# Supplementary material for: Engineering Escherichia coli for the production of butyl octanoate from endogenous octanoyl-CoA
Source: PeerJ. 2019 Jul 1;7:e6971. doi: 10.7717/peerj.6971 (PMC6610577; doi:10.7717/peerj.6971)
Supplement: Supplemental Information 1 [file peerj-07-6971-s001.xlsx]

## Sheet: making BH
														BH
	1	2	3	4			10mM butanol						slope	4113
pBEST01	128535	112553	138922	135126			0.75mM hexanoyl CoA						y int	5801
pBEST04	6364	6515	10483	6762			in 500ul
	1	2	3	4				average	stndev	umol in 500ul
pBEST01	5.9681	5.19096	6.47318	6.2886			pBEST01	0.0173573	0.0016429
pBEST04	0.0273766	0.0347192	0.227668	0.0467299			pBEST04	0.000244165	2.8357e-05
	average	stndev	mg/L					average	stndev	umol/ml reaction volume
pBEST01	5.98021	0.566037					pBEST01	0.0347146	0.00328579
pBEST04	0.0841235	0.00977002					pBEST04	0.000488329	5.67141e-05
	mg/ml							average	stndev	umol/mg protein
pBEST01 protein conc	6.192						pBEST01	0.280318	0.0265326
pBEST04 protein conc	4.922						pBEST04	0.00496068	0.000576128
								average	stndev	umol/min/mg protein
							pBEST01	0.00934393	0.000884419
							pBEST04	0.000165356	1.92043e-05
								average	stndev	nmol/min/mg protein
							pBEST01	9.34393	0.884419
							pBEST04	0.165356	0.0192043
