# Supplementary material for: Engineering Escherichia coli for the production of butyl octanoate from endogenous octanoyl-CoA
Source: PeerJ. 2019 Jul 1;7:e6971. doi: 10.7717/peerj.6971 (PMC6610577; doi:10.7717/peerj.6971)
Supplement: Supplemental Information 2 [file peerj-07-6971-s002.xlsx]

## Sheet: Sheet1
area	AATS	AATS	AATS	AATP	AATP	AATP
	1	2	3	1	2	3					slope	y-int
Butyl Butyrate	1594638	1561688	1802760	964350	1166785	1265625				BB	2305	40091
Butyl Hexanoate	248899	257006	402854	1472602	1853162	1845418				BH	5252	-37856
Butyl Octanoate	45559	47986	50439	334634	318958	356084				BO	9073	5890
OD	26	24	23.5
mg/L sample	AATS	AATS	AATS	AATP	AATP	AATP
	1	2	3	1	2	3
Butyl Butyrate	674.424	660.129	764.715	400.98	488.804	531.685
Butyl Hexanoate	54.5992	56.1428	83.9128	287.597	360.057	358.582
Butyl Octanoate	4.3722	4.6397	4.91006	36.2332	34.5055	38.5974
average	AATS	AATP		standev	AATS	AATP
Butyl Butyrate	699.756	473.823		Butyl Butyrate	56.7087	66.6279
Butyl Hexanoate	64.8849	335.412		Butyl Hexanoate	16.4967	41.4157
Butyl Octanoate	4.64066	36.4454		Butyl Octanoate	0.268931	2.05419
average mg/L	Culture Broth	Cell Pellet		stdev mg/L	AATS	AATP
Butyl Butyrate	44.8562	9.47646		Butyl Butyrate	3.70645	1.44843
Butyl Hexanoate	4.15929	6.70824		Butyl Hexanoate	1.07821	0.900342
Butyl Octanoate	0.297478	0.728907		Butyl Octanoate	0.0161423	0.0410838
OD	24.5			OD	1.32288
	total mg/L	total stdnev
Butyl Butyrate	54.3326	5.15488
Butyl Hexanoate	10.8675	1.97856
Butyl Octanoate	1.02638	0.0572262		ugBO/OD600	41.8933
