# Supplementary material for: Engineering Escherichia coli for the production of butyl octanoate from endogenous octanoyl-CoA
Source: PeerJ. 2019 Jul 1;7:e6971. doi: 10.7717/peerj.6971 (PMC6610577; doi:10.7717/peerj.6971)
Supplement: Supplemental Information 3 [file peerj-07-6971-s003.xlsx]

## Sheet: Sheet1
area	AAT S99G	AAT S99G	AAT S99G	AAT S99G	AAT S99G	AAT S99G	24h	24h	24h	24h	24h	24h	48h	48h	48h	48h	48h	48h			BO
	S1	S2	S3	P1	P2	P3	S1	S2	S3	P1	P2	P3	S1	S2	S3	P1	P2	P3		SLOPE	3006
Butyl Octanoate	2392	3076	2967	10566	13256	11434	42272	36831	41276	142356	162157	149336	49264	49609	49077	408102	439394	400714		Y-INT	-149
OD600	17.1	17.3	17.6				8.56	9.84	9.74				28.85	26.7	29.1
mg/L sample	AAT S99G	AAT S99G	AAT S99G	AAT S99G	AAT S99G	AAT S99G	24h	24h	24h	24h	24h	24h	48h	48h	48h	48h	48h	48h
	S1	S2	S3	P1	P2	P3	S1	S2	S3	P1	P2	P3	S1	S2	S3	P1	P2	P3
Butyl Octanoate	0.845309	1.07285	1.03659	3.56454	4.45941	3.85329	14.1121	12.3021	13.7808	47.4069	53.994	49.7289	16.4381	16.5529	16.3759	135.812	146.222	133.354
average	AAT S99G	AAT S99G	24h	24h	48h	48h			stndev	AAT S99G	AAT S99G	24h	24h	48h	48h
	S	P	S	P	S	P				S	P	S	P	S	P
Butyl Octanoate	0.984919	3.95908	13.3983	50.3766	16.4556	138.463			Butyl Octanoate	0.122257	0.456722	0.963728	3.341	0.0897811	5.57754
mg/L	AAT S99G	AAT S99G	24h	24h	48h	48h				AAT S99G	AAT S99G	24h	24h	48h	48h
	S	P	S	P	S	P				S	P	S	P	S	P
Butyl Octanoate	0.0593325	0.0791816	0.402352	1.00753	0.494163	2.76925			Butyl Octanoate	0.0073649	0.00913443	0.0289408	0.0668201	0.00269613	0.111551
mg/L total	DLBO1 24h	DLBO3 24h	DLBO3 48h							AAT S99G	24h	48h
Butyl Octanoate	0.138514	1.40988	3.26342						Butyl Octanoate	0.0164993	0.0957609	0.114247
