# Supplementary material for: Engineering Escherichia coli for the production of butyl octanoate from endogenous octanoyl-CoA
Source: PeerJ. 2019 Jul 1;7:e6971. doi: 10.7717/peerj.6971 (PMC6610577; doi:10.7717/peerj.6971)
Supplement: Supplemental Information 5 [file peerj-07-6971-s005.xlsx]

## Sheet: Sheet1
area	S	S	S	S	P	P	P	P
	1	2	3	4	1	2	3	4				BO
BO	8671	9128	9478	9669	91002	85340	88520	90609			SLOPE	3006
OD600	17.7	17	15.1	16.6							Y-INT	-149
mg/L sample	S	S	S	S	P	P	P	P
	1	2	3	4	1	2	3	4
BO	2.93413	3.08616	3.20259	3.26613	30.323	28.4395	29.4973	30.1923
AVG	S	P		STDEV	S	P
BO	3.12226	29.613		BO	0.145887	0.862223
AVG mg/L	S	P	total		STDEV	S	P	total
BO	0.156113	0.59226	0.748373		BO	0.00729434	0.0172445	0.0245388
OD600	16.6				OD600	1.09848
ug BO/OD600	45.0827
