# Supplementary material for: Engineering Escherichia coli for the production of butyl octanoate from endogenous octanoyl-CoA
Source: PeerJ. 2019 Jul 1;7:e6971. doi: 10.7717/peerj.6971 (PMC6610577; doi:10.7717/peerj.6971)
Supplement: Supplemental Information 6 [file peerj-07-6971-s006.xlsx]

## Sheet: Raw Data. MC_AATSGFadE_P trace
#"+ TIC Scan MC_AATSGFadE_P3.D "
#Point
0	3.393	0.0112657
1	3.399	0.0126962
2	3.405	0.020514
3	3.411	0.0586078
4	3.416	0.0672011
5	3.422	0.0359978
6	3.428	0.0175692
7	3.434	0.0175378
8	3.44	0.010464
9	3.446	0.00541277
10	3.452	0.00430192
11	3.458	0.00341114
12	3.464	0.00475779
13	3.47	0.00467395
14	3.476	0.00799078
15	3.482	0.00977757
16	3.488	0.00961513
17	3.494	0.00705284
18	3.5	0.0064031
19	3.506	0.00569572
20	3.512	0.0104483
21	3.518	0.00699521
22	3.524	0.00810605
23	3.529	0.00623543
24	3.535	0.00656554
25	3.541	0.00421808
26	3.547	0.00618303
27	3.553	0.00378841
28	3.559	0.00866148
29	3.565	0.00587912
30	3.571	0.00486258
31	3.577	0.00162959
32	3.583	0.00483115
33	3.589	0.00679609
34	3.595	0.00690613
35	3.601	0.00376222
36	3.607	0.0065603
37	3.613	0.00553853
38	3.619	0.0134664
39	3.625	0.0317797
40	3.631	0.0494171
41	3.636	0.143451
42	3.642	0.40098
43	3.648	0.504436
44	3.654	0.332914
45	3.66	0.153769
46	3.666	0.0461579
47	3.672	0.0138856
48	3.678	0.00981949
49	3.684	0.0136184
50	3.69	0.0473368
51	3.696	0.0908643
52	3.702	0.0740025
53	3.708	0.0287563
54	3.714	0.0329168
55	3.72	0.13544
56	3.726	0.274815
57	3.732	0.21453
58	3.738	0.0689198
59	3.744	0.0173911
60	3.749	0.0102649
61	3.755	0.00811653
62	3.761	0.00967801
63	3.767	0.0150698
64	3.773	0.0161178
65	3.779	0.00922214
66	3.785	0.00347926
67	3.791	0.00582672
68	3.797	0.00403469
69	3.803	0.00179727
70	3.809	0.00687469
71	3.815	0.00607299
72	3.821	0.00804318
73	3.827	0.0034845
74	3.833	0.00598391
75	3.839	0.0043124
76	3.845	0.00673845
77	3.851	0.00373078
78	3.856	0.00471587
79	3.862	0.00714716
80	3.868	0.0189735
81	3.874	0.0430297
82	3.88	0.0379365
83	3.886	0.0300768
84	3.892	0.0331002
85	3.898	0.0441353
86	3.904	0.142398
87	3.91	0.492855
88	3.916	0.667102
89	3.922	0.336079
90	3.928	0.0719694
91	3.934	0.0206922
92	3.94	0.0362231
93	3.946	0.164846
94	3.952	0.282182
95	3.958	0.193644
96	3.964	0.0793995
97	3.969	0.0576803
98	3.975	0.0902774
99	3.981	0.116461
100	3.987	0.0861275
101	3.993	0.0489507
102	3.999	0.0259163
103	4.005	0.0147083
104	4.011	0.0301501
105	4.017	0.0610548
106	4.023	0.0619875
107	4.029	0.0344887
108	4.035	0.00992428
109	4.041	0.0148759
110	4.047	0.0410595
111	4.053	0.0693442
112	4.059	0.0640258
113	4.065	0.0342529
114	4.071	0.0279651
115	4.076	0.0151956
116	4.082	0.00743535
117	4.088	0.00809034
118	4.094	0.000885535
119	4.1	0.00477351
120	4.106	0.00637166
121	4.112	0.00394037
122	4.118	0.00414997
123	4.124	0.008782
124	4.13	0.00213262
125	4.136	0.00533941
126	4.142	0.00187063
127	4.148	0.00342163
128	4.154	0.00741963
129	4.16	0.00405565
130	4.166	0.00380937
131	4.172	0.00740915
132	4.178	0.0130472
133	4.184	0.018329
134	4.189	0.0176216
135	4.195	0.0163117
136	4.201	0.0094527
137	4.207	0.0116849
138	4.213	0.00295004
139	4.219	0.00631402
140	4.225	0.00327491
141	4.231	0.00154052
142	4.237	0.00279808
143	4.243	0.00334303
144	4.249	0.00644502
145	4.255	0.0196652
146	4.261	0.0270848
147	4.267	0.0190678
148	4.273	0.0106788
149	4.279	0.00684325
150	4.285	0.0062983
151	4.291	0.0362336
152	4.296	0.120658
153	4.302	0.225329
154	4.308	0.140894
155	4.314	0.0429249
156	4.32	0.00977233
157	4.326	0.00307579
158	4.332	0.00612539
159	4.338	0.0288035
160	4.344	0.0882077
161	4.35	0.116204
162	4.356	0.0685897
163	4.362	0.0210747
164	4.368	0.0051927
165	4.374	0.00621971
166	4.38	0.0168147
167	4.386	0.0366056
168	4.392	0.0330058
169	4.398	0.0140166
170	4.404	0.00783882
171	4.409	0.0079279
172	4.415	0.0178679
173	4.421	0.0267075
174	4.427	0.0252142
175	4.433	0.024381
176	4.439	0.0315387
177	4.445	0.0250413
178	4.451	0.0128114
179	4.457	0.00412376
180	4.463	0.00438576
181	4.469	0.0085462
182	4.475	0.0107889
183	4.481	0.00551233
184	4.487	0.00953654
185	4.493	0.00386177
186	4.499	0.00497262
187	4.505	0.00850952
188	4.511	0.0166051
189	4.516	0.0132568
190	4.522	0.0107312
191	4.528	0.00573764
192	4.534	0.00636118
193	4.54	0.00307055
194	4.546	0.00370458
195	4.552	0.00177631
196	4.558	0.00129948
197	4.564	0.00381985
198	4.57	0.00145668
199	4.576	0.00227934
200	4.582	0.00622495
201	4.588	0.00743535
202	4.594	0.0044958
203	4.6	0.00454819
204	4.606	0.00410281
205	4.612	0.0027876
206	4.618	0.00240509
207	4.624	0.00348974
208	4.629	0.00332207
209	4.635	0.0044172
210	4.641	0.00343734
211	4.647	0.00736199
212	4.653	0.00488878
213	4.659	0.005942
214	4.665	0.011774
215	4.671	0.0338075
216	4.677	0.0919804
217	4.683	0.167162
218	4.689	0.186806
219	4.695	0.130619
220	4.701	0.0660903
221	4.707	0.0342267
222	4.713	0.020294
223	4.719	0.0137441
224	4.725	0.0116954
225	4.731	0.0118002
226	4.736	0.00985617
227	4.742	0.0072572
228	4.748	0.00659174
229	4.754	0.00930074
230	4.76	0.0100448
231	4.766	0.00703188
232	4.772	0.0123399
233	4.778	0.00685373
234	4.784	0.00515602
235	4.79	0.00743535
236	4.796	0.00636118
237	4.802	0.00712096
238	4.808	0.0232912
239	4.814	0.0505489
240	4.82	0.0657811
241	4.826	0.0664361
242	4.832	0.069208
243	4.838	0.0594409
244	4.844	0.0296681
245	4.849	0.0137651
246	4.855	0.00885011
247	4.861	0.00687993
248	4.867	0.00538657
249	4.873	0
250	4.879	0.00206974
251	4.885	0.000382509
252	4.891	0.00336399
253	4.897	0.00037203
254	4.903	0.00663366
255	4.909	0.0106788
256	4.915	0.0103487
257	4.921	0.00332207
258	4.927	0.00580576
259	4.933	0.00653934
260	4.939	0.00930074
261	4.945	0.0116482
262	4.951	0.00930598
263	4.956	0.0117582
264	4.962	0.0457544
265	4.968	0.0732689
266	4.974	0.0435851
267	4.98	0.0140271
268	4.986	0.00668081
269	4.992	0.0044172
270	4.998	0.00460583
271	5.004	0.00299196
272	5.01	0.00237889
273	5.016	0.00290812
274	5.022	0.0063769
275	5.028	0.00676989
276	5.034	0.005942
277	5.04	0.00941602
278	5.046	0.0113652
279	5.052	0.0203516
280	5.058	0.0111504
281	5.064	0.00538657
282	5.069	0.00836805
283	5.075	0.010988
284	5.081	0.0126228
285	5.087	0.00986665
286	5.093	0.0056276
287	5.099	0.00280332
288	5.105	0.00224266
289	5.111	0.00176583
290	5.117	0.00322251
291	5.123	0.0094265
292	5.129	0.0243024
293	5.135	0.0442139
294	5.141	0.0462627
295	5.147	0.137478
296	5.153	0.51228
297	5.159	0.813477
298	5.165	0.522015
299	5.171	0.146386
300	5.176	0.0324085
301	5.182	0.0184862
302	5.188	0.0163169
303	5.194	0.0120726
304	5.2	0.0153109
305	5.206	0.0159396
306	5.212	0.0101182
307	5.218	0.00979329
308	5.224	0.00560664
309	5.23	0.00652362
310	5.236	0.0306898
311	5.242	0.0816788
312	5.248	0.0988237
313	5.254	0.0571668
314	5.26	0.0169562
315	5.266	0.0138647
316	5.272	0.0101234
317	5.278	0.00582148
318	5.284	0.00488878
319	5.289	0.00601535
320	5.295	0.0251565
321	5.301	0.0598811
322	5.307	0.075674
323	5.313	0.0398805
324	5.319	0.0112866
325	5.325	0.00758207
326	5.331	0.00937934
327	5.337	0.00993476
328	5.343	0.0198905
329	5.349	0.0331788
330	5.355	0.0432393
331	5.361	0.0295371
332	5.367	0.0215934
333	5.373	0.0256962
334	5.379	0.0171134
335	5.385	0.00857764
336	5.391	0.00715764
337	5.396	0.0144515
338	5.402	0.0433022
339	5.408	0.0697896
340	5.414	0.0517069
341	5.42	0.0213786
342	5.426	0.0153423
343	5.432	0.0149493
344	5.438	0.0119102
345	5.444	0.00882391
346	5.45	0.00931122
347	5.456	0.0234483
348	5.462	0.0493175
349	5.468	0.0640415
350	5.474	0.0564332
351	5.48	0.061715
352	5.486	0.144667
353	5.492	0.234007
354	5.498	0.29067
355	5.504	0.434426
356	5.509	0.408682
357	5.515	0.181268
358	5.521	0.0564961
359	5.527	0.0158139
360	5.533	0.0079279
361	5.539	0.00463203
362	5.545	0.00462679
363	5.551	0.00965181
364	5.557	0.0427834
365	5.563	0.112107
366	5.569	0.117001
367	5.575	0.0592628
368	5.581	0.0213734
369	5.587	0.0296052
370	5.593	0.0239619
371	5.599	0.0186434
372	5.605	0.0287092
373	5.611	0.0669496
374	5.616	0.0658073
375	5.622	0.0350913
376	5.628	0.00944222
377	5.634	0.00318059
378	5.64	0.00320155
379	5.646	0.00300768
380	5.652	0.015903
381	5.658	0.045833
382	5.664	0.0796615
383	5.67	0.0641935
384	5.676	0.0232859
385	5.682	0.0127014
386	5.688	0.0185962
387	5.694	0.0232912
388	5.7	0.0103959
389	5.706	0.00577432
390	5.712	0.00551233
391	5.718	0.00339543
392	5.724	0.00401373
393	5.729	0.00803794
394	5.735	0.00641358
395	5.741	0.0251408
396	5.747	0.034342
397	5.753	0.0240876
398	5.759	0.0192931
399	5.765	0.0126123
400	5.771	0.0116272
401	5.777	0.00582148
402	5.783	0.00574812
403	5.789	0.0044434
404	5.795	0.0146611
405	5.801	0.0156148
406	5.807	0.0101444
407	5.813	0.00740915
408	5.819	0.00678561
409	5.825	0.00803794
410	5.831	0.00736199
411	5.836	0.0102282
412	5.842	0.00635594
413	5.848	0.0126542
414	5.854	0.0192565
415	5.86	0.03408
416	5.866	0.0564385
417	5.872	0.0564018
418	5.878	0.0411957
419	5.884	0.0566795
420	5.89	0.124321
421	5.896	0.134256
422	5.902	0.0954911
423	5.908	0.0436585
424	5.914	0.0145196
425	5.92	0.0062983
426	5.926	0.00377794
427	5.932	0.0063245
428	5.938	0.00570096
429	5.944	0.00877676
430	5.949	0.011339
431	5.955	0.0318112
432	5.961	0.0508842
433	5.967	0.050072
434	5.973	0.0443711
435	5.979	0.0352118
436	5.985	0.0236737
437	5.991	0.0109985
438	5.997	0.00760303
439	6.003	0.0130682
440	6.009	0.013152
441	6.015	0.0124394
442	6.021	0.0227934
443	6.027	0.0396185
444	6.033	0.0554901
445	6.039	0.0485682
446	6.045	0.0269014
447	6.051	0.012539
448	6.056	0.0112133
449	6.062	0.0121303
450	6.068	0.0120674
451	6.074	0.0122246
452	6.08	0.00483115
453	6.086	0.00435432
454	6.092	0.00963609
455	6.098	0.00772879
456	6.104	0.00997668
457	6.11	0.00871388
458	6.116	0.00866672
459	6.122	0.0153266
460	6.128	0.0177841
461	6.134	0.0118683
462	6.14	0.00615159
463	6.146	0.00571144
464	6.152	0.00524509
465	6.158	0.00816893
466	6.164	0.00653934
467	6.169	0.00533417
468	6.175	0.00264613
469	6.181	0.00173439
470	6.187	0.00292908
471	6.193	0.00237365
472	6.199	0.00580052
473	6.205	0.00941602
474	6.211	0.00856192
475	6.217	0.0138909
476	6.223	0.0087296
477	6.229	0.00665462
478	6.235	0.00297624
479	6.241	0.00503026
480	6.247	0.00569048
481	6.253	0.00740915
482	6.259	0.00542325
483	6.265	0.0129739
484	6.271	0.0212319
485	6.276	0.0254867
486	6.282	0.024554
487	6.288	0.0204564
488	6.294	0.0126909
489	6.3	0.0183185
490	6.306	0.0352852
491	6.312	0.0355419
492	6.318	0.0219288
493	6.324	0.00979329
494	6.33	0.00678037
495	6.336	0.00615683
496	6.342	0.00398229
497	6.348	0.00544945
498	6.354	0.00437004
499	6.36	0.00362074
500	6.366	0.00688517
501	6.372	0.0117006
502	6.378	0.0232964
503	6.384	0.0258377
504	6.389	0.0181299
505	6.395	0.012125
506	6.401	0.00570096
507	6.407	0.00171867
508	6.413	0.00501454
509	6.419	0.0109408
510	6.425	0.0139118
511	6.431	0.0143205
512	6.437	0.0393985
513	6.443	0.0487411
514	6.449	0.037465
515	6.455	0.0161388
516	6.461	0.0130472
517	6.467	0.00569048
518	6.473	0.00652362
519	6.479	0.00636118
520	6.485	0.0126385
521	6.491	0.0250832
522	6.496	0.0274516
523	6.502	0.0165841
524	6.508	0.00964133
525	6.514	0.00668081
526	6.52	0.00372554
527	6.526	0.00616207
528	6.532	0.0103016
529	6.538	0.0167885
530	6.544	0.0150855
531	6.55	0.00831565
532	6.556	0.00907543
533	6.562	0.0254238
534	6.568	0.0354529
535	6.574	0.0379994
536	6.58	0.0204302
537	6.586	0.0156252
538	6.592	0.0231235
539	6.598	0.0533941
540	6.604	0.204202
541	6.609	0.433907
542	6.615	0.434049
543	6.621	0.217868
544	6.627	0.0726715
545	6.633	0.0290026
546	6.639	0.0139223
547	6.645	0.0114962
548	6.651	0.0126176
549	6.657	0.0162802
550	6.663	0.0182242
551	6.669	0.0339857
552	6.675	0.0594357
553	6.681	0.0543844
554	6.687	0.0421389
555	6.693	0.0289083
556	6.699	0.0153737
557	6.705	0.00914879
558	6.711	0.00482591
559	6.716	0.00464775
560	6.722	0.00752967
561	6.728	0.00773403
562	6.734	0.00789646
563	6.74	0.0254709
564	6.746	0.0464199
565	6.752	0.0549294
566	6.758	0.0375069
567	6.764	0.0202363
568	6.77	0.0117425
569	6.776	0.011622
570	6.782	0.0100553
571	6.788	0.013435
572	6.794	0.0340591
573	6.8	0.063266
574	6.806	0.0709005
575	6.812	0.0473421
576	6.818	0.0609447
577	6.824	0.304037
578	6.829	0.87176
579	6.835	1.08327
580	6.841	0.566318
581	6.847	0.147481
582	6.853	0.0440672
583	6.859	0.043276
584	6.865	0.0486049
585	6.871	0.0543111
586	6.877	0.0757107
587	6.883	0.0987293
588	6.889	0.078886
589	6.895	0.0531216
590	6.901	0.0852524
591	6.907	0.222631
592	6.913	0.349855
593	6.919	0.240163
594	6.925	0.0967172
595	6.931	0.042207
596	6.936	0.0242291
597	6.942	0.0203778
598	6.948	0.0217402
599	6.954	0.020797
600	6.96	0.0391312
601	6.966	0.0831879
602	6.972	0.13697
603	6.978	0.137185
604	6.984	0.0829836
605	6.99	0.0932222
606	6.996	0.0980848
607	7.002	0.0642511
608	7.008	0.0433179
609	7.014	0.037575
610	7.02	0.0447117
611	7.026	0.0393827
612	7.032	0.0350808
613	7.038	0.0254447
614	7.044	0.037575
615	7.049	0.0438995
616	7.055	0.0543478
617	7.061	0.050072
618	7.067	0.0292593
619	7.073	0.0171867
620	7.079	0.0101758
621	7.085	0.0151956
622	7.091	0.0291965
623	7.097	0.0346354
624	7.103	0.0349289
625	7.109	0.0270534
626	7.115	0.0164322
627	7.121	0.0132516
628	7.127	0.00840473
629	7.133	0.0142262
630	7.139	0.0377584
631	7.145	0.0479761
632	7.151	0.0416673
633	7.156	0.0380937
634	7.162	0.0324137
635	7.168	0.0274359
636	7.174	0.0242972
637	7.18	0.0304278
638	7.186	0.0374021
639	7.192	0.0375121
640	7.198	0.0445807
641	7.204	0.0452619
642	7.21	0.0355157
643	7.216	0.0197857
644	7.222	0.0183709
645	7.228	0.0235007
646	7.234	0.0310671
647	7.24	0.0358616
648	7.246	0.0780162
649	7.252	0.0993843
650	7.258	0.0806623
651	7.264	0.049197
652	7.269	0.0290602
653	7.275	0.0337918
654	7.281	0.0355786
655	7.287	0.0262622
656	7.293	0.0144934
657	7.299	0.0105373
658	7.305	0.0203202
659	7.311	0.0502816
660	7.317	0.060667
661	7.323	0.0468181
662	7.329	0.0373287
663	7.335	0.0389374
664	7.341	0.0316382
665	7.347	0.0184338
666	7.353	0.0130839
667	7.359	0.0147083
668	7.365	0.0123346
669	7.371	0.0125599
670	7.376	0.0172129
671	7.382	0.0293641
672	7.388	0.0392989
673	7.394	0.0429144
674	7.4	0.0398648
675	7.406	0.0274883
676	7.412	0.0175011
677	7.418	0.0198748
678	7.424	0.0143677
679	7.43	0.00675941
680	7.436	0.0106002
681	7.442	0.0121355
682	7.448	0.0178207
683	7.454	0.0189316
684	7.46	0.0230396
685	7.466	0.0284576
686	7.472	0.0312767
687	7.478	0.023003
688	7.484	0.0171029
689	7.489	0.0146926
690	7.495	0.013152
691	7.501	0.0116168
692	7.507	0.0114229
693	7.513	0.0100081
694	7.519	0.0153895
695	7.525	0.0298672
696	7.531	0.0370458
697	7.537	0.0298934
698	7.543	0.0174854
699	7.549	0.0113286
700	7.555	0.00954178
701	7.561	0.0121617
702	7.567	0.0134455
703	7.573	0.013938
704	7.579	0.0163745
705	7.585	0.0202887
706	7.591	0.0211166
707	7.596	0.024009
708	7.602	0.0178889
709	7.608	0.0127328
710	7.614	0.0156776
711	7.62	0.0144672
712	7.626	0.0181194
713	7.632	0.0293799
714	7.638	0.0314915
715	7.644	0.0273782
716	7.65	0.0174487
717	7.656	0.0144568
718	7.662	0.0127905
719	7.668	0.0133931
720	7.674	0.0115434
721	7.68	0.0135345
722	7.686	0.0182137
723	7.692	0.0152689
724	7.698	0.0102806
725	7.704	0.0158977
726	7.709	0.0166156
727	7.715	0.0327229
728	7.721	0.0429563
729	7.727	0.0437004
730	7.733	0.0253976
731	7.739	0.0155571
732	7.745	0.0136551
733	7.751	0.0130315
734	7.757	0.0173125
735	7.763	0.0204931
736	7.769	0.0268438
737	7.775	0.0117687
738	7.781	0.0127433
739	7.787	0.0148497
740	7.793	0.0143415
741	7.799	0.0131782
742	7.805	0.021824
743	7.811	0.0211271
744	7.816	0.0213996
745	7.822	0.0229715
746	7.828	0.0183919
747	7.834	0.0209856
748	7.84	0.0240928
749	7.846	0.0262831
750	7.852	0.0325447
751	7.858	0.0342791
752	7.864	0.0252928
753	7.87	0.0193246
754	7.876	0.0160392
755	7.882	0.0187168
756	7.888	0.0188216
757	7.894	0.0173282
758	7.9	0.0166575
759	7.906	0.0546307
760	7.912	0.129231
761	7.918	0.14724
762	7.924	0.0876628
763	7.929	0.0393408
764	7.935	0.0255705
765	7.941	0.0241505
766	7.947	0.023113
767	7.953	0.0310304
768	7.959	0.0357201
769	7.965	0.0338914
770	7.971	0.0187744
771	7.977	0.0113286
772	7.983	0.0140428
773	7.989	0.0173334
774	7.995	0.0280961
775	8.001	0.0444392
776	8.007	0.150457
777	8.013	0.521931
778	8.019	0.801226
779	8.025	0.523912
780	8.031	0.165438
781	8.036	0.057324
782	8.042	0.0426053
783	8.048	0.0406508
784	8.054	0.0330949
785	8.06	0.0271162
786	8.066	0.0235846
787	8.072	0.0201787
788	8.078	0.0258272
789	8.084	0.0354686
790	8.09	0.0495481
791	8.096	0.0459378
792	8.102	0.0375383
793	8.108	0.030323
794	8.114	0.0339281
795	8.12	0.0302444
796	8.126	0.0343682
797	8.132	0.0515864
798	8.138	0.0928817
799	8.144	0.165029
800	8.149	0.199885
801	8.155	0.162509
802	8.161	0.0941549
803	8.167	0.064838
804	8.173	0.0536771
805	8.179	0.0401687
806	8.185	0.0394089
807	8.191	0.0381881
808	8.197	0.0588174
809	8.203	0.0987136
810	8.209	0.0958893
811	8.215	0.06816
812	8.221	0.0511672
813	8.227	0.0444182
814	8.233	0.0606146
815	8.239	0.0569625
816	8.245	0.0703555
817	8.251	0.078886
818	8.256	0.0746627
819	8.262	0.0576227
820	8.268	0.0581205
821	8.274	0.0703241
822	8.28	0.0698787
823	8.286	0.055029
824	8.292	0.0574445
825	8.298	0.0722052
826	8.304	0.0816003
827	8.31	0.0635594
828	8.316	0.0550813
829	8.322	0.043365
830	8.328	0.0426157
831	8.334	0.0410385
832	8.34	0.0390317
833	8.346	0.0349027
834	8.352	0.0488302
835	8.358	0.0532946
836	8.364	0.0441353
837	8.369	0.027242
838	8.375	0.0335403
839	8.381	0.0393041
840	8.387	0.0378946
841	8.393	0.0388902
842	8.399	0.0450732
843	8.405	0.0430768
844	8.411	0.0396185
845	8.417	0.0331683
846	8.423	0.0298148
847	8.429	0.0283738
848	8.435	0.0559459
849	8.441	0.0905237
850	8.447	0.0898216
851	8.453	0.0559826
852	8.459	0.0283581
853	8.465	0.0196075
854	8.471	0.0186015
855	8.476	0.017585
856	8.482	0.0311247
857	8.488	0.0335298
858	8.494	0.0411276
859	8.5	0.0434384
860	8.506	0.0355053
861	8.512	0.0373182
862	8.518	0.0484529
863	8.524	0.0452095
864	8.53	0.0359611
865	8.536	0.0300191
866	8.542	0.0358354
867	8.548	0.0516283
868	8.554	0.0541749
869	8.56	0.0379889
870	8.566	0.0288244
871	8.572	0.029448
872	8.578	0.0284262
873	8.584	0.034735
874	8.589	0.0414315
875	8.595	0.0380518
876	8.601	0.0301292
877	8.607	0.0359402
878	8.613	0.0324242
879	8.619	0.0401268
880	8.625	0.0336503
881	8.631	0.0330478
882	8.637	0.0265137
883	8.643	0.0299353
884	8.649	0.0310199
885	8.655	0.0294794
886	8.661	0.0287249
887	8.667	0.0234745
888	8.673	0.0212843
889	8.679	0.0223375
890	8.685	0.0211219
891	8.691	0.0245592
892	8.696	0.0271791
893	8.702	0.0246116
894	8.708	0.0270743
895	8.714	0.0276298
896	8.72	0.0265975
897	8.726	0.0288664
898	8.732	0.0258063
899	8.738	0.0236894
900	8.744	0.0224266
901	8.75	0.0199429
902	8.756	0.024402
903	8.762	0.031523
904	8.768	0.0295423
905	8.774	0.0293432
906	8.78	0.026608
907	8.786	0.0241819
908	8.792	0.0246116
909	8.798	0.0225261
910	8.804	0.0173806
911	8.809	0.0204145
912	8.815	0.0261731
913	8.821	0.0264927
914	8.827	0.0304278
915	8.833	0.0340329
916	8.839	0.0394613
917	8.845	0.0317064
918	8.851	0.0319841
919	8.857	0.0368833
920	8.863	0.0379418
921	8.869	0.0386858
922	8.875	0.0277765
923	8.881	0.0245854
924	8.887	0.0206922
925	8.893	0.023878
926	8.899	0.020907
927	8.905	0.0222641
928	8.911	0.0230239
929	8.916	0.0221908
930	8.922	0.0229191
931	8.928	0.0201525
932	8.934	0.0191045
933	8.94	0.0208494
934	8.946	0.0217873
935	8.952	0.0285205
936	8.958	0.0268752
937	8.964	0.0267547
938	8.97	0.0292279
939	8.976	0.0318112
940	8.982	0.0244387
941	8.988	0.0230292
942	8.994	0.0184338
943	9	0.0231182
944	9.006	0.0295842
945	9.012	0.0263198
946	9.018	0.0300663
947	9.024	0.0326862
948	9.029	0.0331054
949	9.035	0.0291546
950	9.041	0.0291493
951	9.047	0.0238623
952	9.053	0.0273887
953	9.059	0.0284
954	9.065	0.0355
955	9.071	0.0338075
956	9.077	0.0363751
957	9.083	0.0406875
958	9.089	0.0485158
959	9.095	0.0511986
960	9.101	0.041945
961	9.107	0.0304645
962	9.113	0.0345673
963	9.119	0.0303754
964	9.125	0.033294
965	9.131	0.039105
966	9.137	0.0372868
967	9.142	0.032026
968	9.148	0.0251827
969	9.154	0.0269957
970	9.16	0.0288716
971	9.166	0.0241767
972	9.172	0.02709
973	9.178	0.0269591
974	9.184	0.0319684
975	9.19	0.0427258
976	9.196	0.0431292
977	9.202	0.0437266
978	9.208	0.0453876
979	9.214	0.0429144
980	9.22	0.0396657
981	9.226	0.0346145
982	9.232	0.0324557
983	9.238	0.0342739
984	9.244	0.0499515
985	9.249	0.0829417
986	9.255	0.105552
987	9.261	0.0989127
988	9.267	0.0814273
989	9.273	0.0638791
990	9.279	0.0531845
991	9.285	0.0590217
992	9.291	0.0683696
993	9.297	0.089502
994	9.303	0.0857397
995	9.309	0.0766171
996	9.315	0.0685949
997	9.321	0.0554796
998	9.327	0.0757002
999	9.333	0.0882549
1000	9.339	0.0794205
1001	9.345	0.0585659
1002	9.351	0.0503183
1003	9.357	0.0398963
1004	9.362	0.0450051
1005	9.368	0.0599806
1006	9.374	0.0650895
1007	9.38	0.072158
1008	9.386	0.0851738
1009	9.392	0.0903246
1010	9.398	0.0818046
1011	9.404	0.0687836
1012	9.41	0.0480075
1013	9.416	0.0425895
1014	9.422	0.052016
1015	9.428	0.0686578
1016	9.434	0.0787131
1017	9.44	0.074364
1018	9.446	0.0811968
1019	9.452	0.091907
1020	9.458	0.0903665
1021	9.464	0.0800597
1022	9.469	0.0686421
1023	9.475	0.0579004
1024	9.481	0.0568
1025	9.487	0.0497734
1026	9.493	0.0448741
1027	9.499	0.0411276
1028	9.505	0.0508318
1029	9.511	0.0564385
1030	9.517	0.0783463
1031	9.523	0.0771202
1032	9.529	0.071262
1033	9.535	0.0550604
1034	9.541	0.044282
1035	9.547	0.0389793
1036	9.553	0.0376326
1037	9.559	0.0439991
1038	9.565	0.0516335
1039	9.571	0.0557887
1040	9.577	0.0522151
1041	9.582	0.0472897
1042	9.588	0.0441353
1043	9.594	0.0387382
1044	9.6	0.0438733
1045	9.606	0.0441196
1046	9.612	0.0399434
1047	9.618	0.0401582
1048	9.624	0.044413
1049	9.63	0.0434332
1050	9.636	0.0450523
1051	9.642	0.0469281
1052	9.648	0.0450994
1053	9.654	0.0486678
1054	9.66	0.049438
1055	9.666	0.0452933
1056	9.672	0.0453457
1057	9.678	0.0376641
1058	9.684	0.0337551
1059	9.689	0.0381042
1060	9.695	0.0427572
1061	9.701	0.0384553
1062	9.707	0.0453195
1063	9.713	0.0422437
1064	9.719	0.0481385
1065	9.725	0.0525191
1066	9.731	0.044937
1067	9.737	0.0424166
1068	9.743	0.0517645
1069	9.749	0.0557573
1070	9.755	0.0565695
1071	9.761	0.0467133
1072	9.767	0.0386701
1073	9.773	0.0342739
1074	9.779	0.0347979
1075	9.785	0.0359768
1076	9.791	0.0349655
1077	9.797	0.0389793
1078	9.802	0.0457387
1079	9.808	0.0432498
1080	9.814	0.0361602
1081	9.82	0.0400744
1082	9.826	0.0349655
1083	9.832	0.0351437
1084	9.838	0.0371768
1085	9.844	0.0395871
1086	9.85	0.0341377
1087	9.856	0.0345568
1088	9.862	0.0388168
1089	9.868	0.0303335
1090	9.874	0.0311876
1091	9.88	0.0319788
1092	9.886	0.0360502
1093	9.892	0.0378475
1094	9.898	0.0437633
1095	9.904	0.0444497
1096	9.909	0.0479447
1097	9.915	0.0458225
1098	9.921	0.0399067
1099	9.927	0.039629
1100	9.933	0.0393565
1101	9.939	0.035762
1102	9.945	0.0330687
1103	9.951	0.0333831
1104	9.957	0.035631
1105	9.963	0.0350337
1106	9.969	0.0428253
1107	9.975	0.0497839
1108	9.981	0.0476198
1109	9.987	0.0452042
1110	9.993	0.0414053
1111	9.999	0.0342267
1112	10.005	0.0340695
1113	10.011	0.0362179
1114	10.017	0.0399434
1115	10.022	0.040939
1116	10.028	0.0389688
1117	10.034	0.0386911
1118	10.04	0.037968
1119	10.046	0.0344049
1120	10.052	0.0371558
1121	10.058	0.0339019
1122	10.064	0.0396605
1123	10.07	0.0405355
1124	10.076	0.0480442
1125	10.082	0.0465089
1126	10.088	0.0536351
1127	10.094	0.0503131
1128	10.1	0.0457492
1129	10.106	0.0446016
1130	10.112	0.0378737
1131	10.118	0.0456758
1132	10.124	0.0449894
1133	10.129	0.0451151
1134	10.135	0.0457282
1135	10.141	0.0519846
1136	10.147	0.0492651
1137	10.153	0.0494013
1138	10.159	0.0409128
1139	10.165	0.0498991
1140	10.171	0.0535356
1141	10.177	0.045964
1142	10.183	0.0491132
1143	10.189	0.0508528
1144	10.195	0.0568419
1145	10.201	0.0599125
1146	10.207	0.0571249
1147	10.213	0.0562394
1148	10.219	0.0516126
1149	10.225	0.0507585
1150	10.231	0.0532631
1151	10.237	0.0500668
1152	10.242	0.0531164
1153	10.248	0.0574026
1154	10.254	0.0732008
1155	10.26	0.0904713
1156	10.266	0.0871021
1157	10.272	0.07373
1158	10.278	0.0723676
1159	10.284	0.0761613
1160	10.29	0.0879719
1161	10.296	0.0857764
1162	10.302	0.0887317
1163	10.308	0.0915874
1164	10.314	0.093851
1165	10.32	0.100432
1166	10.326	0.105819
1167	10.332	0.105311
1168	10.338	0.0992848
1169	10.344	0.10333
1170	10.349	0.101826
1171	10.355	0.103513
1172	10.361	0.111352
1173	10.367	0.11775
1174	10.373	0.11732
1175	10.379	0.112191
1176	10.385	0.109324
1177	10.391	0.0987503
1178	10.397	0.0899369
1179	10.403	0.0918232
1180	10.409	0.0963976
1181	10.415	0.0937567
1182	10.421	0.0901779
1183	10.427	0.10791
1184	10.433	0.180141
1185	10.439	0.936907
1186	10.445	5.48475
1187	10.451	18.2402
1188	10.457	34.2102
1189	10.462	37.8365
1190	10.468	24.5223
1191	10.474	8.98444
1192	10.48	2.78165
1193	10.486	1.11789
1194	10.492	0.629946
1195	10.498	0.456381
1196	10.504	0.371024
1197	10.51	0.312604
1198	10.516	0.26062
1199	10.522	0.241987
1200	10.528	0.221714
1201	10.534	0.211501
1202	10.54	0.214394
1203	10.546	0.206906
1204	10.552	0.198459
1205	10.558	0.175493
1206	10.564	0.159223
1207	10.569	0.160795
1208	10.575	0.176525
1209	10.581	0.15729
1210	10.587	0.134659
1211	10.593	0.124399
1212	10.599	0.122104
1213	10.605	0.115507
1214	10.611	0.118091
1215	10.617	0.115476
1216	10.623	0.111305
1217	10.629	0.106914
1218	10.635	0.112248
1219	10.641	0.108255
1220	10.647	0.111169
1221	10.653	0.111913
1222	10.659	0.106977
1223	10.665	0.105326
1224	10.671	0.105106
1225	10.677	0.10508
1226	10.682	0.106007
1227	10.688	0.108177
1228	10.694	0.104174
1229	10.7	0.0992586
1230	10.706	0.0945846
1231	10.712	0.0877152
1232	10.718	0.0860908
1233	10.724	0.095816
1234	10.73	0.0907805
1235	10.736	0.0959208
1236	10.742	0.0921062
1237	10.748	0.0854096
1238	10.754	0.084807
1239	10.76	0.0884854
1240	10.766	0.0931122
1241	10.772	0.0933008
1242	10.778	0.0926616
1243	10.784	0.090356
1244	10.789	0.0912625
1245	10.795	0.0899473
1246	10.801	0.0937096
1247	10.807	0.0881186
1248	10.813	0.0876575
1249	10.819	0.0893762
1250	10.825	0.0883544
1251	10.831	0.0860122
1252	10.837	0.100207
1253	10.843	0.101166
1254	10.849	0.0917918
1255	10.855	0.0865467
1256	10.861	0.0899264
1257	10.867	0.0831984
1258	10.873	0.0880662
1259	10.879	0.0925306
1260	10.885	0.0911787
1261	10.891	0.0930755
1262	10.897	0.0904923
1263	10.902	0.0901989
1264	10.908	0.0940501
1265	10.914	0.101255
1266	10.92	0.0919961
1267	10.926	0.0877728
1268	10.932	0.0887789
1269	10.938	0.0854673
1270	10.944	0.0923839
1271	10.95	0.0863633
1272	10.956	0.0852943
1273	10.962	0.0868506
1274	10.968	0.0884487
1275	10.974	0.0884225
1276	10.98	0.100956
1277	10.986	0.0921114
1278	10.992	0.0858131
1279	10.998	0.0914617
1280	11.004	0.0789227
1281	11.009	0.0859493
1282	11.015	0.0816998
1283	11.021	0.0824753
1284	11.027	0.0875003
1285	11.033	0.085111
1286	11.039	0.0863423
1287	11.045	0.0809924
1288	11.051	0.0892714
1289	11.057	0.0960884
1290	11.063	0.0915088
1291	11.069	0.0859598
1292	11.075	0.0893657
1293	11.081	0.0970316
1294	11.087	0.089329
1295	11.093	0.0925935
1296	11.099	0.0844979
1297	11.105	0.09088
1298	11.111	0.0861275
1299	11.117	0.0945322
1300	11.122	0.0870183
1301	11.128	0.0913045
1302	11.134	0.0839372
1303	11.14	0.0911682
1304	11.146	0.0940449
1305	11.152	0.0951924
1306	11.158	0.0977966
1307	11.164	0.102334
1308	11.17	0.107857
1309	11.176	0.104299
1310	11.182	0.105473
1311	11.188	0.105473
1312	11.194	0.109974
1313	11.2	0.102182
1314	11.206	0.105049
1315	11.212	0.107967
1316	11.218	0.0986927
1317	11.224	0.106264
1318	11.229	0.104048
1319	11.235	0.103602
1320	11.241	0.102203
1321	11.247	0.102942
1322	11.253	0.114569
1323	11.259	0.11622
1324	11.265	0.110849
1325	11.271	0.112767
1326	11.277	0.118442
1327	11.283	0.118274
1328	11.289	0.112762
1329	11.295	0.109172
1330	11.301	0.123682
1331	11.307	0.122979
1332	11.313	0.117965
1333	11.319	0.116309
1334	11.325	0.1266
1335	11.331	0.125914
1336	11.337	0.122141
1337	11.342	0.129796
1338	11.348	0.129257
1339	11.354	0.12333
1340	11.36	0.119254
1341	11.366	0.118353
1342	11.372	0.12409
1343	11.378	0.125107
1344	11.384	0.119285
1345	11.39	0.127653
1346	11.396	0.126841
1347	11.402	0.124656
1348	11.408	0.133297
1349	11.414	0.129886
1350	11.42	0.129351
1351	11.426	0.127087
1352	11.432	0.128439
1353	11.438	0.122476
1354	11.444	0.124148
1355	11.449	0.134617
1356	11.455	0.14778
1357	11.461	0.232236
1358	11.467	0.42502
1359	11.473	0.591873
1360	11.479	0.487773
1361	11.485	0.31907
1362	11.491	0.218795
1363	11.497	0.187168
1364	11.503	0.152894
1365	11.509	0.162855
1366	11.515	0.153737
1367	11.521	0.142383
1368	11.527	0.145181
1369	11.533	0.136189
1370	11.539	0.136027
1371	11.545	0.145002
1372	11.551	0.130111
1373	11.557	0.139464
1374	11.562	0.137803
1375	11.568	0.140674
1376	11.574	0.144154
1377	11.58	0.138615
1378	11.586	0.141345
1379	11.592	0.142325
1380	11.598	0.144274
1381	11.604	0.145034
1382	11.61	0.153224
1383	11.616	0.154958
1384	11.622	0.155865
1385	11.628	0.169431
1386	11.634	0.209275
1387	11.64	0.217454
1388	11.646	0.187272
1389	11.652	0.161461
1390	11.658	0.149959
1391	11.664	0.138982
1392	11.669	0.1431
1393	11.675	0.144782
1394	11.681	0.141754
1395	11.687	0.13631
1396	11.693	0.130551
1397	11.699	0.139773
1398	11.705	0.138007
1399	11.711	0.135193
1400	11.717	0.138573
1401	11.723	0.137929
1402	11.729	0.138432
1403	11.735	0.140879
1404	11.741	0.138547
1405	11.747	0.14255
1406	11.753	0.143525
1407	11.759	0.145616
1408	11.765	0.157547
1409	11.771	0.16439
1410	11.777	0.158464
1411	11.782	0.153109
1412	11.788	0.145558
1413	11.794	0.13753
1414	11.8	0.142886
1415	11.806	0.12988
1416	11.812	0.136147
1417	11.818	0.136205
1418	11.824	0.141722
1419	11.83	0.133679
1420	11.836	0.14419
1421	11.842	0.135943
1422	11.848	0.135927
1423	11.854	0.139296
1424	11.86	0.13196
1425	11.866	0.135345
1426	11.872	0.147743
1427	11.878	0.16482
1428	11.884	0.166512
1429	11.889	0.160135
1430	11.895	0.140868
1431	11.901	0.132338
1432	11.907	0.136666
1433	11.913	0.138406
1434	11.919	0.144426
1435	11.925	0.141811
1436	11.931	0.137211
1437	11.937	0.134282
1438	11.943	0.138369
1439	11.949	0.134287
1440	11.955	0.14331
1441	11.961	0.136524
1442	11.967	0.144976
1443	11.973	0.135979
1444	11.979	0.141811
1445	11.985	0.139784
1446	11.991	0.139637
1447	11.997	0.141644
1448	12.002	0.141308
1449	12.008	0.138793
1450	12.014	0.139715
1451	12.02	0.134853
1452	12.026	0.144332
1453	12.032	0.151018
1454	12.038	0.135377
1455	12.044	0.142346
1456	12.05	0.138725
1457	12.056	0.149467
1458	12.062	0.137158
1459	12.068	0.147732
1460	12.074	0.145836
1461	12.08	0.154759
1462	12.086	0.150997
1463	12.092	0.150384
1464	12.098	0.14931
1465	12.104	0.150651
1466	12.109	0.149074
1467	12.115	0.156305
1468	12.121	0.153355
1469	12.127	0.160764
1470	12.133	0.161267
1471	12.139	0.158134
1472	12.145	0.156541
1473	12.151	0.15762
1474	12.157	0.159339
1475	12.163	0.16155
1476	12.169	0.155529
1477	12.175	0.158327
1478	12.181	0.158935
1479	12.187	0.155702
1480	12.193	0.166093
1481	12.199	0.170887
1482	12.205	0.164269
1483	12.211	0.162095
1484	12.217	0.173659
1485	12.222	0.179234
1486	12.228	0.187178
1487	12.234	0.189237
1488	12.24	0.199701
1489	12.246	0.225827
1490	12.252	0.252021
1491	12.258	0.288915
1492	12.264	0.322917
1493	12.27	0.367419
1494	12.276	0.415374
1495	12.282	0.447284
1496	12.288	0.465341
1497	12.294	0.481186
1498	12.3	0.495077
1499	12.306	0.498682
1500	12.312	0.498981
1501	12.318	0.496329
1502	12.324	0.453405
1503	12.329	0.41224
1504	12.335	0.37782
1505	12.341	0.342309
1506	12.347	0.325977
1507	12.353	0.311038
1508	12.359	0.295795
1509	12.365	0.281501
1510	12.371	0.274406
1511	12.377	0.27046
1512	12.383	0.25691
1513	12.389	0.259713
1514	12.395	0.251791
1515	12.401	0.242312
1516	12.407	0.236936
1517	12.413	0.235636
1518	12.419	0.23364
1519	12.425	0.237041
1520	12.431	0.227179
1521	12.437	0.230994
1522	12.442	0.214871
1523	12.448	0.221069
1524	12.454	0.214514
1525	12.46	0.219052
1526	12.466	0.228096
1527	12.472	0.273389
1528	12.478	0.391925
1529	12.484	0.532925
1530	12.49	0.579633
1531	12.496	0.506673
1532	12.502	0.387199
1533	12.508	0.313647
1534	12.514	0.269281
1535	12.52	0.251738
1536	12.526	0.258587
1537	12.532	0.260431
1538	12.538	0.275559
1539	12.544	0.272682
1540	12.549	0.243082
1541	12.555	0.215169
1542	12.561	0.210034
1543	12.567	0.203684
1544	12.573	0.212979
1545	12.579	0.195971
1546	12.585	0.190736
1547	12.591	0.205088
1548	12.597	0.201284
1549	12.603	0.190605
1550	12.609	0.187204
1551	12.615	0.194666
1552	12.621	0.195861
1553	12.627	0.192654
1554	12.633	0.198156
1555	12.639	0.193571
1556	12.645	0.195509
1557	12.651	0.192753
1558	12.657	0.195992
1559	12.662	0.190018
1560	12.668	0.182205
1561	12.674	0.191339
1562	12.68	0.192198
1563	12.686	0.191726
1564	12.692	0.207498
1565	12.698	0.225953
1566	12.704	0.251785
1567	12.71	0.243087
1568	12.716	0.233546
1569	12.722	0.213608
1570	12.728	0.212225
1571	12.734	0.211281
1572	12.74	0.19334
1573	12.746	0.194283
1574	12.752	0.190977
1575	12.758	0.197066
1576	12.764	0.182179
1577	12.769	0.186329
1578	12.775	0.178249
1579	12.781	0.197736
1580	12.787	0.185176
1581	12.793	0.182813
1582	12.799	0.182352
1583	12.805	0.183777
1584	12.811	0.184401
1585	12.817	0.189133
1586	12.823	0.19203
1587	12.829	0.191061
1588	12.835	0.197464
1589	12.841	0.194205
1590	12.847	0.188949
1591	12.853	0.177689
1592	12.859	0.193204
1593	12.865	0.183384
1594	12.871	0.18373
1595	12.877	0.185203
1596	12.882	0.188792
1597	12.888	0.184867
1598	12.894	0.182426
1599	12.9	0.176615
1600	12.906	0.179135
1601	12.912	0.178826
1602	12.918	0.180529
1603	12.924	0.171013
1604	12.93	0.176468
1605	12.936	0.180686
1606	12.942	0.177563
1607	12.948	0.18569
1608	12.954	0.179213
1609	12.96	0.183809
1610	12.966	0.187079
1611	12.972	0.177856
1612	12.978	0.182111
1613	12.984	0.184553
1614	12.989	0.186072
1615	12.995	0.185496
1616	13.001	0.182824
1617	13.007	0.176096
1618	13.013	0.17259
1619	13.019	0.185208
1620	13.025	0.177526
1621	13.031	0.182205
1622	13.037	0.182808
1623	13.043	0.182038
1624	13.049	0.175519
1625	13.055	0.177998
1626	13.061	0.169043
1627	13.067	0.182965
1628	13.073	0.177432
1629	13.079	0.177406
1630	13.085	0.178705
1631	13.091	0.186366
1632	13.097	0.176609
1633	13.102	0.17476
1634	13.108	0.175252
1635	13.114	0.184862
1636	13.12	0.185218
1637	13.126	0.174702
1638	13.132	0.18252
1639	13.138	0.177196
1640	13.144	0.18449
1641	13.15	0.178679
1642	13.156	0.188278
1643	13.162	0.180775
1644	13.168	0.181687
1645	13.174	0.181189
1646	13.18	0.172957
1647	13.186	0.177652
1648	13.192	0.188284
1649	13.198	0.194996
1650	13.204	0.180434
1651	13.209	0.191737
1652	13.215	0.188624
1653	13.221	0.193131
1654	13.227	0.18034
1655	13.233	0.190301
1656	13.239	0.185292
1657	13.245	0.195614
1658	13.251	0.183101
1659	13.257	0.195473
1660	13.263	0.190144
1661	13.269	0.198701
1662	13.275	0.191863
1663	13.281	0.196903
1664	13.287	0.201058
1665	13.293	0.196605
1666	13.299	0.191674
1667	13.305	0.186382
1668	13.311	0.185737
1669	13.317	0.182803
1670	13.322	0.187361
1671	13.328	0.190579
1672	13.334	0.190998
1673	13.34	0.197024
1674	13.346	0.189761
1675	13.352	0.182923
1676	13.358	0.186282
1677	13.364	0.1893
1678	13.37	0.180529
1679	13.376	0.188137
1680	13.382	0.176997
1681	13.388	0.179758
1682	13.394	0.18437
1683	13.4	0.183322
1684	13.406	0.179507
1685	13.412	0.18252
1686	13.418	0.181137
1687	13.424	0.182798
1688	13.429	0.185632
1689	13.435	0.193204
1690	13.441	0.180057
1691	13.447	0.182143
1692	13.453	0.188509
1693	13.459	0.190023
1694	13.465	0.174372
1695	13.471	0.182179
1696	13.477	0.188975
1697	13.483	0.179318
1698	13.489	0.186769
1699	13.495	0.177699
1700	13.501	0.186439
1701	13.507	0.177338
1702	13.513	0.178407
1703	13.519	0.188603
1704	13.525	0.175682
1705	13.531	0.175839
1706	13.537	0.175918
1707	13.542	0.179999
1708	13.548	0.184291
1709	13.554	0.182446
1710	13.56	0.182373
1711	13.566	0.185239
1712	13.572	0.188603
1713	13.578	0.191328
1714	13.584	0.184962
1715	13.59	0.188085
1716	13.596	0.178365
1717	13.602	0.190474
1718	13.608	0.175504
1719	13.614	0.183809
1720	13.62	0.187246
1721	13.626	0.197485
1722	13.632	0.198077
1723	13.638	0.18985
1724	13.644	0.190925
1725	13.649	0.180083
1726	13.655	0.185213
1727	13.661	0.180785
1728	13.667	0.183694
1729	13.673	0.182326
1730	13.679	0.182703
1731	13.685	0.181545
1732	13.691	0.172941
1733	13.697	0.187686
1734	13.703	0.219597
1735	13.709	0.267688
1736	13.715	0.377484
1737	13.721	0.467767
1738	13.727	0.531856
1739	13.733	0.497917
1740	13.739	0.425005
1741	13.745	0.341167
1742	13.751	0.297613
1743	13.757	0.252262
1744	13.762	0.244827
1745	13.768	0.239634
1746	13.774	0.216652
1747	13.78	0.215258
1748	13.786	0.217831
1749	13.792	0.210527
1750	13.798	0.205413
1751	13.804	0.213089
1752	13.81	0.197894
1753	13.816	0.208986
1754	13.822	0.204265
1755	13.828	0.208897
1756	13.834	0.19923
1757	13.84	0.199859
1758	13.846	0.196327
1759	13.852	0.195137
1760	13.858	0.196269
1761	13.864	0.187618
1762	13.869	0.200267
1763	13.875	0.192848
1764	13.881	0.194451
1765	13.887	0.186156
1766	13.893	0.18439
1767	13.899	0.181362
1768	13.905	0.187477
1769	13.911	0.179968
1770	13.917	0.182315
1771	13.923	0.184191
1772	13.929	0.18448
1773	13.935	0.189442
1774	13.941	0.188399
1775	13.947	0.181205
1776	13.953	0.190144
1777	13.959	0.186209
1778	13.965	0.19039
1779	13.971	0.186995
1780	13.977	0.191386
1781	13.982	0.181451
1782	13.988	0.189237
1783	13.994	0.198339
1784	14	0.199686
1785	14.006	0.255076
1786	14.012	0.27809
1787	14.018	0.299028
1788	14.024	0.30595
1789	14.03	0.293945
1790	14.036	0.275024
1791	14.042	0.237276
1792	14.048	0.22523
1793	14.054	0.215578
1794	14.06	0.224072
1795	14.066	0.203238
1796	14.072	0.201389
1797	14.078	0.194142
1798	14.084	0.200314
1799	14.089	0.204208
1800	14.095	0.207855
1801	14.101	0.202971
1802	14.107	0.193356
1803	14.113	0.190233
1804	14.119	0.195179
1805	14.125	0.185056
1806	14.131	0.194744
1807	14.137	0.195635
1808	14.143	0.185528
1809	14.149	0.181388
1810	14.155	0.192523
1811	14.161	0.190684
1812	14.167	0.184071
1813	14.173	0.189148
1814	14.179	0.188939
1815	14.185	0.18646
1816	14.191	0.179344
1817	14.197	0.18066
1818	14.202	0.188598
1819	14.208	0.187901
1820	14.214	0.19519
1821	14.22	0.184144
1822	14.226	0.178857
1823	14.232	0.18679
1824	14.238	0.176201
1825	14.244	0.184029
1826	14.25	0.189185
1827	14.256	0.180843
1828	14.262	0.176525
1829	14.268	0.18503
1830	14.274	0.183699
1831	14.28	0.184626
1832	14.286	0.186439
1833	14.292	0.185695
1834	14.298	0.179743
1835	14.304	0.190495
1836	14.309	0.180293
1837	14.315	0.183531
1838	14.321	0.191732
1839	14.327	0.184673
1840	14.333	0.18088
1841	14.339	0.179575
1842	14.345	0.179827
1843	14.351	0.175168
1844	14.357	0.182902
1845	14.363	0.183966
1846	14.369	0.179046
1847	14.375	0.184087
1848	14.381	0.184427
1849	14.387	0.182043
1850	14.393	0.179245
1851	14.399	0.184742
1852	14.405	0.191077
1853	14.411	0.178202
1854	14.417	0.189447
1855	14.422	0.177652
1856	14.428	0.192224
1857	14.434	0.187954
1858	14.44	0.195132
1859	14.446	0.184563
1860	14.452	0.189389
1861	14.458	0.195866
1862	14.464	0.189363
1863	14.47	0.201902
1864	14.476	0.199502
1865	14.482	0.195441
1866	14.488	0.20252
1867	14.494	0.202106
1868	14.5	0.215725
1869	14.506	0.203526
1870	14.512	0.20065
1871	14.518	0.199052
1872	14.524	0.198894
1873	14.529	0.201708
1874	14.535	0.194477
1875	14.541	0.200765
1876	14.547	0.190118
1877	14.553	0.186156
1878	14.559	0.191003
1879	14.565	0.192879
1880	14.571	0.189782
1881	14.577	0.192392
1882	14.583	0.184988
1883	14.589	0.183322
1884	14.595	0.184181
1885	14.601	0.186455
1886	14.607	0.179318
1887	14.613	0.17794
1888	14.619	0.182955
1889	14.625	0.179879
1890	14.631	0.184202
1891	14.637	0.180293
1892	14.642	0.186046
1893	14.648	0.186214
1894	14.654	0.190338
1895	14.66	0.176646
1896	14.666	0.171134
1897	14.672	0.180854
1898	14.678	0.182714
1899	14.684	0.183536
1900	14.69	0.178008
1901	14.696	0.183285
1902	14.702	0.196159
1903	14.708	0.176022
1904	14.714	0.183343
1905	14.72	0.191171
1906	14.726	0.187388
1907	14.732	0.174005
1908	14.738	0.183075
1909	14.744	0.185271
1910	14.749	0.185197
1911	14.755	0.181503
1912	14.761	0.186492
1913	14.767	0.180775
1914	14.773	0.178611
1915	14.779	0.176206
1916	14.785	0.192428
1917	14.791	0.174545
1918	14.797	0.186465
1919	14.803	0.187927
1920	14.809	0.180005
1921	14.815	0.186555
1922	14.821	0.181797
1923	14.827	0.174105
1924	14.833	0.192517
1925	14.839	0.185024
1926	14.845	0.196767
1927	14.851	0.187644
1928	14.857	0.181545
1929	14.862	0.187293
1930	14.868	0.177463
1931	14.874	0.187864
1932	14.88	0.18732
1933	14.886	0.182405
1934	14.892	0.171307
1935	14.898	0.179124
1936	14.904	0.18306
1937	14.91	0.188195
1938	14.916	0.178391
1939	14.922	0.183977
1940	14.928	0.182635
1941	14.934	0.186974
1942	14.94	0.186156
1943	14.946	0.185973
1944	14.952	0.18329
1945	14.958	0.185024
1946	14.964	0.180712
1947	14.969	0.183311
1948	14.975	0.180974
1949	14.981	0.188504
1950	14.987	0.194372
1951	14.993	0.180256
1952	14.999	0.18918
1953	15.005	0.185082
1954	15.011	0.177699
1955	15.017	0.188572
1956	15.023	0.18657
1957	15.029	0.181629
1958	15.035	0.183002
1959	15.041	0.184254
1960	15.047	0.182798
1961	15.053	0.185197
1962	15.059	0.182415
1963	15.065	0.187623
1964	15.071	0.187351
1965	15.077	0.186507
1966	15.082	0.184783
1967	15.088	0.183552
1968	15.094	0.18624
1969	15.1	0.190694
1970	15.106	0.183358
1971	15.112	0.188928
1972	15.118	0.189106
1973	15.124	0.187314
1974	15.13	0.186727
1975	15.136	0.177552
1976	15.142	0.171165
1977	15.148	0.185066
1978	15.154	0.188216
1979	15.16	0.181702
1980	15.166	0.184663
1981	15.172	0.186974
1982	15.178	0.194053
1983	15.184	0.18099
1984	15.189	0.189096
1985	15.195	0.18088
1986	15.201	0.190615
1987	15.207	0.187047
1988	15.213	0.186759
1989	15.219	0.17913
1990	15.225	0.188305
1991	15.231	0.186738
1992	15.237	0.191952
1993	15.243	0.187393
1994	15.249	0.177626
1995	15.255	0.175865
1996	15.261	0.18481
1997	15.267	0.186224
[truncated: 206 more rows]
