# Supplementary material for: Engineering Escherichia coli for the production of butyl octanoate from endogenous octanoyl-CoA
Source: PeerJ. 2019 Jul 1;7:e6971. doi: 10.7717/peerj.6971 (PMC6610577; doi:10.7717/peerj.6971)
Supplement: Supplemental Information 7 [file peerj-07-6971-s007.xlsx]

## Sheet: Bradford - all samples (2)
ug BSA	Reading1	Reading 2	Average	Background
0	0.377	0.391	0	0.384
2	0.492	0.494	0.109
4	0.603	0.617	0.226
6	0.699	0.682	0.3065
8	0.789	0.778	0.3995
10	0.828	0.881	0.4705
							Autoclave in 0.1M NaOH for 1hr?
Sample	Dilution	Reading 1	Reading 2	Average	ug in sample	mg/ml
C43 WT	1000	0.615	0.624	0.2355	4652.54	4.65254
AAT	1000	0.647	0.636	0.2575	5118.64	5.11864
AAT S99G	1000	0.556	0.545	0.1665	3190.68	3.19068
AAT L178F	1000	0.575	0.576	0.1915	3720.34	3.72034
AAT S99G L178F	1000	0.569	0.561	0.181	3497.88	3.49788

## Sheet: BO ACTIVITY
area for BO	1	2	3				BO
c43	0	0	0			slope	4544
AAT	21944	21096	10939			yint	-1572
AAT S99G	53837	48754	45633
AAT L178F	26723	28666	21357
AAT S99G L178F	56961	58378	52313			20mM butanol
						0.5mM octanoyl CoA
	1	2	3			in 500ul + 100 ul 10% SDS and extracted with 150ul
c43	0.345951	0.345951	0.345951			reaction run for 1 h at 30C in shaker
AAT	5.17518	4.98856	2.7533
AAT S99G	12.1939	11.0753	10.3884
AAT L178F	6.22689	6.65449	5.04599			average	stndev	nmol in 500ul
AAT S99G L178F	12.8814	13.1932	11.8585		c43	0	0
					AAT	3.23249	1.01174
					AAT S99G	8.4102	0.683129
mg/L	1	2	3		AAT L178F	4.48633	0.625472
c43	0	0	0		AAT S99G L178F	9.49277	0.524187
AAT	1.55411	1.49806	0.826817
AAT S99G	3.66183	3.32591	3.11965
AAT L178F	1.86994	1.99835	1.51531			average	stndev	nmol/ml reaction volume
AAT S99G L178F	3.86828	3.96193	3.56111		c43	0	0
					AAT	6.46498	2.02347
					AAT S99G	16.8204	1.36626
mg/L	average	stndev			AAT L178F	8.97266	1.25094
c43	0	0			AAT S99G L178F	18.9855	1.04837
AAT	1.293	0.404694
AAT S99G	3.36913	0.273662				average	stndev	nmol/mg protein
AAT L178F	1.79453	0.250189			c43	0	0
AAT S99G L178F	3.79711	0.209675			AAT	63.1513	19.7657
					AAT S99G	263.587	21.4102
Protein conc.	mg/ml				AAT L178F	120.589	16.8122
C43 WT	4.65254				AAT S99G L178F	271.386	14.9858
AAT	5.11864
AAT S99G	3.19068					average	stndev	nmol/min/mg crude protein
AAT L178F	3.72034				c43	0	0
AAT S99G L178F	3.49788				AAT	1.05252	0.329428
					AAT S99G	4.39311	0.356836
					AAT L178F	2.00982	0.280204
					AAT S99G L178F	4.5231	0.249764
						average	stndev	umol/min/mg crude protein
					c43	0	0
					AAT	0.00105252	0.000329428
					AAT S99G	0.00439311	0.000356836
					AAT L178F	0.00200982	0.000280204
					AAT S99G L178F	0.0045231	0.000249764
