# Supplementary material for: Engineering Escherichia coli for the production of butyl octanoate from endogenous octanoyl-CoA
Source: PeerJ. 2019 Jul 1;7:e6971. doi: 10.7717/peerj.6971 (PMC6610577; doi:10.7717/peerj.6971)
Supplement: Supplemental Information 8 [file peerj-07-6971-s008.xlsx]

## Sheet: Raw Data. MC_AATSGFadE_S trace
#"+ TIC Scan MC_AATSGFadE_S4.D "
#Point
0	3.393	0.00541277
1	3.399	0.0130001
2	3.405	0.0166627
3	3.411	0.0154209
4	3.417	0.01267
5	3.422	0.0103802
6	3.428	0.00992428
7	3.434	0.00706856
8	3.44	0.00657602
9	3.446	0.00820561
10	3.452	0.00598391
11	3.458	0.00747203
12	3.464	0.00765543
13	3.47	0.00676989
14	3.476	0.00598391
15	3.482	0.00858288
16	3.488	0.004391
17	3.494	0.0102649
18	3.5	0.0119626
19	3.506	0.00697425
20	3.512	0.00925358
21	3.518	0.0091645
22	3.524	0.00736723
23	3.529	0.00636642
24	3.535	0.0100762
25	3.541	0.00881343
26	3.547	0.0102282
27	3.553	0.0085986
28	3.559	0.00693757
29	3.565	0.00766067
30	3.571	0.0072048
31	3.577	0.00479971
32	3.583	0.00460583
33	3.589	0.00663889
34	3.595	0.00688517
35	3.601	0.00409233
36	3.607	0.00584244
37	3.613	0.00471063
38	3.619	0.00988237
39	3.625	0.0130944
40	3.631	0.0304645
41	3.637	0.0651261
42	3.642	0.0912259
43	3.648	0.0675574
44	3.654	0.0439886
45	3.66	0.0165579
46	3.666	0.00537085
47	3.672	0.00450627
48	3.678	0.00784406
49	3.684	0.00813749
50	3.69	0.017412
51	3.696	0.0185753
52	3.702	0.0125914
53	3.708	0.0132673
54	3.714	0.0237051
55	3.72	0.042841
56	3.726	0.0518484
57	3.732	0.0223008
58	3.738	0.0103487
59	3.744	0.00377794
60	3.749	0.00473159
61	3.755	0.0101444
62	3.761	0.00620923
63	3.767	0.00790694
64	3.773	0.00517174
65	3.779	0.00471063
66	3.785	0.0063507
67	3.791	0.00627735
68	3.797	0.00809034
69	3.803	0.00594724
70	3.809	0.00624591
71	3.815	0.00746679
72	3.821	0.00825801
73	3.827	0.00313343
74	3.833	0.00214834
75	3.839	0.00439624
76	3.845	0.00397705
77	3.851	0.00287144
78	3.857	0.00751395
79	3.862	0.0062983
80	3.868	0.01147
81	3.874	0.0102963
82	3.88	0.0101077
83	3.886	0.0128481
84	3.892	0.0120674
85	3.898	0.0188582
86	3.904	0.0589169
87	3.91	0.10966
88	3.916	0.0846079
89	3.922	0.0299562
90	3.928	0.0117478
91	3.934	0.00978805
92	3.94	0.0243706
93	3.946	0.0476355
94	3.952	0.0546517
95	3.958	0.0374912
96	3.964	0.0341481
97	3.969	0.0580576
98	3.975	0.0863214
99	3.981	0.0735204
100	3.987	0.0488931
101	3.993	0.0237523
102	3.999	0.0136865
103	4.005	0.0143677
104	4.011	0.0169352
105	4.017	0.0170767
106	4.023	0.0133145
107	4.029	0.00922738
108	4.035	0.00855668
109	4.041	0.00984045
110	4.047	0.017454
111	4.053	0.0203568
112	4.059	0.0117163
113	4.065	0.00804842
114	4.071	0.00866148
115	4.077	0.0063507
116	4.082	0.00788598
117	4.088	0.00751395
118	4.094	0.00615159
119	4.1	0.00594724
120	4.106	0.00732008
121	4.112	0.00517174
122	4.118	0.00363646
123	4.124	0.00585816
124	4.13	0.00346354
125	4.136	0.0056014
126	4.142	0.0079803
127	4.148	0.00620399
128	4.154	0.00616207
129	4.16	0.0140952
130	4.166	0.0224633
131	4.172	0.0464827
132	4.178	0.0822186
133	4.184	0.110362
134	4.189	0.0773507
135	4.195	0.0332836
136	4.201	0.0131049
137	4.207	0.00750871
138	4.213	0.00497262
139	4.219	0.00761875
140	4.225	0.00835233
141	4.231	0.0049045
142	4.237	0.00576908
143	4.243	0.00901255
144	4.249	0.00540753
145	4.255	0.0101496
146	4.261	0.00926406
147	4.267	0.0130368
148	4.273	0.00735676
149	4.279	0.0113181
150	4.285	0.00864576
151	4.291	0.0175483
152	4.297	0.0401582
153	4.302	0.0420132
154	4.308	0.0206607
155	4.314	0.00987189
156	4.32	0.00496738
157	4.326	0.00432288
158	4.332	0.00611491
159	4.338	0.0157196
160	4.344	0.025298
161	4.35	0.015882
162	4.356	0.00939506
163	4.362	0.00268805
164	4.368	0.00303388
165	4.374	0.00485734
166	4.38	0.00658126
167	4.386	0.00987189
168	4.392	0.00700569
169	4.398	0.00503026
170	4.404	0.00420236
171	4.409	0.00682753
172	4.415	0.00755587
173	4.421	0.0104326
174	4.427	0.00575336
175	4.433	0.00754015
176	4.439	0.00773927
177	4.445	0.00416044
178	4.451	0.00934266
179	4.457	0.00339019
180	4.463	0.00476827
181	4.469	0.00334303
182	4.475	0.00522414
183	4.481	0.0020645
184	4.487	0.00387225
185	4.493	0.00492546
186	4.499	0.00465823
187	4.505	0.00397705
188	4.511	0.00611491
189	4.517	0.00503026
190	4.522	0.00359978
191	4.528	0.00441196
192	4.534	0.00128376
193	4.54	0.00426
194	4.546	0.00277712
195	4.552	0.00545993
196	4.558	0.00512982
197	4.564	0.00585292
198	4.57	0.00473683
199	4.576	0.00258849
200	4.582	0.00443292
201	4.588	0.00483639
202	4.594	0.00504598
203	4.6	0.00482591
204	4.606	0.00462155
205	4.612	0.00248369
206	4.618	0.00341114
207	4.624	0.00350022
208	4.629	0.00394561
209	4.635	0.00247321
210	4.641	0.00319631
211	4.647	0.00274568
212	4.653	0.0041814
213	4.659	0.010574
214	4.665	0.0916398
215	4.671	0.443349
216	4.677	1.11479
217	4.683	1.58031
218	4.689	1.33134
219	4.695	0.719872
220	4.701	0.305347
221	4.707	0.133952
222	4.713	0.0716602
223	4.719	0.0463937
224	4.725	0.0351542
225	4.731	0.0252718
226	4.737	0.0200739
227	4.742	0.0146664
228	4.748	0.0141004
229	4.754	0.0132568
230	4.76	0.00938982
231	4.766	0.00776022
232	4.772	0.00801174
233	4.778	0.0087296
234	4.784	0.00880295
235	4.79	0.00605727
236	4.796	0.0093741
237	4.802	0.0103016
238	4.808	0.0132202
239	4.814	0.0175168
240	4.82	0.0196757
241	4.826	0.0159449
242	4.832	0.015992
243	4.838	0.0118106
244	4.844	0.0100658
245	4.849	0.00765543
246	4.855	0.0071
247	4.861	0.00701093
248	4.867	0.0035631
249	4.873	0.00789646
250	4.879	0.00306531
251	4.885	0.00247321
252	4.891	0.00412376
253	4.897	0.00441196
254	4.903	0.00393513
255	4.909	0.00482591
256	4.915	0.00261469
257	4.921	0.00383033
258	4.927	0.00296052
259	4.933	0.00708428
260	4.939	0.00504074
261	4.945	0.00859336
262	4.951	0.00541277
263	4.957	0.0115277
264	4.962	0.0166365
265	4.968	0.0141528
266	4.974	0.00853572
267	4.98	0.00660222
268	4.986	0.00290812
269	4.992	0.00299196
270	4.998	0.00285048
271	5.004	0.00307055
272	5.01	0.0015772
273	5.016	0.00260945
274	5.022	0.00749299
275	5.028	0.00631926
276	5.034	0.00563808
277	5.04	0.00641882
278	5.046	0.00667034
279	5.052	0.0070738
280	5.058	0.00692185
281	5.064	0.00768163
282	5.069	0.00540753
283	5.075	0.00377269
284	5.081	0.00537085
285	5.087	0.00724672
286	5.093	0.00522414
287	5.099	0.00517174
288	5.105	0.00495166
289	5.111	0.00186015
290	5.117	0.00384605
291	5.123	0.00833661
292	5.129	0.00902303
293	5.135	0.0110194
294	5.141	0.0169719
295	5.147	0.0572768
296	5.153	0.147801
297	5.159	0.146852
298	5.165	0.0705127
299	5.171	0.0172339
300	5.177	0.00838377
301	5.182	0.00805366
302	5.188	0.00596295
303	5.194	0.00536037
304	5.2	0.00534465
305	5.206	0.00506694
306	5.212	0.0072572
307	5.218	0.00391417
308	5.224	0.00389845
309	5.23	0.004129
310	5.236	0.00783882
311	5.242	0.0153895
312	5.248	0.017433
313	5.254	0.00850952
314	5.26	0.00685373
315	5.266	0.00615159
316	5.272	0.00304435
317	5.278	0.00486258
318	5.284	0.0049045
319	5.289	0.00468967
320	5.295	0.00881867
321	5.301	0.0162959
322	5.307	0.0138647
323	5.313	0.0105007
324	5.319	0.0247007
325	5.325	0.0514292
326	5.331	0.0548456
327	5.337	0.0311457
328	5.343	0.0129844
329	5.349	0.013152
330	5.355	0.00873484
331	5.361	0.00598915
332	5.367	0.00580576
333	5.373	0.00636642
334	5.379	0.00708952
335	5.385	0.00334303
336	5.391	0.0036417
337	5.397	0.0071524
338	5.402	0.0122298
339	5.408	0.0129162
340	5.414	0.00752443
341	5.42	0.00331159
342	5.426	0.000843617
343	5.432	0.00470539
344	5.438	0.00463727
345	5.444	0.00170819
346	5.45	0.00489402
347	5.456	0.00953654
348	5.462	0.0133669
349	5.468	0.0112814
350	5.474	0.0108675
351	5.48	0.01857
352	5.486	0.0352275
353	5.492	0.0383453
354	5.498	0.0597658
355	5.504	0.0805261
356	5.509	0.0627577
357	5.515	0.0208022
358	5.521	0.0111609
359	5.527	0.00492546
360	5.533	0.00576384
361	5.539	0.00279808
362	5.545	0.00189159
363	5.551	0.00730436
364	5.557	0.0128796
365	5.563	0.0229925
366	5.569	0.0215253
367	5.575	0.00844141
368	5.581	0.00489926
369	5.587	0.00637166
370	5.593	0.00560664
371	5.599	0.00335351
372	5.605	0.0101024
373	5.611	0.0111242
374	5.617	0.00882391
375	5.622	0.00711572
376	5.628	0.00548613
377	5.634	0.00242605
378	5.64	0.00266185
379	5.646	0.00313867
380	5.652	0.00220074
381	5.658	0.0152427
382	5.664	0.0171396
383	5.67	0.0073096
384	5.676	0.00350022
385	5.682	0.000550185
386	5.688	0.0070214
387	5.694	0.00623019
388	5.7	0.00260945
389	5.706	0.00127329
390	5.712	0.00181299
391	5.718	0.00252037
392	5.724	0.00167151
393	5.729	0
394	5.735	0.00555425
395	5.741	0.0104797
396	5.747	0.00766067
397	5.753	0.00580576
398	5.759	0.00714192
399	5.765	0.008782
400	5.771	0.00395085
401	5.777	0.00218502
402	5.783	0.00422856
403	5.789	0.00509838
404	5.795	0.0035631
405	5.801	0.00222694
406	5.807	0.00543373
407	5.813	0.00685373
408	5.819	0.00359454
409	5.825	0.00417092
410	5.831	0.00419712
411	5.837	0.00367314
412	5.842	0.00832613
413	5.848	0.00630354
414	5.854	0.00628783
415	5.86	0.00587912
416	5.866	0.00905971
417	5.872	0.0113757
418	5.878	0.00782834
419	5.884	0.0150593
420	5.89	0.0289712
421	5.896	0.0238885
422	5.902	0.0155152
423	5.908	0.00817417
424	5.914	0.00566952
425	5.92	0.00249417
426	5.926	0.00396657
427	5.932	0.00604679
428	5.938	0.00307579
429	5.944	0.00291336
430	5.949	0.00598391
431	5.955	0.00714192
432	5.961	0.0121303
433	5.967	0.0127328
434	5.973	0.0120097
435	5.979	0.00844664
436	5.985	0.00816369
437	5.991	0.00494118
438	5.997	0.00576384
439	6.003	0.00504598
440	6.009	0.00569048
441	6.015	0.00649742
442	6.021	0.00795934
443	6.027	0.0132044
444	6.033	0.0130368
445	6.039	0.00739867
446	6.045	0.00836281
447	6.051	0.00705808
448	6.057	0.00697949
449	6.062	0.0110404
450	6.068	0.00656554
451	6.074	0.00696901
452	6.08	0.00737247
453	6.086	0.00523461
454	6.092	0.00437004
455	6.098	0.00510886
456	6.104	0.00541801
457	6.11	0.00385653
458	6.116	0.00253085
459	6.122	0.00687469
460	6.128	0.00372554
461	6.134	0.0079017
462	6.14	0.0051141
463	6.146	0.00270901
464	6.152	0.00529225
465	6.158	0.00474207
466	6.164	0.00425476
467	6.169	0.00167151
468	6.175	0.00470015
469	6.181	0.0109146
470	6.187	0.0146768
471	6.193	0.0135083
472	6.199	0.0123451
473	6.205	0.00932694
474	6.211	0.00698997
475	6.217	0.00912783
476	6.223	0.00391941
477	6.229	0.00613587
478	6.235	0.00303388
479	6.241	0.00298148
480	6.247	0.00396133
481	6.253	0.00384605
482	6.259	0.00390893
483	6.265	0.00435956
484	6.271	0.0056538
485	6.277	0.00607299
486	6.282	0.00925358
487	6.288	0.00414473
488	6.294	0.00576384
489	6.3	0.00607299
490	6.306	0.00923262
491	6.312	0.00788074
492	6.318	0.00270901
493	6.324	0.00293956
494	6.33	0.00388273
495	6.336	0.0013414
496	6.342	0.00259897
497	6.348	0.00247321
498	6.354	0.000838377
499	6.36	0.00411329
500	6.366	0.00513506
501	6.372	0.00543373
502	6.378	0.00603107
503	6.384	0.0085724
504	6.389	0.00760827
505	6.395	0.00268805
506	6.401	0.00322251
507	6.407	0.00186015
508	6.413	0.00388273
509	6.419	0.00426524
510	6.425	0.00497262
511	6.431	0.0049045
512	6.437	0.0133302
513	6.443	0.00822133
514	6.449	0.00625115
515	6.455	0.00298148
516	6.461	0.00207498
517	6.467	0.00159816
518	6.473	0.00301292
519	6.479	0.00443292
520	6.485	0.0036155
521	6.491	0.00564332
522	6.497	0.00767115
523	6.502	0.00579528
524	6.508	0.00497262
525	6.514	0.0057848
526	6.52	0.00449056
527	6.526	0.00363646
528	6.532	0.00746155
529	6.538	0.00411853
530	6.544	0.00530797
531	6.55	0.00489926
532	6.556	0.00599439
533	6.562	0.00827373
534	6.568	0.00962037
535	6.574	0.012387
536	6.58	0.00668605
537	6.586	0.00716288
538	6.592	0.0107836
539	6.598	0.0281799
540	6.604	0.0798921
541	6.609	0.124148
542	6.615	0.0972569
543	6.621	0.0432026
544	6.627	0.0144148
545	6.633	0.00860384
546	6.639	0.0100134
547	6.645	0.00899683
548	6.651	0.00980377
549	6.657	0.0079279
550	6.663	0.00793838
551	6.669	0.00960465
552	6.675	0.0127852
553	6.681	0.0100029
554	6.687	0.00741439
555	6.693	0.00782834
556	6.699	0.00654458
557	6.705	0.00751919
558	6.711	0.000398229
559	6.717	0.00260421
560	6.722	0.00465823
561	6.728	0.00545469
562	6.734	0.00576908
563	6.74	0.00677513
564	6.746	0.0117425
565	6.752	0.0111504
566	6.758	0.0131154
567	6.764	0.0126647
568	6.77	0.010312
569	6.776	0.0084938
570	6.782	0.00813749
571	6.788	0.00648694
572	6.794	0.0121722
573	6.8	0.0141214
574	6.806	0.0139433
575	6.812	0.0120517
576	6.818	0.0226886
577	6.824	0.0790642
578	6.829	0.183919
579	6.835	0.165847
580	6.841	0.0729493
581	6.847	0.0193193
582	6.853	0.00847284
583	6.859	0.0115696
584	6.865	0.0131782
585	6.871	0.0143991
586	6.877	0.0162173
587	6.883	0.0206083
588	6.889	0.0150855
589	6.895	0.0137022
590	6.901	0.023223
591	6.907	0.0462732
592	6.913	0.0584506
593	6.919	0.031874
594	6.925	0.0183657
595	6.931	0.0193979
596	6.937	0.0280018
597	6.942	0.0229977
598	6.948	0.0117111
599	6.954	0.0126542
600	6.96	0.012015
601	6.966	0.0216458
602	6.972	0.0398124
603	6.978	0.061474
604	6.984	0.0769315
605	6.99	0.0704551
606	6.996	0.0535304
607	7.002	0.0398858
608	7.008	0.0285415
609	7.014	0.0237261
610	7.02	0.0183395
611	7.026	0.0160916
612	7.032	0.0134979
613	7.038	0.0107417
614	7.044	0.0104535
615	7.049	0.0101968
616	7.055	0.0148288
617	7.061	0.0145563
618	7.067	0.00978281
619	7.073	0.0126176
620	7.079	0.00529749
621	7.085	0.00880295
622	7.091	0.0101968
623	7.097	0.0111452
624	7.103	0.00601011
625	7.109	0.00810082
626	7.115	0.00832613
627	7.121	0.0106945
628	7.127	0.00848332
629	7.133	0.00743011
630	7.139	0.0119416
631	7.145	0.0175954
632	7.151	0.0151065
633	7.157	0.0162959
634	7.162	0.0149807
635	7.168	0.020383
636	7.174	0.0303754
637	7.18	0.0253295
638	7.186	0.0241557
639	7.192	0.0189945
640	7.198	0.017585
641	7.204	0.0167099
642	7.21	0.0151746
643	7.216	0.0126438
644	7.222	0.0137599
645	7.228	0.0146926
646	7.234	0.0203149
647	7.24	0.021541
648	7.246	0.0226362
649	7.252	0.0221122
650	7.258	0.0194608
651	7.264	0.0170767
652	7.27	0.0110037
653	7.275	0.0133407
654	7.281	0.0177788
655	7.287	0.0118578
656	7.293	0.00694805
657	7.299	0.00896539
658	7.305	0.0109461
659	7.311	0.0133669
660	7.317	0.0131678
661	7.323	0.0152008
662	7.329	0.00860908
663	7.335	0.0115382
664	7.341	0.00894967
665	7.347	0.0107103
666	7.353	0.00965705
667	7.359	0.00965181
668	7.365	0.0100029
669	7.371	0.005811
670	7.377	0.0108151
671	7.382	0.0144987
672	7.388	0.0148655
673	7.394	0.0109985
674	7.4	0.0133616
675	7.406	0.00994524
676	7.412	0.00911211
677	7.418	0.0084938
678	7.424	0.00883963
679	7.43	0.00786502
680	7.436	0.00710524
681	7.442	0.00991904
682	7.448	0.00975137
683	7.454	0.00910163
684	7.46	0.00810605
685	7.466	0.0118997
686	7.472	0.00698997
687	7.478	0.00693233
688	7.484	0.010726
689	7.49	0.00995048
690	7.495	0.0124185
691	7.501	0.00925358
692	7.507	0.00853572
693	7.513	0.00648694
694	7.519	0.012932
695	7.525	0.0138594
696	7.531	0.0106579
697	7.537	0.011512
698	7.543	0.00963085
699	7.549	0.0110666
700	7.555	0.00935838
701	7.561	0.011098
702	7.567	0.00818989
703	7.573	0.00825277
704	7.579	0.0059158
705	7.585	0.00906495
706	7.591	0.00820561
707	7.597	0.00947366
708	7.602	0.00758731
709	7.608	0.00955225
710	7.614	0.00692709
711	7.62	0.00592103
712	7.626	0.0148393
713	7.632	0.0143153
714	7.638	0.0137179
715	7.644	0.0132935
716	7.65	0.0115382
717	7.656	0.0105793
718	7.662	0.00719432
719	7.668	0.00685897
720	7.674	0.0078231
721	7.68	0.00725196
722	7.686	0.00882391
723	7.692	0.0100605
724	7.698	0.0240562
725	7.704	0.0338442
726	7.71	0.0337709
727	7.715	0.0236213
728	7.721	0.0196023
729	7.727	0.0145039
730	7.733	0.0161126
731	7.739	0.0105059
732	7.745	0.0142524
733	7.751	0.0104378
734	7.757	0.00901779
735	7.763	0.00934266
736	7.769	0.00664413
737	7.775	0.00892347
738	7.781	0.0102754
739	7.787	0.00642406
740	7.793	0.00463727
741	7.799	0.00877152
742	7.805	0.00866148
743	7.811	0.0108151
744	7.817	0.00898111
745	7.822	0.0129686
746	7.828	0.0105478
747	7.834	0.00959417
748	7.84	0.0113181
749	7.846	0.0119678
750	7.852	0.0128638
751	7.858	0.0113181
752	7.864	0.0127381
753	7.87	0.00947366
754	7.876	0.01005
755	7.882	0.00969373
756	7.888	0.00963085
757	7.894	0.00681705
758	7.9	0.011339
759	7.906	0.0204302
760	7.912	0.0405827
761	7.918	0.039367
762	7.924	0.0321255
763	7.93	0.0230344
764	7.935	0.0157982
765	7.941	0.0159187
766	7.947	0.00957321
767	7.953	0.00964657
768	7.959	0.0106212
769	7.965	0.0109408
770	7.971	0.0110928
771	7.977	0.0110928
772	7.983	0.0110928
773	7.989	0.0110928
774	7.995	0.019416
775	8.001	0.0136603
776	8.007	0.0355757
777	8.013	0.0983953
778	8.019	0.15768
779	8.025	0.114814
780	8.031	0.0570138
781	8.037	0.0365422
782	8.042	0.0234245
783	8.048	0.0137651
784	8.054	0.0138175
785	8.06	0.0181351
786	8.066	0.0136393
787	8.072	0.0144777
788	8.078	0.0188582
789	8.084	0.026587
790	8.09	0.033163
791	8.096	0.0249365
792	8.102	0.0184705
793	8.108	0.0164793
794	8.114	0.0173387
795	8.12	0.0138751
796	8.126	0.0161178
797	8.132	0.0222641
798	8.138	0.0212005
799	8.144	0.0277555
800	8.15	0.0258482
801	8.155	0.0306427
802	8.161	0.0308994
803	8.167	0.0255181
804	8.173	0.0233436
805	8.179	0.0236841
806	8.185	0.0219864
807	8.191	0.017695
808	8.197	0.0181194
809	8.203	0.0198224
810	8.209	0.0179779
811	8.215	0.0211323
812	8.221	0.0182871
813	8.227	0.0159292
814	8.233	0.0107627
815	8.239	0.0154942
816	8.245	0.0177474
817	8.251	0.0213472
818	8.257	0.0171605
819	8.262	0.0183605
820	8.268	0.0206712
821	8.274	0.021452
822	8.28	0.0177893
823	8.286	0.0201944
824	8.292	0.0218764
825	8.298	0.0204931
826	8.304	0.0212476
827	8.31	0.0222275
828	8.316	0.0212162
829	8.322	0.0351856
830	8.328	0.0595667
831	8.334	0.0703188
832	8.34	0.0576541
833	8.346	0.0357515
834	8.352	0.0266551
835	8.358	0.0196075
836	8.364	0.0224213
837	8.37	0.0185805
838	8.375	0.0172915
839	8.381	0.016034
840	8.387	0.015992
841	8.393	0.0145982
842	8.399	0.0159292
843	8.405	0.0131101
844	8.411	0.0163588
845	8.417	0.0145616
846	8.423	0.0167256
847	8.429	0.0112709
848	8.435	0.0128743
849	8.441	0.0193613
850	8.447	0.0192617
851	8.453	0.0231864
852	8.459	0.0202678
853	8.465	0.0157405
854	8.471	0.0113967
855	8.477	0.0113128
856	8.482	0.0130001
857	8.488	0.0149179
858	8.494	0.0124185
859	8.5	0.0184914
860	8.506	0.0126595
861	8.512	0.0166261
862	8.518	0.0160864
863	8.524	0.0141843
864	8.53	0.0154628
865	8.536	0.012539
866	8.542	0.0152061
867	8.548	0.0142681
868	8.554	0.0170452
869	8.56	0.0158506
870	8.566	0.0161283
871	8.572	0.0142681
872	8.578	0.0145511
873	8.584	0.017061
874	8.59	0.020142
875	8.595	0.0183028
876	8.601	0.0194818
877	8.607	0.0132202
878	8.613	0.0121303
879	8.619	0.0166889
880	8.625	0.0153318
881	8.631	0.0137075
882	8.637	0.00969373
883	8.643	0.0143677
884	8.649	0.0161859
885	8.655	0.0144934
886	8.661	0.0165317
887	8.667	0.0136655
888	8.673	0.0143572
889	8.679	0.0142105
890	8.685	0.0140323
891	8.691	0.0153737
892	8.697	0.0151641
893	8.702	0.0135817
894	8.708	0.0124132
895	8.714	0.0175378
896	8.72	0.0154104
897	8.726	0.0209909
898	8.732	0.0206922
899	8.738	0.015882
900	8.744	0.0121041
901	8.75	0.0143362
902	8.756	0.0131206
903	8.762	0.0161964
904	8.768	0.0155833
905	8.774	0.0148864
906	8.78	0.0170924
907	8.786	0.0213262
908	8.792	0.0210013
909	8.798	0.0175692
910	8.804	0.0176583
911	8.81	0.0140742
912	8.815	0.0188216
913	8.821	0.0156619
914	8.827	0.0183814
915	8.833	0.0187063
916	8.839	0.0148759
917	8.845	0.0145982
918	8.851	0.0185334
919	8.857	0.0180723
920	8.863	0.0162278
921	8.869	0.0181823
922	8.875	0.019639
923	8.881	0.0164636
924	8.887	0.015641
925	8.893	0.0148235
926	8.899	0.0165422
927	8.905	0.0145878
928	8.911	0.0156776
929	8.917	0.0144934
930	8.922	0.0122613
931	8.928	0.0123346
932	8.934	0.01136
933	8.94	0.0140166
934	8.946	0.0155519
935	8.952	0.0164531
936	8.958	0.0174592
937	8.964	0.0140376
938	8.97	0.0147397
939	8.976	0.0122141
940	8.982	0.0139433
941	8.988	0.0168933
942	8.994	0.0147607
943	9	0.0158506
944	9.006	0.0174016
945	9.012	0.0107207
946	9.018	0.0149283
947	9.024	0.0142157
948	9.03	0.0159082
949	9.035	0.0176059
950	9.041	0.0161702
951	9.047	0.0150698
952	9.053	0.0139904
953	9.059	0.0172758
954	9.065	0.0181142
955	9.071	0.0192355
956	9.077	0.0150174
957	9.083	0.0183185
958	9.089	0.0189735
959	9.095	0.0208389
960	9.101	0.0251565
961	9.107	0.0249889
962	9.113	0.0210066
963	9.119	0.0178574
964	9.125	0.0199691
965	9.131	0.0174016
966	9.137	0.0193927
967	9.142	0.0177474
968	9.148	0.0181509
969	9.154	0.0155571
970	9.16	0.0151379
971	9.166	0.0171238
972	9.172	0.0184914
973	9.178	0.0112709
974	9.184	0.0154785
975	9.19	0.0219288
976	9.196	0.0175064
977	9.202	0.0188687
978	9.208	0.0196495
979	9.214	0.0222484
980	9.22	0.0199638
981	9.226	0.0194346
982	9.232	0.0177474
983	9.238	0.0200896
984	9.244	0.0189316
985	9.25	0.0189159
986	9.255	0.0223061
987	9.261	0.0283214
988	9.267	0.0321151
989	9.273	0.0276455
990	9.279	0.0210171
991	9.285	0.0250308
992	9.291	0.0281433
993	9.297	0.0281171
994	9.303	0.0322199
995	9.309	0.0284105
996	9.315	0.0223899
997	9.321	0.02556
998	9.327	0.0324661
999	9.333	0.0387644
1000	9.339	0.0464408
1001	9.345	0.0386963
1002	9.351	0.0330425
1003	9.357	0.0235479
1004	9.362	0.0192722
1005	9.368	0.020645
1006	9.374	0.0226781
1007	9.38	0.0255862
1008	9.386	0.0244125
1009	9.392	0.0257067
1010	9.398	0.0260578
1011	9.404	0.0279703
1012	9.41	0.0278393
1013	9.416	0.0245225
1014	9.422	0.0220179
1015	9.428	0.0225157
1016	9.434	0.021583
1017	9.44	0.0298305
1018	9.446	0.0359035
1019	9.452	0.0360397
1020	9.458	0.0344992
1021	9.464	0.0331106
1022	9.47	0.027483
1023	9.475	0.0300139
1024	9.481	0.028924
1025	9.487	0.0269329
1026	9.493	0.0247898
1027	9.499	0.023616
1028	9.505	0.0214939
1029	9.511	0.0196861
1030	9.517	0.0222484
1031	9.523	0.0265346
1032	9.529	0.0254919
1033	9.535	0.0279179
1034	9.541	0.0279337
1035	9.547	0.0247688
1036	9.553	0.0224109
1037	9.559	0.0207131
1038	9.565	0.0205926
1039	9.571	0.0243234
1040	9.577	0.0236789
1041	9.582	0.0243758
1042	9.588	0.0261416
1043	9.594	0.0222065
1044	9.6	0.0252194
1045	9.606	0.0258272
1046	9.612	0.0251932
1047	9.618	0.0229034
1048	9.624	0.0207289
1049	9.63	0.021955
1050	9.636	0.0230868
1051	9.642	0.0212528
1052	9.648	0.0206869
1053	9.654	0.0250308
1054	9.66	0.0208284
1055	9.666	0.0227986
1056	9.672	0.0229925
1057	9.678	0.0226833
1058	9.684	0.0258639
1059	9.69	0.0234379
1060	9.695	0.0220179
1061	9.701	0.0207184
1062	9.707	0.0220231
1063	9.713	0.0247374
1064	9.719	0.0233121
1065	9.725	0.0256334
1066	9.731	0.0248788
1067	9.737	0.0259792
1068	9.743	0.030606
1069	9.749	0.0303021
1070	9.755	0.0255129
1071	9.761	0.0249889
1072	9.767	0.0260473
1073	9.773	0.0239461
1074	9.779	0.0255652
1075	9.785	0.0268595
1076	9.791	0.0242291
1077	9.797	0.0266604
1078	9.802	0.028552
1079	9.808	0.0265189
1080	9.814	0.022851
1081	9.82	0.0241557
1082	9.826	0.0260788
1083	9.832	0.0255495
1084	9.838	0.024271
1085	9.844	0.0296104
1086	9.85	0.0261783
1087	9.856	0.0248893
1088	9.862	0.0241295
1089	9.868	0.0265032
1090	9.874	0.0300244
1091	9.88	0.0259478
1092	9.886	0.0249155
1093	9.892	0.0300139
1094	9.898	0.0275512
1095	9.904	0.0318531
1096	9.91	0.02556
1097	9.915	0.0331159
1098	9.921	0.030344
1099	9.927	0.0272996
1100	9.933	0.0280542
1101	9.939	0.0275616
1102	9.945	0.0234274
1103	9.951	0.0277293
1104	9.957	0.0298881
1105	9.963	0.0282219
1106	9.969	0.0321727
1107	9.975	0.0261574
1108	9.981	0.0319684
1109	9.987	0.029448
1110	9.993	0.0302968
1111	9.999	0.0295213
1112	10.005	0.0279913
1113	10.011	0.0250779
1114	10.017	0.0256019
1115	10.022	0.0271686
1116	10.028	0.0299877
1117	10.034	0.0318845
1118	10.04	0.0298043
1119	10.046	0.0349655
1120	10.052	0.0325343
1121	10.058	0.0311143
1122	10.064	0.0327543
1123	10.07	0.0318531
1124	10.076	0.0357358
1125	10.082	0.0313134
1126	10.088	0.0339962
1127	10.094	0.0315492
1128	10.1	0.0338495
1129	10.106	0.0383715
1130	10.112	0.0359192
1131	10.118	0.0378527
1132	10.124	0.0370667
1133	10.13	0.0344887
1134	10.135	0.0390055
1135	10.141	0.0331683
1136	10.147	0.0370196
1137	10.153	0.0383086
1138	10.159	0.0343106
1139	10.165	0.0359454
1140	10.171	0.0338652
1141	10.177	0.0336241
1142	10.183	0.0377531
1143	10.189	0.0372239
1144	10.195	0.0415887
1145	10.201	0.041049
1146	10.207	0.041945
1147	10.213	0.0448427
1148	10.219	0.0386649
1149	10.225	0.0428306
1150	10.231	0.0457596
1151	10.237	0.0467919
1152	10.242	0.0426
1153	10.248	0.0459535
1154	10.254	0.0462836
1155	10.26	0.0505751
1156	10.266	0.0450627
1157	10.272	0.0470696
1158	10.278	0.0501873
1159	10.284	0.0557259
1160	10.29	0.055883
1161	10.296	0.049307
1162	10.302	0.0528858
1163	10.308	0.0539548
1164	10.314	0.0633184
1165	10.32	0.0670963
1166	10.326	0.069229
1167	10.332	0.0678037
1168	10.338	0.0747413
1169	10.344	0.0644135
1170	10.35	0.0724619
1171	10.355	0.0720847
1172	10.361	0.0748618
1173	10.367	0.0674055
1174	10.373	0.0754906
1175	10.379	0.0748985
1176	10.385	0.0798711
1177	10.391	0.0780005
1178	10.397	0.0761089
1179	10.403	0.0870864
1180	10.409	0.0870707
1181	10.415	0.0903665
1182	10.421	0.0876575
1183	10.427	0.102806
1184	10.433	0.268349
1185	10.439	1.88841
1186	10.445	9.48995
1187	10.451	25.8555
1188	10.457	44.6107
1189	10.462	61.7843
1190	10.468	76.838
1191	10.474	91.4311
1192	10.48	100
1193	10.486	83.841
1194	10.492	35.2058
1195	10.498	9.91631
1196	10.504	3.64488
1197	10.51	1.93612
1198	10.516	1.29543
1199	10.522	0.983646
1200	10.528	0.804763
1201	10.534	0.681726
1202	10.54	0.57641
1203	10.546	0.518075
1204	10.552	0.47341
1205	10.558	0.414404
1206	10.564	0.393943
1207	10.57	0.362357
1208	10.575	0.342854
1209	10.581	0.324504
1210	10.587	0.299327
1211	10.593	0.280793
1212	10.599	0.260085
1213	10.605	0.247143
1214	10.611	0.245314
1215	10.617	0.233891
1216	10.623	0.237549
1217	10.629	0.21561
1218	10.635	0.220414
1219	10.641	0.206141
1220	10.647	0.189808
1221	10.653	0.189693
1222	10.659	0.1941
1223	10.665	0.184941
1224	10.671	0.18854
1225	10.677	0.174068
1226	10.682	0.174361
1227	10.688	0.165181
1228	10.694	0.175247
1229	10.7	0.160413
1230	10.706	0.161723
1231	10.712	0.157714
1232	10.718	0.157238
1233	10.724	0.153512
1234	10.73	0.155597
1235	10.736	0.147874
1236	10.742	0.145961
1237	10.748	0.149614
1238	10.754	0.147135
1239	10.76	0.144866
1240	10.766	0.144086
1241	10.772	0.135754
1242	10.778	0.135838
1243	10.784	0.13196
1244	10.79	0.134853
1245	10.795	0.137661
1246	10.801	0.139312
1247	10.807	0.134408
1248	10.813	0.127376
1249	10.819	0.135183
1250	10.825	0.132809
1251	10.831	0.131007
1252	10.837	0.136289
1253	10.843	0.13063
1254	10.849	0.124452
1255	10.855	0.122571
1256	10.861	0.125877
1257	10.867	0.121617
1258	10.873	0.126626
1259	10.879	0.117336
1260	10.885	0.120894
1261	10.891	0.123692
1262	10.897	0.119741
1263	10.902	0.122031
1264	10.908	0.117106
1265	10.914	0.114155
1266	10.92	0.118824
1267	10.926	0.11458
1268	10.932	0.112159
1269	10.938	0.12397
1270	10.944	0.121282
1271	10.95	0.116136
1272	10.956	0.113962
1273	10.962	0.115748
1274	10.968	0.11721
1275	10.974	0.123199
1276	10.98	0.121072
1277	10.986	0.121308
1278	10.992	0.119139
1279	10.998	0.121235
1280	11.004	0.120354
1281	11.01	0.119175
1282	11.015	0.11961
1283	11.021	0.12114
1284	11.027	0.112091
1285	11.033	0.119249
1286	11.039	0.118567
1287	11.045	0.11874
1288	11.051	0.122
1289	11.057	0.114569
1290	11.063	0.117064
1291	11.069	0.113191
1292	11.075	0.119815
1293	11.081	0.116592
1294	11.087	0.112149
1295	11.093	0.110095
1296	11.099	0.105746
1297	11.105	0.110839
1298	11.111	0.113155
1299	11.117	0.118688
1300	11.122	0.111656
1301	11.128	0.119537
1302	11.134	0.109686
1303	11.14	0.104708
1304	11.146	0.109738
1305	11.152	0.110702
1306	11.158	0.110922
1307	11.164	0.116587
1308	11.17	0.11131
1309	11.176	0.113852
1310	11.182	0.114292
1311	11.188	0.111033
1312	11.194	0.107621
1313	11.2	0.116975
1314	11.206	0.118174
1315	11.212	0.112521
1316	11.218	0.116052
1317	11.224	0.114711
1318	11.23	0.113584
1319	11.235	0.116194
1320	11.241	0.114203
1321	11.247	0.120443
1322	11.253	0.112966
1323	11.259	0.11611
1324	11.265	0.121659
1325	11.271	0.114004
1326	11.277	0.121921
1327	11.283	0.122655
1328	11.289	0.119815
1329	11.295	0.114119
1330	11.301	0.114999
1331	11.307	0.115162
1332	11.313	0.111787
1333	11.319	0.115984
1334	11.325	0.117493
1335	11.331	0.123105
1336	11.337	0.112337
1337	11.342	0.12561
1338	11.348	0.124295
1339	11.354	0.118389
1340	11.36	0.121942
1341	11.366	0.118489
1342	11.372	0.124122
1343	11.378	0.119678
1344	11.384	0.126474
1345	11.39	0.129246
1346	11.396	0.117111
1347	11.402	0.118871
1348	11.408	0.118117
1349	11.414	0.127664
1350	11.42	0.121067
1351	11.426	0.123723
1352	11.432	0.121072
1353	11.438	0.123692
1354	11.444	0.129529
1355	11.45	0.133029
1356	11.455	0.134732
1357	11.461	0.175184
1358	11.467	0.254122
1359	11.473	0.333674
1360	11.479	0.305987
1361	11.485	0.222882
1362	11.491	0.185769
1363	11.497	0.170699
1364	11.503	0.146428
1365	11.509	0.145113
1366	11.515	0.141701
1367	11.521	0.133003
1368	11.527	0.13391
1369	11.533	0.126935
1370	11.539	0.137441
1371	11.545	0.135539
1372	11.551	0.136247
1373	11.557	0.13566
1374	11.562	0.138337
1375	11.568	0.136294
1376	11.574	0.129959
1377	11.58	0.131306
1378	11.586	0.132149
1379	11.592	0.134308
1380	11.598	0.13665
1381	11.604	0.133889
1382	11.61	0.139108
1383	11.616	0.131814
1384	11.622	0.140512
1385	11.628	0.149792
1386	11.634	0.168089
1387	11.64	0.151028
1388	11.646	0.15554
1389	11.652	0.143158
1390	11.658	0.143719
1391	11.664	0.140936
1392	11.67	0.126626
1393	11.675	0.139108
1394	11.681	0.135162
1395	11.687	0.13032
1396	11.693	0.136168
1397	11.699	0.135623
1398	11.705	0.130022
1399	11.711	0.127721
1400	11.717	0.133134
1401	11.723	0.126228
1402	11.729	0.134612
1403	11.735	0.136409
1404	11.741	0.134816
1405	11.747	0.141251
1406	11.753	0.14266
1407	11.759	0.161435
1408	11.765	0.177243
1409	11.771	0.181854
1410	11.777	0.167597
1411	11.782	0.161367
1412	11.788	0.150159
1413	11.794	0.14265
1414	11.8	0.136729
1415	11.806	0.137944
1416	11.812	0.145369
1417	11.818	0.130263
1418	11.824	0.139873
1419	11.83	0.143939
1420	11.836	0.135377
1421	11.842	0.143839
1422	11.848	0.138688
1423	11.854	0.135597
1424	11.86	0.141156
1425	11.866	0.135125
1426	11.872	0.12802
1427	11.878	0.144798
1428	11.884	0.138039
1429	11.89	0.137625
1430	11.895	0.140145
1431	11.901	0.138201
1432	11.907	0.131903
1433	11.913	0.133286
1434	11.919	0.133291
1435	11.925	0.139836
1436	11.931	0.135408
1437	11.937	0.140496
1438	11.943	0.135361
1439	11.949	0.143373
1440	11.955	0.136168
1441	11.961	0.143179
1442	11.967	0.135953
1443	11.973	0.145532
1444	11.979	0.138594
1445	11.985	0.135623
1446	11.991	0.14877
1447	11.997	0.137562
1448	12.002	0.13589
1449	12.008	0.137939
1450	12.014	0.135167
1451	12.02	0.138772
1452	12.026	0.137394
1453	12.032	0.14232
1454	12.038	0.141597
1455	12.044	0.138243
1456	12.05	0.137792
1457	12.056	0.140166
1458	12.062	0.141219
1459	12.068	0.142634
1460	12.074	0.145678
1461	12.08	0.14877
1462	12.086	0.147502
1463	12.092	0.144201
1464	12.098	0.147439
1465	12.104	0.141958
1466	12.11	0.145694
1467	12.115	0.145705
1468	12.121	0.151018
1469	12.127	0.14888
1470	12.133	0.146684
1471	12.139	0.144389
1472	12.145	0.140187
1473	12.151	0.155404
1474	12.157	0.146396
1475	12.163	0.148571
1476	12.169	0.149729
1477	12.175	0.14867
1478	12.181	0.147161
1479	12.187	0.152464
1480	12.193	0.151872
1481	12.199	0.153072
1482	12.205	0.148146
1483	12.211	0.156514
1484	12.217	0.154251
1485	12.222	0.150583
1486	12.228	0.146024
1487	12.234	0.157887
1488	12.24	0.161828
1489	12.246	0.17313
1490	12.252	0.170819
1491	12.258	0.178857
1492	12.264	0.177254
1493	12.27	0.191333
1494	12.276	0.189473
1495	12.282	0.188158
1496	12.288	0.188326
1497	12.294	0.189845
1498	12.3	0.186025
1499	12.306	0.190668
1500	12.312	0.185307
1501	12.318	0.187398
1502	12.324	0.176856
1503	12.33	0.177374
1504	12.335	0.178548
1505	12.341	0.173198
1506	12.347	0.176966
1507	12.353	0.169687
1508	12.359	0.178522
1509	12.365	0.176311
1510	12.371	0.175792
1511	12.377	0.163656
1512	12.383	0.166916
1513	12.389	0.166454
1514	12.395	0.16931
1515	12.401	0.165024
1516	12.407	0.170756
1517	12.413	0.153774
1518	12.419	0.163976
1519	12.425	0.162959
1520	12.431	0.163174
1521	12.437	0.156231
1522	12.442	0.15631
1523	12.448	0.154775
1524	12.454	0.161429
1525	12.46	0.161623
1526	12.466	0.165422
1527	12.472	0.166041
1528	12.478	0.188257
1529	12.484	0.20241
1530	12.49	0.218151
1531	12.496	0.189133
1532	12.502	0.181299
1533	12.508	0.176295
1534	12.514	0.179638
1535	12.52	0.189567
1536	12.526	0.209495
1537	12.532	0.260793
1538	12.538	0.290099
1539	12.544	0.266447
1540	12.55	0.217884
1541	12.555	0.173906
1542	12.561	0.164159
1543	12.567	0.163232
1544	12.573	0.162105
1545	12.579	0.161162
1546	12.585	0.159464
1547	12.591	0.165485
1548	12.597	0.15959
1549	12.603	0.153554
1550	12.609	0.162923
1551	12.615	0.163447
1552	12.621	0.168729
1553	12.627	0.167817
1554	12.633	0.171081
1555	12.639	0.16232
1556	12.645	0.167434
1557	12.651	0.169698
1558	12.657	0.172852
1559	12.662	0.161429
1560	12.668	0.159517
1561	12.674	0.163064
1562	12.68	0.15675
1563	12.686	0.174953
1564	12.692	0.166732
1565	12.698	0.166177
1566	12.704	0.170908
1567	12.71	0.171144
1568	12.716	0.17051
1569	12.722	0.168194
1570	12.728	0.163625
1571	12.734	0.160397
1572	12.74	0.166617
1573	12.746	0.169646
1574	12.752	0.167843
1575	12.758	0.174424
1576	12.764	0.167141
1577	12.77	0.167026
1578	12.775	0.159087
1579	12.781	0.155624
1580	12.787	0.165763
1581	12.793	0.159538
1582	12.799	0.169006
1583	12.805	0.159108
1584	12.811	0.166161
1585	12.817	0.161781
1586	12.823	0.167534
1587	12.829	0.157872
1588	12.835	0.160361
1589	12.841	0.158003
1590	12.847	0.164123
1591	12.853	0.170059
1592	12.859	0.153313
1593	12.865	0.158568
1594	12.871	0.14888
1595	12.877	0.164987
1596	12.882	0.166853
1597	12.888	0.161613
1598	12.894	0.162037
1599	12.9	0.153884
1600	12.906	0.15882
1601	12.912	0.152302
1602	12.918	0.16024
1603	12.924	0.159711
1604	12.93	0.164872
1605	12.936	0.165244
1606	12.942	0.167183
1607	12.948	0.160198
1608	12.954	0.163358
1609	12.96	0.161613
1610	12.966	0.168273
1611	12.972	0.168283
1612	12.978	0.164442
1613	12.984	0.159161
1614	12.99	0.166392
1615	12.995	0.162703
1616	13.001	0.169163
1617	13.007	0.162446
1618	13.013	0.166832
1619	13.019	0.164862
1620	13.025	0.163515
1621	13.031	0.162808
1622	13.037	0.155157
1623	13.043	0.168681
1624	13.049	0.158794
1625	13.055	0.165281
1626	13.061	0.160109
1627	13.067	0.159098
1628	13.073	0.164846
1629	13.079	0.157306
1630	13.085	0.167749
1631	13.091	0.165763
1632	13.097	0.162037
1633	13.102	0.167974
1634	13.108	0.163468
1635	13.114	0.161843
1636	13.12	0.164034
1637	13.126	0.164631
1638	13.132	0.173382
1639	13.138	0.165197
1640	13.144	0.156567
1641	13.15	0.159019
1642	13.156	0.163326
1643	13.162	0.17826
1644	13.168	0.16658
1645	13.174	0.160837
1646	13.18	0.159412
1647	13.186	0.165653
1648	13.192	0.172622
1649	13.198	0.171464
1650	13.204	0.169562
1651	13.21	0.167812
1652	13.215	0.169179
1653	13.221	0.171773
1654	13.227	0.167812
1655	13.233	0.169106
1656	13.239	0.171202
1657	13.245	0.175126
1658	13.251	0.16887
1659	13.257	0.177563
1660	13.263	0.168294
1661	13.269	0.156006
1662	13.275	0.178338
1663	13.281	0.172658
1664	13.287	0.17455
1665	13.293	0.168163
1666	13.299	0.175174
1667	13.305	0.167261
1668	13.311	0.165569
1669	13.317	0.166161
1670	13.322	0.174561
1671	13.328	0.167675
1672	13.334	0.164542
1673	13.34	0.159889
1674	13.346	0.167827
1675	13.352	0.16395
1676	13.358	0.165889
1677	13.364	0.167853
1678	13.37	0.166386
1679	13.376	0.169221
1680	13.382	0.169646
1681	13.388	0.168907
1682	13.394	0.170562
1683	13.4	0.154602
1684	13.406	0.163321
1685	13.412	0.158799
1686	13.418	0.173843
1687	13.424	0.165454
1688	13.43	0.168514
1689	13.435	0.17007
1690	13.441	0.172276
1691	13.447	0.161985
1692	13.453	0.164579
1693	13.459	0.170536
1694	13.465	0.173088
1695	13.471	0.1693
1696	13.477	0.167764
1697	13.483	0.169955
1698	13.489	0.166454
1699	13.495	0.162556
1700	13.501	0.162598
1701	13.507	0.166381
1702	13.513	0.169745
1703	13.519	0.176641
1704	13.525	0.16548
1705	13.531	0.168168
1706	13.537	0.166433
1707	13.542	0.160177
1708	13.548	0.156729
1709	13.554	0.167869
1710	13.56	0.166072
1711	13.566	0.168619
1712	13.572	0.166916
1713	13.578	0.170751
1714	13.584	0.182384
1715	13.59	0.183709
1716	13.596	0.173722
1717	13.602	0.167586
1718	13.608	0.164746
1719	13.614	0.176672
1720	13.62	0.169027
1721	13.626	0.169646
1722	13.632	0.171411
1723	13.638	0.16406
1724	13.644	0.17226
1725	13.65	0.161807
1726	13.655	0.16636
1727	13.661	0.165317
1728	13.667	0.170646
1729	13.673	0.162519
1730	13.679	0.173083
1731	13.685	0.158086
1732	13.691	0.166863
1733	13.697	0.164243
1734	13.703	0.173795
1735	13.709	0.185779
1736	13.715	0.209285
1737	13.721	0.210071
1738	13.727	0.229485
1739	13.733	0.238523
1740	13.739	0.228421
1741	13.745	0.203521
1742	13.751	0.186141
1743	13.757	0.181896
1744	13.763	0.181744
1745	13.768	0.178003
1746	13.774	0.17608
1747	13.78	0.180916
1748	13.786	0.165689
1749	13.792	0.172931
1750	13.798	0.177254
1751	13.804	0.17717
1752	13.81	0.181116
1753	13.816	0.176798
1754	13.822	0.164851
1755	13.828	0.177112
1756	13.834	0.173754
1757	13.84	0.176379
1758	13.846	0.164914
1759	13.852	0.170002
1760	13.858	0.18144
1761	13.864	0.160476
1762	13.87	0.170955
1763	13.875	0.181215
1764	13.881	0.18088
1765	13.887	0.177699
1766	13.893	0.171485
1767	13.899	0.168828
1768	13.905	0.162142
1769	13.911	0.170321
1770	13.917	0.168115
1771	13.923	0.174016
1772	13.929	0.17094
1773	13.935	0.177652
1774	13.941	0.169682
1775	13.947	0.179004
1776	13.953	0.173329
1777	13.959	0.173706
1778	13.965	0.167324
1779	13.971	0.169289
1780	13.977	0.169567
1781	13.983	0.178055
1782	13.988	0.17225
1783	13.994	0.180618
1784	14	0.173602
1785	14.006	0.178008
1786	14.012	0.188881
1787	14.018	0.197375
1788	14.024	0.183956
1789	14.03	0.182195
1790	14.036	0.174655
1791	14.042	0.182908
1792	14.048	0.178559
1793	14.054	0.173266
1794	14.06	0.172281
1795	14.066	0.174749
1796	14.072	0.170877
1797	14.078	0.163096
1798	14.084	0.168294
1799	14.09	0.170845
1800	14.095	0.173911
1801	14.101	0.162614
1802	14.107	0.178695
1803	14.113	0.168493
1804	14.119	0.174692
1805	14.125	0.177437
1806	14.131	0.175388
1807	14.137	0.159669
1808	14.143	0.17072
1809	14.149	0.173885
1810	14.155	0.178134
1811	14.161	0.166208
1812	14.167	0.170903
1813	14.173	0.16876
1814	14.179	0.173764
1815	14.185	0.169111
1816	14.191	0.164196
1817	14.197	0.169441
1818	14.203	0.172218
1819	14.208	0.172947
1820	14.214	0.16876
1821	14.22	0.174057
1822	14.226	0.176562
1823	14.232	0.168304
1824	14.238	0.17028
1825	14.244	0.175802
1826	14.25	0.175064
1827	14.256	0.172622
1828	14.262	0.172926
1829	14.268	0.174733
1830	14.274	0.176326
1831	14.28	0.175095
1832	14.286	0.175467
1833	14.292	0.167785
1834	14.298	0.169001
1835	14.304	0.174299
1836	14.31	0.174608
1837	14.315	0.174592
1838	14.321	0.176185
1839	14.327	0.17019
1840	14.333	0.173523
1841	14.339	0.174073
1842	14.345	0.174131
1843	14.351	0.179465
1844	14.357	0.16624
1845	14.363	0.167461
1846	14.369	0.18055
1847	14.375	0.175734
1848	14.381	0.174042
1849	14.387	0.182913
1850	14.393	0.167518
1851	14.399	0.176525
1852	14.405	0.179266
1853	14.411	0.181493
1854	14.417	0.179334
1855	14.423	0.184149
1856	14.428	0.18307
1857	14.434	0.177479
1858	14.44	0.183353
1859	14.446	0.173282
1860	14.452	0.194027
1861	14.458	0.178506
1862	14.464	0.177987
1863	14.47	0.184873
1864	14.476	0.188855
1865	14.482	0.18832
1866	14.488	0.181299
1867	14.494	0.17061
1868	14.5	0.192596
1869	14.506	0.184375
1870	14.512	0.175378
1871	14.518	0.18329
1872	14.524	0.181357
1873	14.53	0.188446
1874	14.535	0.17903
1875	14.541	0.176761
1876	14.547	0.167686
1877	14.553	0.177699
1878	14.559	0.16832
1879	14.565	0.170657
1880	14.571	0.177998
1881	14.577	0.169918
1882	14.583	0.158348
1883	14.589	0.174969
1884	14.595	0.171768
1885	14.601	0.16122
1886	14.607	0.171799
1887	14.613	0.176777
1888	14.619	0.16865
1889	14.625	0.181168
1890	14.631	0.171469
1891	14.637	0.176358
1892	14.643	0.168304
1893	14.648	0.171548
1894	14.654	0.166219
1895	14.66	0.170699
1896	14.666	0.179664
1897	14.672	0.173099
1898	14.678	0.171265
1899	14.684	0.168833
1900	14.69	0.16723
1901	14.696	0.174021
1902	14.702	0.164951
1903	14.708	0.166418
1904	14.714	0.171736
1905	14.72	0.168639
1906	14.726	0.175058
1907	14.732	0.174257
1908	14.738	0.177998
1909	14.744	0.172548
1910	14.75	0.169394
1911	14.755	0.174629
1912	14.761	0.175252
1913	14.767	0.173989
1914	14.773	0.16766
1915	14.779	0.167005
1916	14.785	0.158348
1917	14.791	0.176028
1918	14.797	0.172826
1919	14.803	0.169708
1920	14.809	0.173596
1921	14.815	0.182976
1922	14.821	0.178496
1923	14.827	0.167502
1924	14.833	0.18013
1925	14.839	0.176709
1926	14.845	0.173046
1927	14.851	0.17837
1928	14.857	0.162771
1929	14.863	0.172124
1930	14.868	0.17641
1931	14.874	0.174896
1932	14.88	0.169153
1933	14.886	0.16668
1934	14.892	0.175394
1935	14.898	0.16167
1936	14.904	0.172512
1937	14.91	0.168964
1938	14.916	0.176594
1939	14.922	0.178349
1940	14.928	0.16428
1941	14.934	0.169069
1942	14.94	0.171595
1943	14.946	0.178113
1944	14.952	0.1739
1945	14.958	0.170908
1946	14.964	0.176981
1947	14.97	0.173591
1948	14.975	0.188132
1949	14.981	0.177133
1950	14.987	0.175635
1951	14.993	0.178234
1952	14.999	0.177448
1953	15.005	0.177217
1954	15.011	0.172648
1955	15.017	0.171532
1956	15.023	0.163331
1957	15.029	0.172423
1958	15.035	0.167686
1959	15.041	0.175111
1960	15.047	0.173287
1961	15.053	0.17629
1962	15.059	0.177254
1963	15.065	0.170526
1964	15.071	0.174414
1965	15.077	0.172868
1966	15.083	0.181309
1967	15.088	0.188305
1968	15.094	0.17838
1969	15.1	0.173733
1970	15.106	0.167754
1971	15.112	0.166381
1972	15.118	0.172433
1973	15.124	0.176237
1974	15.13	0.173916
1975	15.136	0.168865
1976	15.142	0.172412
1977	15.148	0.181556
1978	15.154	0.179868
1979	15.16	0.168917
1980	15.166	0.180513
1981	15.172	0.183018
1982	15.178	0.182074
1983	15.184	0.178726
1984	15.19	0.175787
1985	15.195	0.171579
1986	15.201	0.180309
1987	15.207	0.178207
1988	15.213	0.172962
1989	15.219	0.179276
1990	15.225	0.167775
1991	15.231	0.173067
1992	15.237	0.17444
1993	15.243	0.181985
1994	15.249	0.182216
1995	15.255	0.170164
1996	15.261	0.175388
1997	15.267	0.180382
[truncated: 206 more rows]
