# Supplementary material for: Engineering Escherichia coli for the production of butyl octanoate from endogenous octanoyl-CoA
Source: PeerJ. 2019 Jul 1;7:e6971. doi: 10.7717/peerj.6971 (PMC6610577; doi:10.7717/peerj.6971)
Supplement: Supplemental Information 9 [file peerj-07-6971-s009.xlsx]

## Sheet: Sheet1
	S	S	S	P	P	P
	1	2	3	1	2	3				BH	BB
Butyl Butyrate	254590	218204	204488	323152	276904	251057			SLOPE	4895	2305
Butyl Hexanoate	43413	41446	30572	192307	178950	219376			Y-INT	-7429	40091
	S	S	S	P	P	P
	1	2	3	1	2	3
Butyl Butyrate	93.0581	77.2725	71.3219	122.803	102.739	91.5254
Butyl Hexanoate	10.3865	9.98468	7.76323	40.8041	38.0754	46.334
	S	P			S	P
Butyl Butyrate	80.5508	105.689		Butyl Butyrate	11.2328	15.8462
Butyl Hexanoate	9.37814	41.7378		Butyl Hexanoate	1.41291	4.20775
	Culture Broth	Cell pellet				S	P
Butyl Butyrate	4.85246	2.11378	6.96624		Butyl Butyrate	0.676677	0.316923
Butyl Hexanoate	0.564948	0.834757	1.3997		Butyl Hexanoate	0.0851153	0.084155
