# Supplementary material for: Engineering Escherichia coli for the production of butyl octanoate from endogenous octanoyl-CoA
Source: PeerJ. 2019 Jul 1;7:e6971. doi: 10.7717/peerj.6971 (PMC6610577; doi:10.7717/peerj.6971)
Supplement: Supplemental Information 10 [file peerj-07-6971-s010.xlsx]

## Sheet: Sheet1
area	WT	WT	WT	FAT C43	FAT C43	FAT C43	FAT C43 cer	FAT C43 cer	FAT C43 cer	fadE	fadE	fadE	FAT fadE	FAT fadE	FAT fadE	FAT fadE cer	FAT fadE cer	FAT fadE cer
	1	2	3	1	2	3	1	2	3	1	2	3	1	2	3	1	2	3
C8	36330	37393	39144	85399	94036	69535	167825	124356	144356	37319	40425	39514	173026	175327	215808	352581	377129	366559
C11 (intstnd)	1013247	1056648	1105678	936694	1238917	1158632	1176930	450114	1078818	1214021	1213664	1295228	1440129	1299935	2044137	976135	1420901	1239388
OD	3.16	3.14	3.32	5.44	4.48	5.74	5.04	5.62	5.42	8.32	8.36	8.42	7.9	8.12	8.08	7.24	7.32	7.44
ug/OD600	WT	WT	WT	FAT C43	FAT C43	FAT C43	FAT C43 cer	FAT C43 cer	FAT C43 cer	fadE	fadE	fadE	FAT fadE	FAT fadE	FAT fadE	FAT fadE cer	FAT fadE cer	FAT fadE cer
	1	2	3	1	2	3	1	2	3	1	2	3	1	2	3	1	2	3
C8	0.113465	0.116785	0.122254	0.266717	0.293692	0.217171	0.524148	0.388387	0.45085	0.116554	0.126255	0.123409	0.540392	0.547579	0.674008	1.10118	1.17784	1.14483
average	C43	FATB1 in C43	FATB1 in C43 + cerulenin	ΔfadE	FATB1 in ΔfadE	FATB1 in ΔfadE + cerulenin				stndev	C43	FATB1 C43	FATB1 C43 cerulenin	fadE	FATB1 fadE	FATB2 fadE cerulenin
C8	0.117501	0.259193	0.454462	0.122073	0.587326	1.14128				C8	0.00443788	0.0388114	0.0679529	0.00498654	0.0751547	0.0384569
relative abundance	C43	S002	DLBO2	DLBO2 + cerulenin						relative abundance	C43	S002	DLBO2	DLBO2 + cerulenin
C8	1	1.0389	4.99846	9.71293						C8	0.0377687	0.0424381	0.639606	0.327289
