# Supplementary material for: Engineering Escherichia coli for the production of butyl octanoate from endogenous octanoyl-CoA
Source: PeerJ. 2019 Jul 1;7:e6971. doi: 10.7717/peerj.6971 (PMC6610577; doi:10.7717/peerj.6971)
Supplement: Supplemental Information 11 [file peerj-07-6971-s011.xlsx]

## Sheet: raw data
Well / Set	Dye	Content	Description	Efficiency	C(t)	Quantity	Avg C(t)	Max C(t)	Min C(t)	C(t) SD	Avg Quantity	Max Quantity	Min Quantity	Quantity SD	Wellset Type
B2	SBG1	Sample	Ter1 50ng	0.699	30.33
C2	SBG1	Sample	Ter1 50ng	0.7112	30.47
D2	SBG1	Sample	Ter1 50ng	0.7188	31.07
E2	SBG1	Sample		0.7657	27.33
F2	SBG1	Sample		0.7347	27.23
G2	SBG1	Sample		0.6996	26.99
B3	SBG1	Sample		0.7054	30.34
C3	SBG1	Sample		0.5512	29.94
D3	SBG1	Sample		0.6313	30.78
E3	SBG1	Sample		0.708	27.21
F3	SBG1	Sample		0.7677	26.97
G3	SBG1	Sample		0.7582	27.22
B4	SBG1	Sample		0.7204	30.61
C4	SBG1	Sample		0.7687	30.35
D4	SBG1	Sample		0.6009	30.61
E4	SBG1	Sample		0.6506	29.16
F4	SBG1	Sample		0.7437	29.53
G4	SBG1	Sample		0.6513	28.98
B5	SBG1	Sample		0.8517	27.65
C5	SBG1	Sample		0.8023	27.55
D5	SBG1	Sample		0.7863	27.23
E5	SBG1	Sample		0.7368	25.48
F5	SBG1	Sample		0.8338	25.76
G5	SBG1	Sample		0.8078	25.5
B6	SBG1	Sample		0.8081	27.61
C6	SBG1	Sample		0.7728	27.44
D6	SBG1	Sample		0.7934	27.28
E6	SBG1	Sample		0.9197	25.79
F6	SBG1	Sample		0.8019	25.25
G6	SBG1	Sample		0.8048	25.26
B7	SBG1	Sample		0.7556	27.1
C7	SBG1	Sample		0.7974	27.17
D7	SBG1	Sample		0.7576	27.38
E7	SBG1	Sample		0.7908	26.69
F7	SBG1	Sample		0.7913	26.84
G7	SBG1	Sample		0.78	27.31
B8	SBG1	Sample		0.8058	20.43
C8	SBG1	Sample		0.7892	20.45
D8	SBG1	Sample		0.8642	20.62
E8	SBG1	Sample		0.9203	16.49
F8	SBG1	Sample		0.8584	16.46
G8	SBG1	Sample		0.8956	16.43
B9	SBG1	Sample		0.8002	19.12
C9	SBG1	Sample		0.8184	19.09
D9	SBG1	Sample		0.7504	19
E9	SBG1	Sample		0.8472	15.93
F9	SBG1	Sample		1.017	15.91
G9	SBG1	Sample		0.8965	15.99
B10	SBG1	Sample		0.8457	16.96
C10	SBG1	Sample		0.8559	16.86
D10	SBG1	Sample		0.868	16.92
E10	SBG1	Sample		0.8207	18.1
F10	SBG1	Sample		0.7989	18.1
G10	SBG1	Sample		0.9075	17.98
B11	SBG1	Sample		0.8254	30.92
C11	SBG1	Sample		0.7611	30.5
D11	SBG1	Sample		0.8378	27.38
E11	SBG1	Sample		0.8121	27.37
F11	SBG1	Sample		0.8284	17.7
G11	SBG1	Sample		0.8019	17.61
C12	SBG1	Sample		0.7813	30.31
E12	SBG1	Sample		0.8745	27.7
G12	SBG1	Sample		0.8287	25.16

## Sheet: Vic for TER AAT RRSA induced
induced
strain	ct rrsA			avg ct rrsA	delta ct target	E(rrsA) ^delta ct		ct AAT			avg ct AAT	delta ct target	E(aat) ^delta ct		ct Ter			avg ct ter	delta ct target	E(TER) ^delta ct
pBEST04-1	16.49	16.46	16.43	16.46	8.7	399.871		25.48	25.76	25.5	25.49	2.21	4.55396		27.33	27.23	26.99	27.1833	3.12667	8.71095
pBEST04-1	16.17	15.98	15.99	16.0467	9.11333	531.54		25.79	25.25	25.26	25.255	2.445	5.35056		27.11	26.97	27.02	27.0333	3.27667	9.66418
pBEST04-1	18.01	18.1	17.98	18.03	7.13	135.637		26.69	26.84	27.31	26.765	0.935	1.89911		29.06	29.53	28.98	29.02	1.29	2.4426
wt		17.7	17.61	17.655	7.505	175.602			27.38	27.37	27.375	0.325	1.24975			30.92	30.5	30.71	-0.4	0.758116
BLANK			25.16							27.7							30.31
							FOLD CHANGE	fold change/wt fold change	avg	stndev		FOLD CHANGE	fold change/wt fold change	avg	stndev
						pBEST04 AAT -1	0.0113886	1.60021	1.66065	0.281383	pBEST04 TER -1	0.0217844	5.04591	4.47618	0.493809
						pBEST04 AAT -2	0.0100661	1.41439			pBEST04 TER -2	0.0181815	4.21136
						pBEST04 AAT -3	0.0140014	1.96734			pBEST04 TER -3	0.0180084	4.17127
						WT AAT	0.00711692				WT TER	0.00431724
										AAT	Ter
										1.66065	4.47618
										0.281383	0.493809

## Sheet: Vic for TER AAT RRSA uninduced
induced
strain	ct rrsA			avg ct rrsA	delta ct target	E(rrsA) ^delta ct		ct AAT			avg ct AAT	delta ct target	E(aat) ^delta ct		ct Ter			avg ct ter	delta ct target	E(TER) ^delta ct
pBEST04-1	20.43	20.45	20.62	20.5	4.66	24.7555		27.65	27.55	27.23	27.6	0.1	1.071		30.33	30.47	31.07	30.4	-0.09	0.939595
pBEST04-1	19.12	19.09	19	19.07	6.09	66.2741		27.61	27.44	27.28	27.4433	0.256667	1.19252		30.34	29.94	30.78	30.56	-0.25	0.841075
pBEST04-1	16.96	16.86	16.92	16.9133	8.24667	292.645		27.1	27.17	27.38	27.2167	0.483333	1.39313		30.61	30.35	30.61	30.5233	-0.213333	0.862699
wt		17.7	17.61	17.655	7.505	175.602			27.38	27.37	27.375	0.325	1.24975			30.92	30.5	30.71	-0.4	0.758116
BLANK			25.16							27.7							30.31
							FOLD CHANGE	fold change/wt fold change	avg	stndev		FOLD CHANGE	fold change/wt fold change	avg	stndev
						pBEST04 AAT -1	0.0432633	6.07893			pBEST04 TER -1	0.037955	8.79149
						pBEST04 AAT -2	0.0179937	2.5283			pBEST04 TER -2	0.0126909	2.93958
						pBEST04 AAT -3	0.00476048	0.668896			pBEST04 TER -3	0.00294794	0.682829
						WT AAT	0.00711692				WT TER	0.00431724
