# Supplementary material for: Engineering Escherichia coli for the production of butyl octanoate from endogenous octanoyl-CoA
Source: PeerJ. 2019 Jul 1;7:e6971. doi: 10.7717/peerj.6971 (PMC6610577; doi:10.7717/peerj.6971)
Supplement: Supplemental Information 12 [file peerj-07-6971-s012.xlsx]

## Sheet: Raw Data. MC_bbbhbo standards t
#"+ TIC Scan MC_bbbhbo.D "
#Point
0	3.393	0.00996096
1	3.399	0.0130472
2	3.405	0.0165946
3	3.411	0.0160654
4	3.417	0.013283
5	3.423	0.0105007
6	3.429	0.0065341
7	3.435	0.00713668
8	3.44	0.00498834
9	3.446	0.00727292
10	3.452	0.00502502
11	3.458	0.00820561
12	3.464	0.0086248
13	3.47	0.00689041
14	3.476	0.00413949
15	3.482	0.00679085
16	3.488	0.0064293
17	3.494	0.00642406
18	3.5	0.00901255
19	3.506	0.00584244
20	3.512	0.00379365
21	3.518	0.00771307
22	3.524	0.00561712
23	3.53	0.00568
24	3.536	0.0050617
25	3.542	0.00745631
26	3.547	0.00817941
27	3.553	0.00467395
28	3.559	0.00465299
29	3.565	0.00831565
30	3.571	0.00754539
31	3.577	0.00694805
32	3.583	0.00788074
33	3.589	0.00508266
34	3.595	0.0034583
35	3.601	0.00607299
36	3.607	0.00665462
37	3.613	0.00379889
38	3.619	0.00642406
39	3.625	0.00421808
40	3.631	0.0065341
41	3.637	0.00663366
42	3.643	0.00488354
43	3.649	0.00333255
44	3.655	0.0050879
45	3.66	0.00637166
46	3.666	0.00967277
47	3.672	0.00662842
48	3.678	0.00733056
49	3.684	0.00471587
50	3.69	0.00849904
51	3.696	0.00710524
52	3.702	0.00721004
53	3.708	0.00539181
54	3.714	0.00878724
55	3.72	0.00402421
56	3.726	0.0056538
57	3.732	0.00315963
58	3.738	0.00590008
59	3.744	0.00564856
60	3.75	0.00490974
61	3.756	0.0036155
62	3.762	0.00815321
63	3.767	0.00457439
64	3.773	0.00737771
65	3.779	0.0111556
66	3.785	0.00623019
67	3.791	0.0080065
68	3.797	0.00822133
69	3.803	0.00495166
70	3.809	0.00427572
71	3.815	0.00343734
72	3.821	0.0023265
73	3.827	0.00255181
74	3.833	0.00115801
75	3.839	0.00530797
76	3.845	0.00542325
77	3.851	0.00815845
78	3.857	0.00263565
79	3.863	0.00579528
80	3.869	0.00413949
81	3.875	0.00626163
82	3.88	0.00659174
83	3.886	0.00348974
84	3.892	0.00378841
85	3.898	0.00388273
86	3.904	0.00624067
87	3.91	0.00439624
88	3.916	0.0028924
89	3.922	0.00330635
90	3.928	0.00909115
91	3.934	0.0121774
92	3.94	0.0234169
93	3.946	0.0493227
94	3.952	0.0898949
95	3.958	0.11906
96	3.964	0.189379
97	3.97	0.359831
98	3.976	0.464586
99	3.982	0.37793
100	3.987	0.197343
101	3.993	0.0921586
102	3.999	0.0487621
103	4.005	0.0271686
104	4.011	0.023113
105	4.017	0.018874
106	4.023	0.0165265
107	4.029	0.0135817
108	4.035	0.0156148
109	4.041	0.019487
110	4.047	0.025036
111	4.053	0.0235374
112	4.059	0.0194241
113	4.065	0.0116796
114	4.071	0.00803794
115	4.077	0.00761351
116	4.083	0.00759255
117	4.089	0.00936362
118	4.095	0.00654458
119	4.1	0.0078755
120	4.106	0.00824753
121	4.112	0.00839949
122	4.118	0.00866148
123	4.124	0.00527129
124	4.13	0.00902303
125	4.136	0.00781786
126	4.142	0.00751919
127	4.148	0.00833661
128	4.154	0.00442244
129	4.16	0.00321203
130	4.166	0.0101758
131	4.172	0.0120883
132	4.178	0.00868244
133	4.184	0.00653934
134	4.19	0.00636118
135	4.196	0.00335351
136	4.202	0.00161388
137	4.207	0.00689565
138	4.213	0.00416044
139	4.219	0.00344258
140	4.225	0.00398753
141	4.231	0.00597867
142	4.237	0.00352118
143	4.243	0.00438576
144	4.249	0.00842045
145	4.255	0.00797506
146	4.261	0.00833137
147	4.267	0.0177212
148	4.273	0.0273625
149	4.279	0.0226729
150	4.285	0.0156724
151	4.291	0.0141948
152	4.297	0.00941602
153	4.303	0.00523461
154	4.309	0.0056538
155	4.315	0.0035631
156	4.32	0.00662842
157	4.326	0.00468443
158	4.332	0.0063769
159	4.338	0.00679609
160	4.344	0.00513506
161	4.35	0.00507742
162	4.356	0.00275616
163	4.362	0.00732008
164	4.368	0.00570096
165	4.374	0.00654458
166	4.38	0.00397705
167	4.386	0.00596819
168	4.392	0.00732008
169	4.398	0.00549661
170	4.404	0.00609919
171	4.41	0.00483115
172	4.416	0.00566952
173	4.422	0.00605203
174	4.428	0.00459011
175	4.433	0.00475779
176	4.439	0.00614111
177	4.445	0.00642406
178	4.451	0.00253085
179	4.457	0.00370982
180	4.463	0.00387749
181	4.469	0.00801698
182	4.475	0.0058372
183	4.481	0.00358406
184	4.487	0.00634546
185	4.493	0.0057586
186	4.499	0.00246273
187	4.505	0.00732008
188	4.511	0.00538657
189	4.517	0.00501978
190	4.523	0.00510362
191	4.529	0.00464775
192	4.535	0.00310199
193	4.54	0.00811653
194	4.546	0.00459535
195	4.552	0.00395609
196	4.558	0.0094265
197	4.564	0.011732
198	4.57	0.00716812
199	4.576	0.00809034
200	4.582	0.00585292
201	4.588	0.00718908
202	4.594	0.00356834
203	4.6	0.0037203
204	4.606	0.00373602
205	4.612	0.00674369
206	4.618	0.00830517
207	4.624	0.00553329
208	4.63	0.0072048
209	4.636	0.00520842
210	4.642	0.00416568
211	4.648	0.00187587
212	4.653	0.00481543
213	4.659	0.00667034
214	4.665	0.00442768
215	4.671	0.00618827
216	4.677	0.00564856
217	4.683	0.00787026
218	4.689	0.00925358
219	4.695	0.0115329
220	4.701	0.0172182
221	4.707	0.0172863
222	4.713	0.0102492
223	4.719	0.00681705
224	4.725	0.0065341
225	4.731	0.00313343
226	4.737	0.00593676
227	4.743	0.00968849
228	4.749	0.0118368
229	4.755	0.00523461
230	4.76	0.00440672
231	4.766	0.0050093
232	4.772	0.00553853
233	4.778	0.00509838
234	4.784	0.0065603
235	4.79	0.00284
236	4.796	0.00150384
237	4.802	0.00638214
238	4.808	0.00423904
239	4.814	0.00337971
240	4.82	0.00342163
241	4.826	0.00618827
242	4.832	0.00811129
243	4.838	0.0103644
244	4.844	0.00978281
245	4.85	0.00760303
246	4.856	0.0050879
247	4.862	0.00325395
248	4.868	0.00520317
249	4.873	0.00612539
250	4.879	0.00362074
251	4.885	0.00381985
252	4.891	0.00454295
253	4.897	0.00303388
254	4.903	0.00173439
255	4.909	0.00370982
256	4.915	0.00396133
257	4.921	0
258	4.927	0.00140952
259	4.933	0.00145144
260	4.939	0.00535513
261	4.945	0.00284
262	4.951	0.00144096
263	4.957	0.00262517
264	4.963	0.00173963
265	4.969	0.00564856
266	4.975	0.00339019
267	4.98	0.00341114
268	4.986	0.0029186
269	4.992	0.00125233
270	4.998	0.000429668
271	5.004	0.00451151
272	5.01	0.0034321
273	5.016	0.00296576
274	5.022	0.00190731
275	5.028	0.00520842
276	5.034	0.00272996
277	5.04	0.00477351
278	5.046	0.00260945
279	5.052	0.00464775
280	5.058	0.00462155
281	5.064	0.00282952
282	5.07	0.00781262
283	5.076	0.00789646
284	5.082	0.0132621
285	5.088	0.0109303
286	5.093	0.00681705
287	5.099	0.0070476
288	5.105	0.00669653
289	5.111	0.00442768
290	5.117	0.00437004
291	5.123	0.00282952
292	5.129	0.00371506
293	5.135	0.0013414
294	5.141	0.00370982
295	5.147	0.00718908
296	5.153	0.00577956
297	5.159	0.00686945
298	5.165	0.00641358
299	5.171	0.00461107
300	5.177	0.0021169
301	5.183	0.00279284
302	5.189	0.00423904
303	5.195	0.00312819
304	5.2	0.00443816
305	5.206	0.00449056
306	5.212	0.000785978
307	5.218	0.00389321
308	5.224	0.001289
309	5.23	0.00244177
310	5.236	0.00536561
311	5.242	0.00180775
312	5.248	0.0020121
313	5.254	0.00878724
314	5.26	0.00965181
315	5.266	0.0151903
316	5.272	0.0145878
317	5.278	0.0671697
318	5.284	0.625822
319	5.29	3.24939
320	5.296	9.27927
321	5.302	13.8574
322	5.308	9.57304
323	5.313	2.32338
324	5.319	0.265346
325	5.325	0.0623647
326	5.331	0.0372396
327	5.337	0.0289659
328	5.343	0.020404
329	5.349	0.0192407
330	5.355	0.0176478
331	5.361	0.0142891
332	5.367	0.00902303
333	5.373	0.0127433
334	5.379	0.0137965
335	5.385	0.00743535
336	5.391	0.00949986
337	5.397	0.00486258
338	5.403	0.0092431
339	5.409	0.00753491
340	5.415	0.0102858
341	5.42	0.010595
342	5.426	0.00793314
343	5.432	0.00871912
344	5.438	0.00866148
345	5.444	0.00826325
346	5.45	0.00381985
347	5.456	0.00490974
348	5.462	0.00773927
349	5.468	0.00615159
350	5.474	0.00552805
351	5.48	0.00378318
352	5.486	0.00722576
353	5.492	0.00465823
354	5.498	0.00611491
355	5.504	0.00638738
356	5.51	0.00602059
357	5.516	0.00315963
358	5.522	0.00479447
359	5.528	0.00337971
360	5.533	0.00317011
361	5.539	0.00432288
362	5.545	0.00462679
363	5.551	0.00483639
364	5.557	0.00252037
365	5.563	0.00335351
366	5.569	0.00505646
367	5.575	0.00298672
368	5.581	0.00381985
369	5.587	0.00347402
370	5.593	0.00412376
371	5.599	0.00190207
372	5.605	0.00530797
373	5.611	0.0065341
374	5.617	0.00618827
375	5.623	0.002971
376	5.629	0.00625115
377	5.635	0.00579004
378	5.64	0.0036941
379	5.646	0.00598915
380	5.652	0.00212214
381	5.658	0.00442768
382	5.664	0.000911735
383	5.67	0.00554377
384	5.676	0.00326967
385	5.682	0.00402945
386	5.688	0.00219026
387	5.694	0.00448532
388	5.7	0.00237365
389	5.706	0.00174487
390	5.712	0.00366266
391	5.718	0.00639262
392	5.724	0.00295528
393	5.73	0.00335351
394	5.736	0.00304959
395	5.742	0.00246273
396	5.748	0.00140428
397	5.753	0.00523461
398	5.759	0.00419188
399	5.765	0.00457963
400	5.771	0.00244701
401	5.777	0.00100081
402	5.783	0.00259373
403	5.789	0.00667557
404	5.795	0.0021693
405	5.801	0.00585292
406	5.807	6.81e-05
407	5.813	0.00282952
408	5.819	0.00260421
409	5.825	0.00204878
410	5.831	0.00448008
411	5.837	0.00474207
412	5.843	0.00354214
413	5.849	0.00289764
414	5.855	0.00101129
415	5.86	0.00330111
416	5.866	0.00313867
417	5.872	0.00437528
418	5.878	0.00542849
419	5.884	0.00172915
420	5.89	0.00447484
421	5.896	0.000220074
422	5.902	0.00365742
423	5.908	0.00548613
424	5.914	0.00249417
425	5.92	0.00544421
426	5.926	0.00454295
427	5.932	0.00410281
428	5.938	0.00400849
429	5.944	0.00452199
430	5.95	0.00529749
431	5.956	0.00208546
432	5.962	0.00768163
433	5.968	0.00416568
434	5.973	0.00630878
435	5.979	0.00330111
436	5.985	0.00467919
437	5.991	0.00499882
438	5.997	0.00504598
439	6.003	0.00552281
440	6.009	0.00627211
441	6.015	0.0042862
442	6.021	0.0072572
443	6.027	0.00580052
444	6.033	0.00598915
445	6.039	0.00407661
446	6.045	0.00521366
447	6.051	0.0044696
448	6.057	0.0085986
449	6.063	0.00837853
450	6.069	0.00766067
451	6.075	0.00363122
452	6.08	0.00282428
453	6.086	0.00744059
454	6.092	0.00553853
455	6.098	0.00549661
456	6.104	0.0021693
457	6.11	0.00155624
458	6.116	0.00168723
459	6.122	0.00435956
460	6.128	0.00346354
461	6.134	0.00314915
462	6.14	0.00233174
463	6.146	0.00346354
464	6.152	0.00326967
465	6.158	0.00479971
466	6.164	0.00474731
467	6.17	0.00459011
468	6.176	0.000492546
469	6.182	0.0042862
470	6.188	0.00383557
471	6.193	0.00505122
472	6.199	0.000822657
473	6.205	0.00107417
474	6.211	0.00315963
475	6.217	0.00194399
476	6.223	0.00357882
477	6.229	0.00511934
478	6.235	0.00543373
479	6.241	0.00402945
480	6.247	0.00571668
481	6.253	0.00475779
482	6.259	0.0041552
483	6.265	0.00437528
484	6.271	0.00312295
485	6.277	0.00715764
486	6.283	0.0112552
487	6.289	0.0107574
488	6.295	0.00627211
489	6.3	0.00310199
490	6.306	0.00402945
491	6.312	0.00370982
492	6.318	0.010202
493	6.324	0.00534989
494	6.33	0.00589484
495	6.336	0.00205926
496	6.342	0.00326443
497	6.348	0.00198066
498	6.354	0.00725196
499	6.36	0.00488354
500	6.366	0.00204354
501	6.372	0.0020907
502	6.378	0.00405565
503	6.384	0.00200162
504	6.39	0.00239461
505	6.396	0.00184443
506	6.402	0.00617255
507	6.408	0.00332731
508	6.413	0.00364694
509	6.419	0.00584768
510	6.425	0.00404517
511	6.431	0.00649742
512	6.437	0.00629306
513	6.443	0.00458487
514	6.449	0.00327491
515	6.455	0.00412376
516	6.461	0.0027614
517	6.467	0.00213262
518	6.473	0.000864576
519	6.479	0.00353166
520	6.485	0.00532893
521	6.491	0.00396133
522	6.497	0.000230554
523	6.503	0.0022479
524	6.509	0.00413949
525	6.515	0.00507218
526	6.52	0.000576384
527	6.526	0.00399801
528	6.532	0.0042338
529	6.538	0.00549137
530	6.544	0.00337971
531	6.55	0.00554377
532	6.556	0.00356834
533	6.562	0.00457439
534	6.568	0.00201734
535	6.574	0.00465823
536	6.58	0.00171343
537	6.586	0.00259897
538	6.592	0.00340067
539	6.598	0.00488354
540	6.604	0.00744583
541	6.61	0.0035369
542	6.616	0.00272996
543	6.622	0.0048783
544	6.628	0.00772355
545	6.633	0.00543897
546	6.639	0.00446436
547	6.645	0.0044172
548	6.651	0.00537085
549	6.657	0.00401373
550	6.663	0.00450103
551	6.669	0.00236841
552	6.675	0.00390369
553	6.681	0.00485734
554	6.687	0.00840997
555	6.693	0.0783096
556	6.699	0.721214
557	6.705	3.44553
558	6.711	9.07464
559	6.717	12.1219
560	6.723	6.61113
561	6.729	1.13892
562	6.735	0.111892
563	6.74	0.0292803
564	6.746	0.0213734
565	6.752	0.0168776
566	6.758	0.00977757
567	6.764	0.0138385
568	6.77	0.0115277
569	6.776	0.0102072
570	6.782	0.00775498
571	6.788	0.00816893
572	6.794	0.00757159
573	6.8	0.00609919
574	6.806	0.00546517
575	6.812	0.00745631
576	6.818	0.00460059
577	6.824	0.00605727
578	6.83	0.00619875
579	6.836	0.0111295
580	6.842	0.00713668
581	6.848	0.00999764
582	6.853	0.0106369
583	6.859	0.0121093
584	6.865	0.00840473
585	6.871	0.00660222
586	6.877	0.00417092
587	6.883	0.00456915
588	6.889	0.00913831
589	6.895	0.00684849
590	6.901	0.00318583
591	6.907	0.00457439
592	6.913	0.00599963
593	6.919	0.00461107
594	6.925	0.00661794
595	6.931	0.00671749
596	6.937	0.0065341
597	6.943	0.00365218
598	6.949	0.000859336
599	6.955	0.00605203
600	6.96	0.00541801
601	6.966	0.00544945
602	6.972	0.00625639
603	6.978	0.00656554
604	6.984	0.0109356
605	6.99	0.00729912
606	6.996	0.0123975
607	7.002	0.0141371
608	7.008	0.0127433
609	7.014	0.00922214
610	7.02	0.00729912
611	7.026	0.00805366
612	7.032	0.00709476
613	7.038	0.00577432
614	7.044	0.00477875
615	7.05	0.00620923
616	7.056	0.00507742
617	7.062	0.00682229
618	7.068	0.0052189
619	7.073	0.00586864
620	7.079	0.00511934
621	7.085	0.00377269
622	7.091	0.00745107
623	7.097	0.00472635
624	7.103	0.00698473
625	7.109	0.00682753
626	7.115	0.00660222
627	7.121	0.00608347
628	7.127	0.00530273
629	7.133	0.00636118
630	7.139	0.0100658
631	7.145	0.00661794
632	7.151	0.00361026
633	7.157	0.0099662
634	7.163	0.00924834
635	7.169	0.0177107
636	7.175	0.0159134
637	7.18	0.0124342
638	7.186	0.00793314
639	7.192	0.00772879
640	7.198	0.00676465
641	7.204	0.00663366
642	7.21	0.0085462
643	7.216	0.00760303
644	7.222	0.00816369
645	7.228	0.00613063
646	7.234	0.00668605
647	7.24	0.00620923
648	7.246	0.00831041
649	7.252	0.00651838
650	7.258	0.00915926
651	7.264	0.00657078
652	7.27	0.00714192
653	7.276	0.0106736
654	7.282	0.0058634
655	7.288	0.00290288
656	7.293	0.00730436
657	7.299	0.00486258
658	7.305	0.00237889
659	7.311	0.00640834
660	7.317	0.00722052
661	7.323	0.00553853
662	7.329	0.00703712
663	7.335	0.00341639
664	7.341	0.00625639
665	7.347	0.00330635
666	7.353	0.00614111
667	7.359	0.00648694
668	7.365	0.0125704
669	7.371	0.0143415
670	7.377	0.0142419
671	7.383	0.0117635
672	7.389	0.00723624
673	7.395	0.00789646
674	7.4	0.00523985
675	7.406	0.00759779
676	7.412	0.00779166
677	7.418	0.0078231
678	7.424	0.00671749
679	7.43	0.0080589
680	7.436	0.00891823
681	7.442	0.00905447
682	7.448	0.00975661
683	7.454	0.00678037
684	7.46	0.00729388
685	7.466	0.00742487
686	7.472	0.00744059
687	7.478	0.00496738
688	7.484	0.0071524
689	7.49	0.0072572
690	7.496	0.00955225
691	7.502	0.00837853
692	7.508	0.00765543
693	7.513	0.00760827
694	7.519	0.0079279
695	7.525	0.00743535
696	7.531	0.00538657
697	7.537	0.0057586
698	7.543	0.00573764
699	7.549	0.00853572
700	7.555	0.00838377
701	7.561	0.010836
702	7.567	0.00966229
703	7.573	0.00815321
704	7.579	0.0036679
705	7.585	0.00855668
706	7.591	0.00564856
707	7.597	0.00850952
708	7.603	0.00841521
709	7.609	0.00769211
710	7.615	0.00877152
711	7.62	0.0124656
712	7.626	0.0182242
713	7.632	0.0136131
714	7.638	0.00839949
715	7.644	0.00693757
716	7.65	0.00471063
717	7.656	0.00826325
718	7.662	0.00729912
719	7.668	0.00478923
720	7.674	0.00527653
721	7.68	0.0072834
722	7.686	0.00759779
723	7.692	0.00900731
724	7.698	0.00851476
725	7.704	0.00529225
726	7.71	0.0111504
727	7.716	0.00517174
728	7.722	0.00818989
729	7.728	0.00515602
730	7.733	0.00555425
731	7.739	0.0080065
732	7.745	0.0113443
733	7.751	0.00813225
734	7.757	0.00826325
735	7.763	0.0057586
736	7.769	0.00927454
737	7.775	0.00400849
738	7.781	0.00417092
739	7.787	0.00634022
740	7.793	0.00497786
741	7.799	0.00450103
742	7.805	0.00779166
743	7.811	0.00538657
744	7.817	0.00863004
745	7.823	0.00505122
746	7.829	0.0015248
747	7.835	0.00539705
748	7.84	0.00729388
749	7.846	0.00735152
750	7.852	0.00680657
751	7.858	0.00737247
752	7.864	0.00587912
753	7.87	0.00508266
754	7.876	0.00563808
755	7.882	0.00307579
756	7.888	0.0095051
757	7.894	0.00829993
758	7.9	0.00918547
759	7.906	0.00879248
760	7.912	0.00751395
761	7.918	0.00675941
762	7.924	0.00880819
763	7.93	0.00801698
764	7.936	0.00564856
765	7.942	0.0091645
766	7.948	0.00905447
767	7.953	0.0101077
768	7.959	0.0135136
769	7.965	0.0109041
770	7.971	0.00760303
771	7.977	0.00549661
772	7.983	0.00823181
773	7.989	0.00608871
774	7.995	0.0472058
775	8.001	0.391354
776	8.007	2.36497
777	8.013	7.59867
778	8.019	14.3193
779	8.025	13.0419
780	8.031	4.1674
781	8.037	0.438502
782	8.043	0.0528125
783	8.049	0.02687
784	8.055	0.0247688
785	8.06	0.0197752
786	8.066	0.0139799
787	8.072	0.0160182
788	8.078	0.0163379
789	8.084	0.0174802
790	8.09	0.0116954
791	8.096	0.0157458
792	8.102	0.0163064
793	8.108	0.0139328
794	8.114	0.0118997
795	8.12	0.0117897
796	8.126	0.0128586
797	8.132	0.0124342
798	8.138	0.0093217
799	8.144	0.0148759
800	8.15	0.00986141
801	8.156	0.0115067
802	8.162	0.0113757
803	8.168	0.0127486
804	8.173	0.0187534
805	8.179	0.015096
806	8.185	0.0146768
807	8.191	0.0130368
808	8.197	0.0118264
809	8.203	0.00920118
810	8.209	0.00959941
811	8.215	0.0086248
812	8.221	0.00821085
813	8.227	0.0110613
814	8.233	0.0104326
815	8.239	0.00759779
816	8.245	0.0063769
817	8.251	0.00925882
818	8.257	0.0111556
819	8.263	0.00784406
820	8.269	0.0110823
821	8.275	0.00940554
822	8.28	0.0114962
823	8.286	0.013194
824	8.292	0.0139171
825	8.298	0.0120412
826	8.304	0.0093479
827	8.31	0.00702664
828	8.316	0.00694805
829	8.322	0.0063507
830	8.328	0.00748251
831	8.334	0.00673845
832	8.34	0.00901779
833	8.346	0.00832089
834	8.352	0.011098
835	8.358	0.00713144
836	8.364	0.00956273
837	8.37	0.00928502
838	8.376	0.011512
839	8.382	0.0125233
840	8.388	0.00930598
841	8.393	0.0087296
842	8.399	0.00883439
843	8.405	0.0121512
844	8.411	0.0131206
845	8.417	0.0143048
846	8.423	0.0102544
847	8.429	0.00964133
848	8.435	0.0087296
849	8.441	0.00760827
850	8.447	0.00893919
851	8.453	0.0085986
852	8.459	0.00810605
853	8.465	0.00799602
854	8.471	0.00943698
855	8.477	0.00908067
856	8.483	0.0132778
857	8.489	0.0102806
858	8.495	0.00986141
859	8.5	0.0118159
860	8.506	0.00673321
861	8.512	0.0109461
862	8.518	0.00675941
863	8.524	0.0108465
864	8.53	0.011119
865	8.536	0.00707904
866	8.542	0.0101706
867	8.548	0.0106212
868	8.554	0.00778642
869	8.56	0.0108098
870	8.566	0.00698997
871	8.572	0.0130525
872	8.578	0.00943698
873	8.584	0.00871912
874	8.59	0.0102439
875	8.596	0.00743535
876	8.602	0.00774974
877	8.608	0.00791218
878	8.613	0.010967
879	8.619	0.0103225
880	8.625	0.0141266
881	8.631	0.0118368
882	8.637	0.0105426
883	8.643	0.0120831
884	8.649	0.0108203
885	8.655	0.0112762
886	8.661	0.00702664
887	8.667	0.0100291
888	8.673	0.00887107
889	8.679	0.00987189
890	8.685	0.0121145
891	8.691	0.0116534
892	8.697	0.0110089
893	8.703	0.0116534
894	8.709	0.00837853
895	8.715	0.0119888
896	8.72	0.0111085
897	8.726	0.014483
898	8.732	0.0102072
899	8.738	0.0133354
900	8.744	0.010705
901	8.75	0.0092169
902	8.756	0.0130368
903	8.762	0.014593
904	8.768	0.0112814
905	8.774	0.013283
906	8.78	0.0112238
907	8.786	0.0131573
908	8.792	0.0172444
909	8.798	0.0155938
910	8.804	0.0160968
911	8.81	0.0119783
912	8.816	0.0118106
913	8.822	0.0121879
914	8.828	0.0120464
915	8.833	0.0138804
916	8.839	0.0103906
917	8.845	0.00933218
918	8.851	0.0094265
919	8.857	0.0111609
920	8.863	0.00895491
921	8.869	0.011119
922	8.875	0.012911
923	8.881	0.014048
924	8.887	0.0117635
925	8.893	0.0173911
926	8.899	0.0111714
927	8.905	0.0127957
928	8.911	0.0085462
929	8.917	0.00894967
930	8.923	0.0103278
931	8.929	0.0117844
932	8.935	0.0130315
933	8.94	0.0113652
934	8.946	0.00894443
935	8.952	0.0120307
936	8.958	0.0113338
937	8.964	0.00968849
938	8.97	0.0124185
939	8.976	0.0108413
940	8.982	0.00859336
941	8.988	0.0136446
942	8.994	0.00888155
943	9	0.0115486
944	9.006	0.0117058
945	9.012	0.0152113
946	9.018	0.0154628
947	9.024	0.0143782
948	9.03	0.00968325
949	9.036	0.0109356
950	9.042	0.0118264
951	9.048	0.0119573
952	9.053	0.0124394
953	9.059	0.0145668
954	9.065	0.0118002
955	9.071	0.0121303
956	9.077	0.0115486
957	9.083	0.0139799
958	9.089	0.0132202
959	9.095	0.0160235
960	9.101	0.01267
961	9.107	0.013194
962	9.113	0.0122455
963	9.119	0.0140952
964	9.125	0.00987713
965	9.131	0.0133145
966	9.137	0.0129005
967	9.143	0.0121145
968	9.149	0.0139275
969	9.155	0.0134874
970	9.16	0.0120255
971	9.166	0.0147345
972	9.172	0.0106002
973	9.178	0.0125233
974	9.184	0.0123084
975	9.19	0.0105007
976	9.196	0.0148864
977	9.202	0.0143048
978	9.208	0.0114334
979	9.214	0.0150279
980	9.22	0.0138018
981	9.226	0.0123189
982	9.232	0.0149912
983	9.238	0.0114438
984	9.244	0.0124027
985	9.25	0.0101863
986	9.256	0.0142419
987	9.262	0.0150227
988	9.268	0.0131625
989	9.273	0.0153318
990	9.279	0.0161545
991	9.285	0.0162331
992	9.291	0.0140114
993	9.297	0.0147869
994	9.303	0.0125861
995	9.309	0.0149388
996	9.315	0.0182137
997	9.321	0.0147397
998	9.327	0.0157877
999	9.333	0.0152847
1000	9.339	0.0157615
1001	9.345	0.0164898
1002	9.351	0.0170924
1003	9.357	0.014483
1004	9.363	0.0121617
1005	9.369	0.0146244
1006	9.375	0.0123346
1007	9.38	0.0140533
1008	9.386	0.012146
1009	9.392	0.0110299
1010	9.398	0.0151432
1011	9.404	0.0186224
1012	9.41	0.0119835
1013	9.416	0.0157248
1014	9.422	0.0144044
1015	9.428	0.0179255
1016	9.434	0.017281
1017	9.44	0.0193193
1018	9.446	0.0156514
1019	9.452	0.0159868
1020	9.458	0.0181509
1021	9.464	0.0267495
1022	9.47	0.0381357
1023	9.476	0.0485158
1024	9.482	0.0383715
1025	9.488	0.0263145
1026	9.493	0.0190416
1027	9.499	0.0172391
1028	9.505	0.0175954
1029	9.511	0.0127695
1030	9.517	0.015096
1031	9.523	0.0134245
1032	9.529	0.0181037
1033	9.535	0.0173649
1034	9.541	0.0168304
1035	9.547	0.0177579
1036	9.553	0.0163955
1037	9.559	0.0164793
1038	9.565	0.0201106
1039	9.571	0.0191831
1040	9.577	0.0213681
1041	9.583	0.0184967
1042	9.589	0.0150174
1043	9.595	0.0187325
1044	9.6	0.0143467
1045	9.606	0.0148707
1046	9.612	0.0153999
1047	9.618	0.0178207
1048	9.624	0.0159187
1049	9.63	0.0177788
1050	9.636	0.0167518
1051	9.642	0.0200215
1052	9.648	0.0160654
1053	9.654	0.0187325
1054	9.66	0.0180408
1055	9.666	0.0199586
1056	9.672	0.0227567
1057	9.678	0.0175954
1058	9.684	0.0189473
1059	9.69	0.0165946
1060	9.696	0.0156881
1061	9.702	0.01846
1062	9.708	0.0194032
1063	9.713	0.017674
1064	9.719	0.0176478
1065	9.725	0.0206974
1066	9.731	0.0162331
1067	9.737	0.0198695
1068	9.743	0.017674
1069	9.749	0.0155204
1070	9.755	0.0167099
1071	9.761	0.0183028
1072	9.767	0.0197228
1073	9.773	0.0183133
1074	9.779	0.0198276
1075	9.785	0.0241872
1076	9.791	0.0225785
1077	9.797	0.0189054
1078	9.803	0.0213681
1079	9.809	0.0227462
1080	9.815	0.0221017
1081	9.82	0.019859
1082	9.826	0.0175692
1083	9.832	0.0192565
1084	9.838	0.0217978
1085	9.844	0.0208756
1086	9.85	0.0221489
1087	9.856	0.0199743
1088	9.862	0.0224895
1089	9.868	0.020294
1090	9.874	0.0181142
1091	9.88	0.0211585
1092	9.886	0.0199481
1093	9.892	0.0182347
1094	9.898	0.0211114
1095	9.904	0.0188478
1096	9.91	0.0208913
1097	9.916	0.0218974
1098	9.922	0.0210799
1099	9.928	0.0192669
1100	9.933	0.019508
1101	9.939	0.017302
1102	9.945	0.0208599
1103	9.951	0.0187796
1104	9.957	0.0206922
1105	9.963	0.0225052
1106	9.969	0.022589
1107	9.975	0.0238151
1108	9.981	0.0212633
1109	9.987	0.017302
1110	9.993	0.0273101
1111	9.999	0.0227305
1112	10.005	0.0196966
1113	10.011	0.0212214
1114	10.017	0.0232545
1115	10.023	0.0225995
1116	10.029	0.0239671
1117	10.035	0.0208599
1118	10.04	0.0249679
1119	10.046	0.0230134
1120	10.052	0.0231602
1121	10.058	0.0226205
1122	10.064	0.0233488
1123	10.07	0.0254028
1124	10.076	0.0234326
1125	10.082	0.0255548
1126	10.088	0.0257224
1127	10.094	0.0290969
1128	10.1	0.0231392
1129	10.106	0.0233069
1130	10.112	0.0224056
1131	10.118	0.0252299
1132	10.124	0.0219707
1133	10.13	0.025822
1134	10.136	0.0225576
1135	10.142	0.0214624
1136	10.148	0.026084
1137	10.153	0.0207393
1138	10.159	0.0247478
1139	10.165	0.0223899
1140	10.171	0.0207603
1141	10.177	0.0237365
1142	10.183	0.0230344
1143	10.189	0.0264455
1144	10.195	0.0233907
1145	10.201	0.0290445
1146	10.207	0.0264351
1147	10.213	0.0246116
1148	10.219	0.0224842
1149	10.225	0.0255181
1150	10.231	0.0267075
1151	10.237	0.0265608
1152	10.243	0.0290602
1153	10.249	0.029427
1154	10.255	0.0246116
1155	10.26	0.0279756
1156	10.266	0.0304855
1157	10.272	0.029558
1158	10.278	0.027132
1159	10.284	0.027001
1160	10.29	0.0265818
1161	10.296	0.0280437
1162	10.302	0.0298095
1163	10.308	0.0309309
1164	10.314	0.0317326
1165	10.32	0.0269433
1166	10.326	0.0276874
1167	10.332	0.0289292
1168	10.338	0.0291388
1169	10.344	0.0292751
1170	10.35	0.0288454
1171	10.356	0.0280227
1172	10.362	0.0290078
1173	10.368	0.0331421
1174	10.373	0.0331106
1175	10.379	0.0284786
1176	10.385	0.0252823
1177	10.391	0.0274411
1178	10.397	0.0287039
1179	10.403	0.0268385
1180	10.409	0.0306531
1181	10.415	0.0311981
1182	10.421	0.0326757
1183	10.427	0.02971
1184	10.433	0.0438419
1185	10.439	0.106369
1186	10.445	0.258812
1187	10.451	0.401839
1188	10.457	0.345401
1189	10.463	0.200162
1190	10.469	0.105777
1191	10.475	0.0715659
1192	10.48	0.0602112
1193	10.486	0.0512929
1194	10.492	0.0425895
1195	10.498	0.0399539
1196	10.504	0.0463413
1197	10.51	0.0408394
1198	10.516	0.0444287
1199	10.522	0.0437633
1200	10.528	0.0411853
1201	10.534	0.0411591
1202	10.54	0.0383191
1203	10.546	0.0423223
1204	10.552	0.0410228
1205	10.558	0.041814
1206	10.564	0.0341481
1207	10.57	0.0426
1208	10.576	0.0386701
1209	10.582	0.0430244
1210	10.588	0.0388064
1211	10.593	0.0417459
1212	10.599	0.0372082
1213	10.605	0.037313
1214	10.611	0.0394089
1215	10.617	0.0387854
1216	10.623	0.0383505
1217	10.629	0.0402526
1218	10.635	0.0417983
1219	10.641	0.0385286
1220	10.647	0.0376222
1221	10.653	0.0410281
1222	10.659	0.0385863
1223	10.665	0.0446383
1224	10.671	0.0437633
1225	10.677	0.0382352
1226	10.683	0.0378894
1227	10.689	0.0355157
1228	10.695	0.0413948
1229	10.7	0.0464723
1230	10.706	0.039519
1231	10.712	0.0437056
1232	10.718	0.0398805
1233	10.724	0.0413215
1234	10.73	0.0421546
1235	10.736	0.044937
1236	10.742	0.0442401
1237	10.748	0.0426629
1238	10.754	0.0435118
1239	10.76	0.0426367
1240	10.766	0.0438261
1241	10.772	0.0426891
1242	10.778	0.0431921
1243	10.784	0.0415887
1244	10.79	0.0427991
1245	10.796	0.047122
1246	10.802	0.047887
1247	10.808	0.0434489
1248	10.813	0.0434646
1249	10.819	0.0486206
1250	10.825	0.0463937
1251	10.831	0.0441405
1252	10.837	0.0426786
1253	10.843	0.0507061
1254	10.849	0.0508842
1255	10.855	0.0451728
1256	10.861	0.043124
1257	10.867	0.0469805
1258	10.873	0.0461684
1259	10.879	0.0542797
1260	10.885	0.0484634
1261	10.891	0.0475988
1262	10.897	0.0474416
1263	10.903	0.0471901
1264	10.909	0.0492337
1265	10.915	0.0502397
1266	10.921	0.0517593
1267	10.926	0.051665
1268	10.932	0.0507794
1269	10.938	0.0521208
1270	10.944	0.0469543
1271	10.95	0.0546936
1272	10.956	0.0508004
1273	10.962	0.0537714
1274	10.968	0.0540753
1275	10.974	0.0530221
1276	10.98	0.0509995
1277	10.986	0.050879
1278	10.992	0.0519951
1279	10.998	0.0522833
1280	11.004	0.0524667
1281	11.01	0.0521837
1282	11.016	0.0557573
1283	11.022	0.0521366
1284	11.028	0.0519846
1285	11.033	0.0550656
1286	11.039	0.0530378
1287	11.045	0.0532893
1288	11.051	0.0535199
1289	11.057	0.0530483
1290	11.063	0.0590532
1291	11.069	0.0558516
1292	11.075	0.0581205
1293	11.081	0.0553014
1294	11.087	0.0602112
1295	11.093	0.0539391
1296	11.099	0.0560612
1297	11.105	0.0578166
1298	11.111	0.0633813
1299	11.117	0.0616731
1300	11.123	0.062983
1301	11.129	0.0583353
1302	11.135	0.0564332
1303	11.141	0.0586759
1304	11.146	0.0578113
1305	11.152	0.0622285
1306	11.158	0.0595195
1307	11.164	0.0615945
1308	11.17	0.0596924
1309	11.176	0.0637219
1310	11.182	0.0666038
1311	11.188	0.0662003
1312	11.194	0.0652781
1313	11.2	0.0612591
1314	11.206	0.0562184
1315	11.212	0.062129
1316	11.218	0.0629568
1317	11.224	0.06106
1318	11.23	0.060274
1319	11.236	0.0605884
1320	11.242	0.0639419
1321	11.248	0.0699783
1322	11.253	0.0634232
1323	11.259	0.0673688
1324	11.265	0.0689879
1325	11.271	0.0687678
1326	11.277	0.0761036
1327	11.283	0.0687574
1328	11.289	0.0671854
1329	11.295	0.0721842
1330	11.301	0.0696272
1331	11.307	0.069863
1332	11.313	0.0712777
1333	11.319	0.0722419
1334	11.325	0.0748251
1335	11.331	0.0736147
1336	11.337	0.0727659
1337	11.343	0.0799183
1338	11.349	0.0701512
1339	11.355	0.0710053
1340	11.361	0.0737352
1341	11.366	0.0801541
1342	11.372	0.0781157
1343	11.378	0.0740653
1344	11.384	0.0821819
1345	11.39	0.0750504
1346	11.396	0.07089
1347	11.402	0.0778328
1348	11.408	0.0716812
1349	11.414	0.0785821
1350	11.42	0.0767953
1351	11.426	0.0857293
1352	11.432	0.0801907
1353	11.438	0.0829312
1354	11.444	0.0767167
1355	11.45	0.0850376
1356	11.456	0.0922162
1357	11.462	0.079258
1358	11.468	0.0836228
1359	11.473	0.083539
1360	11.479	0.0930231
1361	11.485	0.0856664
1362	11.491	0.0869082
1363	11.497	0.085876
1364	11.503	0.0867353
1365	11.509	0.0928031
1366	11.515	0.0906023
1367	11.521	0.090136
1368	11.527	0.0891456
1369	11.533	0.0830884
1370	11.539	0.0839058
1371	11.545	0.089591
1372	11.551	0.0915874
1373	11.557	0.0922162
1374	11.563	0.087427
1375	11.569	0.0907648
1376	11.575	0.0853939
1377	11.581	0.0947366
1378	11.586	0.0993057
1379	11.592	0.0972307
1380	11.598	0.096057
1381	11.604	0.0926249
1382	11.61	0.0911944
1383	11.616	0.0975084
1384	11.622	0.0933532
1385	11.628	0.100343
1386	11.634	0.10103
1387	11.64	0.100584
1388	11.646	0.0999764
1389	11.652	0.100244
1390	11.658	0.0992219
1391	11.664	0.0967958
1392	11.67	0.0970421
1393	11.676	0.0960046
1394	11.682	0.101166
1395	11.688	0.101417
1396	11.693	0.0980429
1397	11.699	0.101837
1398	11.705	0.107747
1399	11.711	0.100144
1400	11.717	0.100375
1401	11.723	0.101852
1402	11.729	0.104105
1403	11.735	0.107192
1404	11.741	0.111373
1405	11.747	0.100338
1406	11.753	0.10814
1407	11.759	0.107176
1408	11.765	0.103555
1409	11.771	0.110068
1410	11.777	0.102989
1411	11.783	0.107511
1412	11.789	0.106369
1413	11.795	0.10891
1414	11.801	0.105656
1415	11.806	0.107014
1416	11.812	0.106888
1417	11.818	0.108093
1418	11.824	0.109906
1419	11.83	0.112164
1420	11.836	0.103241
1421	11.842	0.107129
1422	11.848	0.108324
1423	11.854	0.109172
1424	11.86	0.116047
1425	11.866	0.108423
1426	11.872	0.115135
1427	11.878	0.110388
1428	11.884	0.108135
1429	11.89	0.113275
1430	11.896	0.112018
1431	11.902	0.113233
1432	11.908	0.109838
1433	11.913	0.107522
1434	11.919	0.119532
1435	11.925	0.114093
1436	11.931	0.105609
1437	11.937	0.107029
1438	11.943	0.111153
1439	11.949	0.111195
1440	11.955	0.110545
1441	11.961	0.116576
1442	11.967	0.1125
1443	11.973	0.111803
1444	11.979	0.109639
1445	11.985	0.116257
1446	11.991	0.108481
1447	11.997	0.116021
1448	12.003	0.11359
1449	12.009	0.114947
1450	12.015	0.117231
1451	12.021	0.118693
1452	12.026	0.119532
1453	12.032	0.113034
1454	12.038	0.116702
1455	12.044	0.117561
1456	12.05	0.112976
1457	12.056	0.116692
1458	12.062	0.11261
1459	12.068	0.114795
1460	12.074	0.119563
1461	12.08	0.116393
1462	12.086	0.114941
1463	12.092	0.120129
1464	12.098	0.121004
1465	12.104	0.120333
1466	12.11	0.124572
1467	12.116	0.127507
1468	12.122	0.122691
1469	12.128	0.117902
1470	12.133	0.123063
1471	12.139	0.11632
1472	12.145	0.117273
1473	12.151	0.124368
1474	12.157	0.12561
1475	12.163	0.118284
1476	12.169	0.121245
1477	12.175	0.124185
1478	12.181	0.117268
1479	12.187	0.127564
1480	12.193	0.125867
1481	12.199	0.123399
1482	12.205	0.128109
1483	12.211	0.12169
1484	12.217	0.122544
1485	12.223	0.116136
1486	12.229	0.123268
1487	12.235	0.126008
1488	12.241	0.125977
1489	12.246	0.129482
1490	12.252	0.131285
1491	12.258	0.130179
1492	12.264	0.12168
1493	12.27	0.123089
1494	12.276	0.131468
1495	12.282	0.125882
1496	12.288	0.131306
1497	12.294	0.129639
1498	12.3	0.123357
1499	12.306	0.128691
1500	12.312	0.133417
1501	12.318	0.121994
1502	12.324	0.128659
1503	12.33	0.140418
1504	12.336	0.123205
1505	12.342	0.126789
1506	12.348	0.128843
1507	12.353	0.118326
1508	12.359	0.132359
1509	12.365	0.131688
1510	12.371	0.12999
1511	12.377	0.131683
1512	12.383	0.132579
1513	12.389	0.129886
1514	12.395	0.135723
1515	12.401	0.124714
1516	12.407	0.130472
1517	12.413	0.135529
1518	12.419	0.132495
1519	12.425	0.133642
1520	12.431	0.134156
1521	12.437	0.137525
1522	12.443	0.130598
1523	12.449	0.135272
1524	12.455	0.129388
1525	12.461	0.137504
1526	12.466	0.134717
1527	12.472	0.137331
1528	12.478	0.128565
1529	12.484	0.138133
1530	12.49	0.135791
1531	12.496	0.133994
1532	12.502	0.133873
1533	12.508	0.137834
1534	12.514	0.140475
1535	12.52	0.132668
1536	12.526	0.129545
1537	12.532	0.133417
1538	12.538	0.130939
1539	12.544	0.142445
1540	12.55	0.130514
1541	12.556	0.134371
1542	12.562	0.136713
1543	12.568	0.138851
1544	12.573	0.134004
1545	12.579	0.136713
1546	12.585	0.140711
1547	12.591	0.131227
1548	12.597	0.141052
1549	12.603	0.135036
1550	12.609	0.132615
1551	12.615	0.138406
1552	12.621	0.136818
1553	12.627	0.133166
1554	12.633	0.144237
1555	12.639	0.142377
1556	12.645	0.129844
1557	12.651	0.14408
1558	12.657	0.150473
1559	12.663	0.135283
1560	12.669	0.142325
1561	12.675	0.141235
1562	12.681	0.135848
1563	12.686	0.148581
1564	12.692	0.149855
1565	12.698	0.135403
1566	12.704	0.147009
1567	12.71	0.134465
1568	12.716	0.144332
1569	12.722	0.144379
1570	12.728	0.141481
1571	12.734	0.148681
1572	12.74	0.147397
1573	12.746	0.138269
1574	12.752	0.141345
1575	12.758	0.141628
1576	12.764	0.143184
1577	12.77	0.148115
1578	12.776	0.140936
1579	12.782	0.142383
1580	12.788	0.147109
1581	12.793	0.139647
1582	12.799	0.143514
1583	12.805	0.146223
1584	12.811	0.140051
1585	12.817	0.147172
1586	12.823	0.145626
1587	12.829	0.144594
1588	12.835	0.140837
1589	12.841	0.152632
1590	12.847	0.141366
1591	12.853	0.144714
1592	12.859	0.148597
1593	12.865	0.14691
1594	12.871	0.146045
1595	12.877	0.154319
1596	12.883	0.145652
1597	12.889	0.147937
1598	12.895	0.152034
1599	12.901	0.147811
1600	12.906	0.146889
1601	12.912	0.147968
1602	12.918	0.141366
1603	12.924	0.156755
1604	12.93	0.153114
1605	12.936	0.151091
1606	12.942	0.149016
1607	12.948	0.140423
1608	12.954	0.15128
1609	12.96	0.144468
1610	12.966	0.153124
1611	12.972	0.141424
1612	12.978	0.158993
1613	12.984	0.146873
1614	12.99	0.153847
1615	12.996	0.139626
1616	13.002	0.151206
1617	13.008	0.147507
1618	13.013	0.155084
1619	13.019	0.143734
1620	13.025	0.147046
1621	13.031	0.149299
1622	13.037	0.155744
1623	13.043	0.147062
1624	13.049	0.152705
1625	13.055	0.152385
1626	13.061	0.15128
1627	13.067	0.152359
1628	13.073	0.154591
1629	13.079	0.154628
1630	13.085	0.160664
1631	13.091	0.148104
1632	13.097	0.152406
1633	13.103	0.153968
1634	13.109	0.156404
1635	13.115	0.149488
1636	13.121	0.150965
1637	13.126	0.163347
1638	13.132	0.154099
1639	13.138	0.151369
1640	13.144	0.154078
1641	13.15	0.152197
1642	13.156	0.151217
1643	13.162	0.157893
1644	13.168	0.156389
1645	13.174	0.161346
1646	13.18	0.1586
1647	13.186	0.154434
1648	13.192	0.157379
1649	13.198	0.153994
1650	13.204	0.159779
1651	13.21	0.151935
1652	13.216	0.164233
1653	13.222	0.16428
1654	13.228	0.155341
1655	13.233	0.157049
1656	13.239	0.15107
1657	13.245	0.160444
1658	13.251	0.155325
1659	13.257	0.163201
1660	13.263	0.162551
1661	13.269	0.171836
1662	13.275	0.156467
1663	13.281	0.15805
1664	13.287	0.147816
1665	13.293	0.16515
1666	13.299	0.160848
1667	13.305	0.154759
1668	13.311	0.162739
1669	13.317	0.160654
1670	13.323	0.154094
1671	13.329	0.158684
1672	13.335	0.161995
1673	13.341	0.157023
1674	13.346	0.15435
1675	13.352	0.153292
1676	13.358	0.159543
1677	13.364	0.163111
1678	13.37	0.159616
1679	13.376	0.155341
1680	13.382	0.159009
1681	13.388	0.149692
1682	13.394	0.151489
1683	13.4	0.159176
1684	13.406	0.156305
1685	13.412	0.154387
1686	13.418	0.161314
1687	13.424	0.168173
1688	13.43	0.157536
1689	13.436	0.156666
1690	13.442	0.160219
1691	13.448	0.160319
1692	13.453	0.163945
1693	13.459	0.155367
1694	13.465	0.16308
1695	13.471	0.152338
1696	13.477	0.155723
1697	13.483	0.1597
1698	13.489	0.151799
1699	13.495	0.161477
1700	13.501	0.160921
1701	13.507	0.151448
1702	13.513	0.166889
1703	13.519	0.151489
1704	13.525	0.156336
1705	13.531	0.150473
1706	13.537	0.163457
1707	13.543	0.157699
1708	13.549	0.163908
1709	13.555	0.157688
1710	13.561	0.156871
1711	13.566	0.154419
1712	13.572	0.156897
1713	13.578	0.152611
1714	13.584	0.157541
1715	13.59	0.161183
1716	13.596	0.164013
1717	13.602	0.162037
1718	13.608	0.163127
1719	13.614	0.157568
1720	13.62	0.171003
1721	13.626	0.158998
1722	13.632	0.163536
1723	13.638	0.167251
1724	13.644	0.155535
1725	13.65	0.161807
1726	13.656	0.162441
1727	13.662	0.164704
1728	13.668	0.151882
1729	13.673	0.166177
1730	13.679	0.152129
1731	13.685	0.162289
1732	13.691	0.152155
1733	13.697	0.158899
1734	13.703	0.159354
1735	13.709	0.159957
1736	13.715	0.164212
1737	13.721	0.160261
1738	13.727	0.166093
1739	13.733	0.158254
1740	13.739	0.168566
1741	13.745	0.161419
1742	13.751	0.159863
1743	13.757	0.176384
1744	13.763	0.170222
1745	13.769	0.167319
1746	13.775	0.166491
1747	13.781	0.166769
1748	13.786	0.160099
1749	13.792	0.165275
1750	13.798	0.167529
1751	13.804	0.159543
1752	13.81	0.163552
1753	13.816	0.164442
1754	13.822	0.168739
1755	13.828	0.171092
1756	13.834	0.174309
1757	13.84	0.171438
1758	13.846	0.168865
1759	13.852	0.155603
1760	13.858	0.15959
1761	13.864	0.164856
1762	13.87	0.172087
1763	13.876	0.16276
1764	13.882	0.172365
1765	13.888	0.162341
1766	13.893	0.163625
1767	13.899	0.156745
1768	13.905	0.155749
1769	13.911	0.165255
1770	13.917	0.158029
1771	13.923	0.164751
1772	13.929	0.163756
1773	13.935	0.158961
1774	13.941	0.163085
1775	13.947	0.170196
1776	13.953	0.154539
1777	13.959	0.157484
1778	13.965	0.171631
1779	13.971	0.167026
1780	13.977	0.157086
1781	13.983	0.167162
1782	13.989	0.167204
1783	13.995	0.168294
1784	14.001	0.166769
1785	14.006	0.161948
1786	14.012	0.153653
1787	14.018	0.162818
1788	14.024	0.16373
1789	14.03	0.161419
1790	14.036	0.1551
1791	14.042	0.157479
1792	14.048	0.161257
1793	14.054	0.160638
1794	14.06	0.16702
1795	14.066	0.161267
1796	14.072	0.162509
1797	14.078	0.161277
1798	14.084	0.175315
1799	14.09	0.163745
1800	14.096	0.162656
1801	14.102	0.160979
1802	14.108	0.159218
1803	14.113	0.171605
1804	14.119	0.16844
1805	14.125	0.166811
1806	14.131	0.169273
1807	14.137	0.160486
1808	14.143	0.168645
1809	14.149	0.158595
1810	14.155	0.159868
1811	14.161	0.166916
1812	14.167	0.175415
1813	14.173	0.169273
1814	14.179	0.173733
1815	14.185	0.166564
1816	14.191	0.171857
1817	14.197	0.16865
1818	14.203	0.165758
1819	14.209	0.162084
1820	14.215	0.176871
1821	14.221	0.170531
1822	14.226	0.173224
1823	14.232	0.167068
1824	14.238	0.167853
1825	14.244	0.170919
1826	14.25	0.171322
1827	14.256	0.159994
1828	14.262	0.169672
1829	14.268	0.170636
1830	14.274	0.168666
1831	14.28	0.170379
1832	14.286	0.162383
1833	14.292	0.167722
1834	14.298	0.167869
1835	14.304	0.161131
1836	14.31	0.159658
1837	14.316	0.163211
1838	14.322	0.169499
1839	14.328	0.166297
1840	14.333	0.164044
1841	14.339	0.170023
1842	14.345	0.163646
1843	14.351	0.157741
1844	14.357	0.161581
1845	14.363	0.16582
1846	14.369	0.162325
1847	14.375	0.172559
1848	14.381	0.168398
1849	14.387	0.166957
1850	14.393	0.162158
1851	14.399	0.16582
1852	14.405	0.165438
1853	14.411	0.164694
1854	14.417	0.163232
1855	14.423	0.164238
1856	14.429	0.162514
1857	14.435	0.164977
1858	14.441	0.162881
1859	14.446	0.161068
1860	14.452	0.16755
1861	14.458	0.162519
1862	14.464	0.169085
1863	14.47	0.16571
1864	14.476	0.16067
1865	14.482	0.166963
1866	14.488	0.159302
1867	14.494	0.172318
1868	14.5	0.16155
1869	14.506	0.169106
1870	14.512	0.172601
1871	14.518	0.16822
1872	14.524	0.160769
1873	14.53	0.17248
1874	14.536	0.16155
1875	14.542	0.169609
1876	14.548	0.157405
1877	14.553	0.177432
1878	14.559	0.175184
1879	14.565	0.171113
1880	14.571	0.163185
1881	14.577	0.175897
1882	14.583	0.172218
1883	14.589	0.174162
1884	14.595	0.160837
1885	14.601	0.164809
1886	14.607	0.168142
1887	14.613	0.165186
1888	14.619	0.172087
1889	14.625	0.166842
1890	14.631	0.17061
1891	14.637	0.171265
1892	14.643	0.162697
1893	14.649	0.171747
1894	14.655	0.16526
1895	14.661	0.167377
1896	14.666	0.166884
1897	14.672	0.172098
1898	14.678	0.172171
1899	14.684	0.167586
1900	14.69	0.173853
1901	14.696	0.169777
1902	14.702	0.172003
1903	14.708	0.179303
1904	14.714	0.172637
1905	14.72	0.170211
1906	14.726	0.162451
1907	14.732	0.171893
1908	14.738	0.172286
1909	14.744	0.17248
1910	14.75	0.17389
1911	14.756	0.169012
1912	14.762	0.159292
1913	14.768	0.17029
1914	14.773	0.169761
1915	14.779	0.166879
1916	14.785	0.176064
1917	14.791	0.162346
1918	14.797	0.160371
1919	14.803	0.172973
1920	14.809	0.166234
1921	14.815	0.171401
1922	14.821	0.16789
1923	14.827	0.166596
1924	14.833	0.175378
1925	14.839	0.166156
1926	14.845	0.172438
1927	14.851	0.174367
1928	14.857	0.169672
1929	14.863	0.171071
1930	14.869	0.171726
1931	14.875	0.177139
1932	14.881	0.172328
1933	14.886	0.17553
1934	14.892	0.172889
1935	14.898	0.173135
1936	14.904	0.173182
1937	14.91	0.170164
1938	14.916	0.180099
1939	14.922	0.164558
1940	14.928	0.175184
1941	14.934	0.162849
1942	14.94	0.172973
1943	14.946	0.169719
1944	14.952	0.170819
1945	14.958	0.167743
1946	14.964	0.172082
1947	14.97	0.176599
1948	14.976	0.169342
1949	14.982	0.175252
1950	14.988	0.178726
1951	14.993	0.163672
1952	14.999	0.175965
1953	15.005	0.16658
1954	15.011	0.173916
1955	15.017	0.170227
1956	15.023	0.170924
1957	15.029	0.163515
1958	15.035	0.174623
1959	15.041	0.179795
1960	15.047	0.175802
1961	15.053	0.170206
1962	15.059	0.169813
1963	15.065	0.173188
1964	15.071	0.178097
1965	15.077	0.164212
1966	15.083	0.168152
1967	15.089	0.166103
1968	15.095	0.172297
1969	15.101	0.172077
1970	15.106	0.172292
1971	15.112	0.175535
1972	15.118	0.17772
1973	15.124	0.172224
1974	15.13	0.181068
1975	15.136	0.178312
1976	15.142	0.163347
1977	15.148	0.16777
1978	15.154	0.175614
1979	15.16	0.176028
1980	15.166	0.171893
1981	15.172	0.164338
1982	15.178	0.168435
1983	15.184	0.181283
1984	15.19	0.176457
1985	15.196	0.172842
1986	15.202	0.179067
1987	15.208	0.168928
1988	15.213	0.171479
1989	15.219	0.177552
1990	15.225	0.176976
1991	15.231	0.171521
1992	15.237	0.171836
1993	15.243	0.178716
1994	15.249	0.174943
1995	15.255	0.168681
1996	15.261	0.162304
1997	15.267	0.176038
[truncated: 206 more rows]
