# Supplementary material for: Engineering Escherichia coli for the production of butyl octanoate from endogenous octanoyl-CoA
Source: PeerJ. 2019 Jul 1;7:e6971. doi: 10.7717/peerj.6971 (PMC6610577; doi:10.7717/peerj.6971)
Supplement: Supplemental Information 13 [file peerj-07-6971-s013.xlsx]

## Sheet: raw data
Well / Set	Dye	Content	Description	Efficiency	C(t)	Quantity	Avg C(t)	Max C(t)	Min C(t)	C(t) SD	Avg Quantity	Max Quantity	Min Quantity	Quantity SD	Wellset Type
B2	SBG1	Sample	Ter1 50ng	0.7327	25.6
C2	SBG1	Sample	Ter1 50ng	0.7319	25.55
D2	SBG1	Sample	Ter1 50ng	0.7657	25.52
E2	SBG1	Sample		0.7144	18.15
F2	SBG1	Sample		0.6911	18.1
G2	SBG1	Sample		0.6876	18.09
B3	SBG1	Sample		0.7295	25.46
C3	SBG1	Sample		0.6909	25.25
D3	SBG1	Sample		0.7127	25.39
E3	SBG1	Sample		0.6755	18.02
F3	SBG1	Sample		0.6702	18
G3	SBG1	Sample		0.6972	18.06
B4	SBG1	Sample		0.6959	26.12
C4	SBG1	Sample		0.7068	25.97
D4	SBG1	Sample		0.5779	25.93
E4	SBG1	Sample		0.6713	18.11
F4	SBG1	Sample		0.7206	18.18
G4	SBG1	Sample		0.7039	18.17
B5	SBG1	Sample		0.7411	26.31
C5	SBG1	Sample		0.7032	26.36
D5	SBG1	Sample		0.669	26.27
E5	SBG1	Sample		0.6352	16.77
F5	SBG1	Sample		0.7158	16.84
G5	SBG1	Sample		0.6768	16.81
B6	SBG1	Sample		0.7762	25.91
C6	SBG1	Sample		0.7721	25.98
D6	SBG1	Sample		0.6108	25.84
E6	SBG1	Sample		0.7303	16.46
F6	SBG1	Sample		0.7065	16.35
G6	SBG1	Sample		0.6628	16.37
B7	SBG1	Sample		0.6958	27.21
C7	SBG1	Sample		0.7122	27.28
D7	SBG1	Sample		0.6862	27.45
E7	SBG1	Sample		0.7268	18.44
F7	SBG1	Sample		0.6971	18.3
G7	SBG1	Sample		0.7213	18.3
B8	SBG1	Sample		0.7383	28.08
C8	SBG1	Sample		0.714	28.06
D8	SBG1	Sample		0.6994	27.89
E8	SBG1	Sample		0.6991	18.19
F8	SBG1	Sample		0.6591	18.14
G8	SBG1	Sample		0.7188	18.2
B9	SBG1	Sample		N/A	N/A
C9	SBG1	Sample		N/A	N/A
D9	SBG1	Sample		N/A	N/A
E9	SBG1	Sample		N/A	N/A
F9	SBG1	Sample		N/A	N/A
G9	SBG1	Sample		N/A	N/A
C10	SBG1	Sample		0.6865	27.88
E10	SBG1	Sample		0.6266	25.24

## Sheet: AAT induced
induced
strain	ct rrsA			avg ct rrsA	delta ct target	E(rrsA) ^delta ct		ct AAT			avg ct AAT	delta ct target	E(aat) ^delta ct		FOLD CHANGE		FC AVG	FC STDEV
BEST01-1	18.15	18.1	18.09	18.1133	7.12667	135.326		25.6	25.55	25.52	25.5567	2.32333	4.92213		0.0363724	5.15158	4.85644	0.858759
BEST01-2	18.02	18	18.06	18.0267	7.21333	143.648		25.46	25.25	25.39	25.3667	2.51333	5.60733		0.0390351	5.52872
BEST01-3	18.11	18.18	18.17	18.1533	7.08667	131.649		26.12	25.97	25.93	26.0067	1.87333	3.61486		0.0274583	3.88904
BEST04-1	16.77	16.84	16.81	16.8067	8.43333	332.788		26.31	26.36	26.27	26.3133	1.56667	2.92908		0.00880164	1.24662	1.4321	0.329871
BEST04-2	16.46	16.35	16.37	16.3933	8.84667	442.368		25.91	25.98	25.84	25.91	1.97	3.86269		0.00873185	1.23673
BEST04-3	18.44	18.3	18.3	18.3467	6.89333	115.239		27.21	27.28	27.45	27.3133	0.566667	1.47509		0.0128003	1.81296
wt	18.19	18.14	18.2	18.1767	7.06333	129.551		28.08	28.06	27.89	28.01	-0.13	0.914684		0.00706043	1	1
BLANK				25.24							27.88					WT	pBEST01	pBEST04
																1	4.85644	1.4321
																0	0.858759	0.329871
