# Supplementary material for: Engineering Escherichia coli for the production of butyl octanoate from endogenous octanoyl-CoA
Source: PeerJ. 2019 Jul 1;7:e6971. doi: 10.7717/peerj.6971 (PMC6610577; doi:10.7717/peerj.6971)
Supplement: Supplemental Information 14 [file peerj-07-6971-s014.xlsx]

## Sheet: Sheet1
area	AAT	AAT	AAT	LF	LF	LF	SG	SG	SG	LFSG	LFSG	LFSG	AAT FI	AAT FI	AAT FI
	1	2	3	1	2	3	1	2	3	1	2	3	1	2	3			slope	y-int
Butyl Butyrate	370186	315260	330737	418503	245897	219860	371152	482280	557160	201024	514869	479064	60094	60215	56321		BB	2305	40091
Butyl Hexanoate	286564	212312	260004	474918	255216	250535	629933	765529	1007093	415041	790611	839384	0	0	0		BH	5252	-37856
Butyl Octanoate	45760	43703	33480	62996	79546	74150	145676	150164	195110	174449	196080	175676	0	0	0		BO	9073	5890
OD	4.16	4.42	4.26	4.19	4.15	4.4	3.98	4.17	3.95	3.92	4.11	3.98	4.22	4.07	4.14
mg/L sample	AAT	AAT	AAT	LF	LF	LF	SG	SG	SG	LFSG	LFSG	LFSG	FI	FI	FI
	1	2	3	1	2	3	1	2	3	1	2	3	1	2	3
Butyl Butyrate	143.208	119.379	126.094	164.17	89.2868	77.9909	143.627	191.839	224.325	69.8191	205.977	190.444	8.67809	8.73059	7.04121
Butyl Hexanoate	61.7708	47.6329	56.7136	97.634	55.802	54.9107	127.149	152.967	198.962	86.2332	157.743	167.03	0	0	0
Butyl Octanoate	4.39436	4.16764	3.04089	6.29406	8.11815	7.52342	15.4068	15.9015	20.8553	18.5781	20.9622	18.7133	0	0	0
avg	AAT	LF	SG	LFSG	FI		stndev	AAT	LF	SG	LFSG	FI
Butyl Butyrate	129.56	83.6388	186.597	198.211	8.14996		Butyl Butyrate	12.287	7.98739	40.6034	10.9839	0.960564
Butyl Hexanoate	55.3724	55.3563	159.693	162.386	0		Butyl Hexanoate	7.16372	0.63023	36.3757	6.56659	0
Butyl Octanoate	3.86763	7.31188	17.3879	19.4179	0		Butyl Octanoate	0.724895	0.930265	3.01305	1.33913	0
mg/L broth	AAT16-wt	AAT16-F185I	AAT16-S99G	AAT16-L178F	AAT16-S99G-L178F			AAT	F185F	S99G	L178F	S99G L178F
Butyl Butyrate	7.80484	0.490962	11.2408	5.03848	11.9404		Butyl Butyrate	0.740178	0.0578653	2.44599	0.481168	0.661683
Butyl Hexanoate	3.33569	0	9.62006	3.33472	9.78231		Butyl Hexanoate	0.431549	0	2.1913	0.0379656	0.395578
Butyl Octanoate	0.23299	0	1.04746	0.440475	1.16975		Butyl Octanoate	0.0436684	0	0.181509	0.05604	0.0806707
OD600	4.28	4.14333	4.03333	4.24667	4.00333		OD600	0.131149	0.0750555	0.119304	0.109646	0.0971253
