# Supplementary material for: EngineeringEscherichia colifor the production of butyl octanoate from endogenous octanoyl-CoA
Source: PeerJ journal article supplement (doi:10.7717/peerj.6971), 2019-07-01
Supplement: Supplementary_Figure_2.pdf [file Supplementary_Figure_2.pdf]

> Harmonised *AAT16* sequence from *A. chinensis*

ATGGCGTCTTTTCCGCCTTCGTTAGTTTTACAGTTCGCCGCAACGAGCCTACGCTGGTGTACCTAGCAAATC  
GACGCCGCGGAATTAACAGTTATCTGACATAGATGATCAGGAAGGTTTACGGTTTTCAAGTGCCTGTTATC  
ATGTTCTACAAGCGCAAACCTGTCGATGGAAGGTGAAGACCCTGTAAAGGTAATCCGCGAAGCGTTAGCGGAA  
GCGCTGGTGTACTACCCGTTTCGACGGTCGCTGATTGAGGGTCCAAATCGGAAGCTGATGGTGGATTGTA  
CAAGTGAAGGGGTGTTATTCATAGAGGCGGATGCGGATATTGAGGTCAATCAACTCATTGGTGACACGATTGA  
TCCGGGTTTTAGCTACCTCGACGAGCTGCTGCATGACGTGCCGGGAGCGAAGGTATCCTGGGGTGTCCGTTA  
CTGCTGATTCAAGTTACGCGCTTTCGCTGTGGTGGTGGCTTTTGCAATACGACTCAATCACACGATGTCTGA  
TGCCCCGGGGTATGTCAGCTTCTTACCACATTGCGGAGTTTGCGCGGGGGCGGAGGGTGCGCCGAGCGTT  
CCGCCCCGTTTGGCAGCGGAGTTCCTCGCGGGCGGCCAGCCGCGTGCATCACGTTCCAACATCACGAATACG  
AGCAGGTTATCAATACGACGACAGATGACAATAAGAGTATGACGCACAAAAGCTTTTTTTTCGGTCCAAAAGA  
GATACGCGCAATTCGGAGTCATTTTCCGCCGCACTATCGGTCTGTAAGTTTCGACCTTCGACGTATTAACGGCTT  
GCCTTTGGCGCTGTGAACTGCGCGCTGGGGCTTGACCCTCCGAAGACAGTGCAGGATCTCGTGTGCGGCAAA  
TGGTCCGGGTAAACACGACTTACATGTACCGCGGGTACTATGGTAACGTATTTGCATTTCTGCGGTAGTGT  
CGCGCGCGGGCATGATTAGCACCAGCTCGCTGGAATACACAGTGGAGGAGGTTAAAAAGGCTAAAGCGCGCA  
TGACGGGTGAGTATTTACGCTCTGTTGCGGATCTGATGGTGACGAAAGGTCGGCCGTTATATACGGTTGCGGG  
GAACTATATTGTTAGCGATAACAACGCGGGTGGGGTTTTGACGCTATAGATTTTGGGTGGGGGAAGCCAGTATAT  
GGGGGGCTGCGCGCGCTTTCCCGCTGATTAGTTTCTATGCGCGCTTTAAGAATAATCGCGGGGAAGATGGGA  
CCGTTGTATTAATTTGTCTGCCGGAAGCAGCGATGAAGCGCTTTCAGGATGAGCTGAAAAAGATGACCGAAGA  
GCATGTTGACGGTCCGTTTGAATACAAATTAATTAAGGTGATGTGCAAGTTATAA

> Optimised *FATB1* sequence from *C. palustris*

ATGGTTGCAGCAGCAGCAAGCAGCGCATGTTTTCCGGTCCGAGTCCGGGTGCAAGCCGAAACCGGGTAAAT  
TAGGTAATTGGAGCAGCAGCCTGAGTCCGAGCCTGAAACCGAAAAGCATTCCGAATGGTGGTTTTACAGGTTAA  
AGCAATGCAAGCGCACATCCGAAAGCCAATGGTAGCGCAGTTACCCTGAAAAGCGGTAGCCTGAATACCCA  
AGAAGATACCCTGAGCAGCAGTCCGCTCCGCGTGCTTTTTTAACCAGCTGCCGGATTGGAGCATGCTGCTG  
ACCGCAATTACCACCGTTTTTGTGACCCGAAAAACGTTGGACCATGTTTGATCGTAAAAGCAAACGTCCGA  
ATATGCTGATGGATAGCTTTGGTCTGGAACGTGTTGTTCCAGGATGGTCTGGTTTTTCGTCAGAGCTTTAGCATT  
CGTAGCATGAAATTTGTGACAGATCGTACCGAAGCATTGAAACCGTTATGAATCATGTTCAAGAAACCAGCC  
TGAATCAGTGCAAAAAGCATTGGTCTGCTAGCATGTTGTTTTGGTCTGATCCGAAATGTGTAACGTGATCT  
GATTTGGGTTGTGACCCGATGAAAATTATGGTTAATCGTTATCCGACCTGGGGTGATACCATTGAAGTTAGC  
ACCTGGCTGAGCCAGAGCGGTAATAATTGGTATGGGTCTGATTGGCTGATTAGCGATTGTAATACCGGTGAAA  
TTCTGGTTCGTGCAACCAGCGTTTATGCAATGATGAATCAGAAAAACCGTCCGCTTTAGCAAACCTGCCGATGA  
AGTTCGTCAAGAATTTGCACCCGATTTTCTGGATAGCCCTCCGGCAATTGAAGATAATGATGGTAAACTGCAG  
AAATTTGATGTCAAAACCGGTGATAGCATTGCAAAAGGTCTGACCCCTGGTTGGTATGATCTGGATGTTAATC  
AGCATGTTAGCAACGTGAAATATATCGGCTGGATTCTGGAAAGCATGCCGACCAGGTTCTGGAAACCCAAG  
AACTGTGTAGTCTGACCCCTGGAATATCGTCTGTAATGTGGTCTGATAGCGTCTGGAAGCGTTACCAGCAT  
GGATCCGAGCAAAGTTGGTGTATCGTTTTACAGTATCGTCATCTGCTGCGTCTGGAAGATGGTGCAGATATTATG  
AAAGGTCGTACCGAATGGCGTCCGAAAAATGCAGGCACCAATGGTGCAATTAGCACCGGTAAAACCTAA

> Optimised *FadD-V451A* sequence from *E. coli*

ATGAAAAAAGTGTGGCTGAATCGCTATCCGGCAGATGTTCCGACCGAAATTAATCCGGATCGTTATCAGAGTC  
TGGTGGATATGTTTGAACAGAGCGTTGCACGTTATGCAGATCAGCCTGCCTTTGTTAATATGGGTGAAGTTATG  
ACCTTTCGCAAACCTGGAAGAACGTAGCCGTGCATTTGCAGCATATCTGCAGCAAGGTCTGGGTCTGAAAAAG  
GTGATCGTGTGGCCTGATGATGCCGAATCTGCTGCAGTATCCGGTGCAGTCTGGTATTCTGCGTGCAGGT  
ATGATTGTTGTTAATGTGAATCCGCTGTATACACCGCGTGAACGAAACATCAGCTGAATGATAGCGGTGCAA  
GCGCCATTGTTATTGTTAGCAATTTTGCACACACCCCTGAAAAAAGTTGTTGATAAAAACCGCAGTTCAGCATGT  
GATTCTGACCCGTATGGGTGATCAGCTGAGTACCGCAAAAAGGCACCGTTGTTAATTTTGGTGAATAACATT  
AAACGCCTGGTGCCGAAATATCATCTGCCTGATGCCATTAGCTTTCGTAGTGCAGTGCATAATGGTTATCGTAT  
GCAGTATGTTAAACCGGAACCTGGTCCGGAAGATCTGGCATTCTGCAGTATACAGGTGGCACCACCGGTGTT  
GCAAAAGTGCCAATGCTGACCCATCGTAATATGCTGGCAATCTGGAACAGGTTAATGCAACCTATGGTCCCG  
TGCTGATCCGGTAAAGAAGTGGTTGTTACCAGTCCGCTGTATCATATCTTTGCCCTACCATTAATTTGC  
CTGCTGTTTATTGAATTAGGTGGTCAAGAACCTGCTGATTACCAATCCGCGTATATTCTGGTCTGGTGAAGA  
GCTGGCAAAAATATCCGTTTACCGCCATTACCGGTGTGAATACCCTGTTAATGCACTGCTGAATAACAAAGAA  
TTCCAGCAGCTGGATTTTACGACCGTGCATCTGAGTGCCGGTGGTGGTATGCCGGTGCAGCAGGTTGTTGCAG  
AACGTTGGGTTAAACTGACAGGTGAGTATCTGCTGGAAGGTTATGGTCTGACCGAATGTGCACCGCTGGTTAG  
CGTTAATCCGTATGATATTGATTATCATAGCGGTAGCATTGGCCTGCCGGTGCCGAGCACCAGCAAAACTG  
GTGGATGATGATAATGAAGTTCCGCTGGTCAAGCCTGGTGAACGTGTGTGTTAAAGGTCCGCAGGTTATGT  
TAGGTTATTGGCAGCTCCGGATGCAACCGATGAAATATCAAAAATGGTTGGCTGCATACGGGTGATATTGC  
AGTTATGGATGAAGAAGTTTTCTGCGTATTGCCGATCGAAAAAAGACATGATTCTGGTGTGAGCGGCTTTAAC

GTTTATCCGAATGAAATCGAAGATGTGGTTATGCAGCATCCTGGTGTTCAAGAGGTTGCAGCCGTTGGTGTT  
CGAGCGGTAGCTCAGGTGAAGCAGTAAAAATCTTCGTGGTGAAAAAAGATCCGTCCTGACCGAAGAAAGCC  
TGGTTACCTTTTGTTCGTCGCCAGCTGACCGGTTATAAAGTCCGAAACTGGTTGAATTTTCGTGATGAACTGCCG  
AAAAGTAACGTGGGTAAAATTCTGCGTCGTGAACTGCGTGATGAAGCACGTGGTAAAGTTGATAATAAAGCC  
TAA
