# Supplementary material for: EngineeringEscherichia colifor the production of butyl octanoate from endogenous octanoyl-CoA
Source: PeerJ journal article supplement (doi:10.7717/peerj.6971), 2019-07-01
Supplement: Supplementary_Figure_3.pdf [file Supplementary_Figure_3.pdf]

# MolProbity Ramachandran analysis

AAT16\_model\_clean\_trimmed.pdb, model 3223

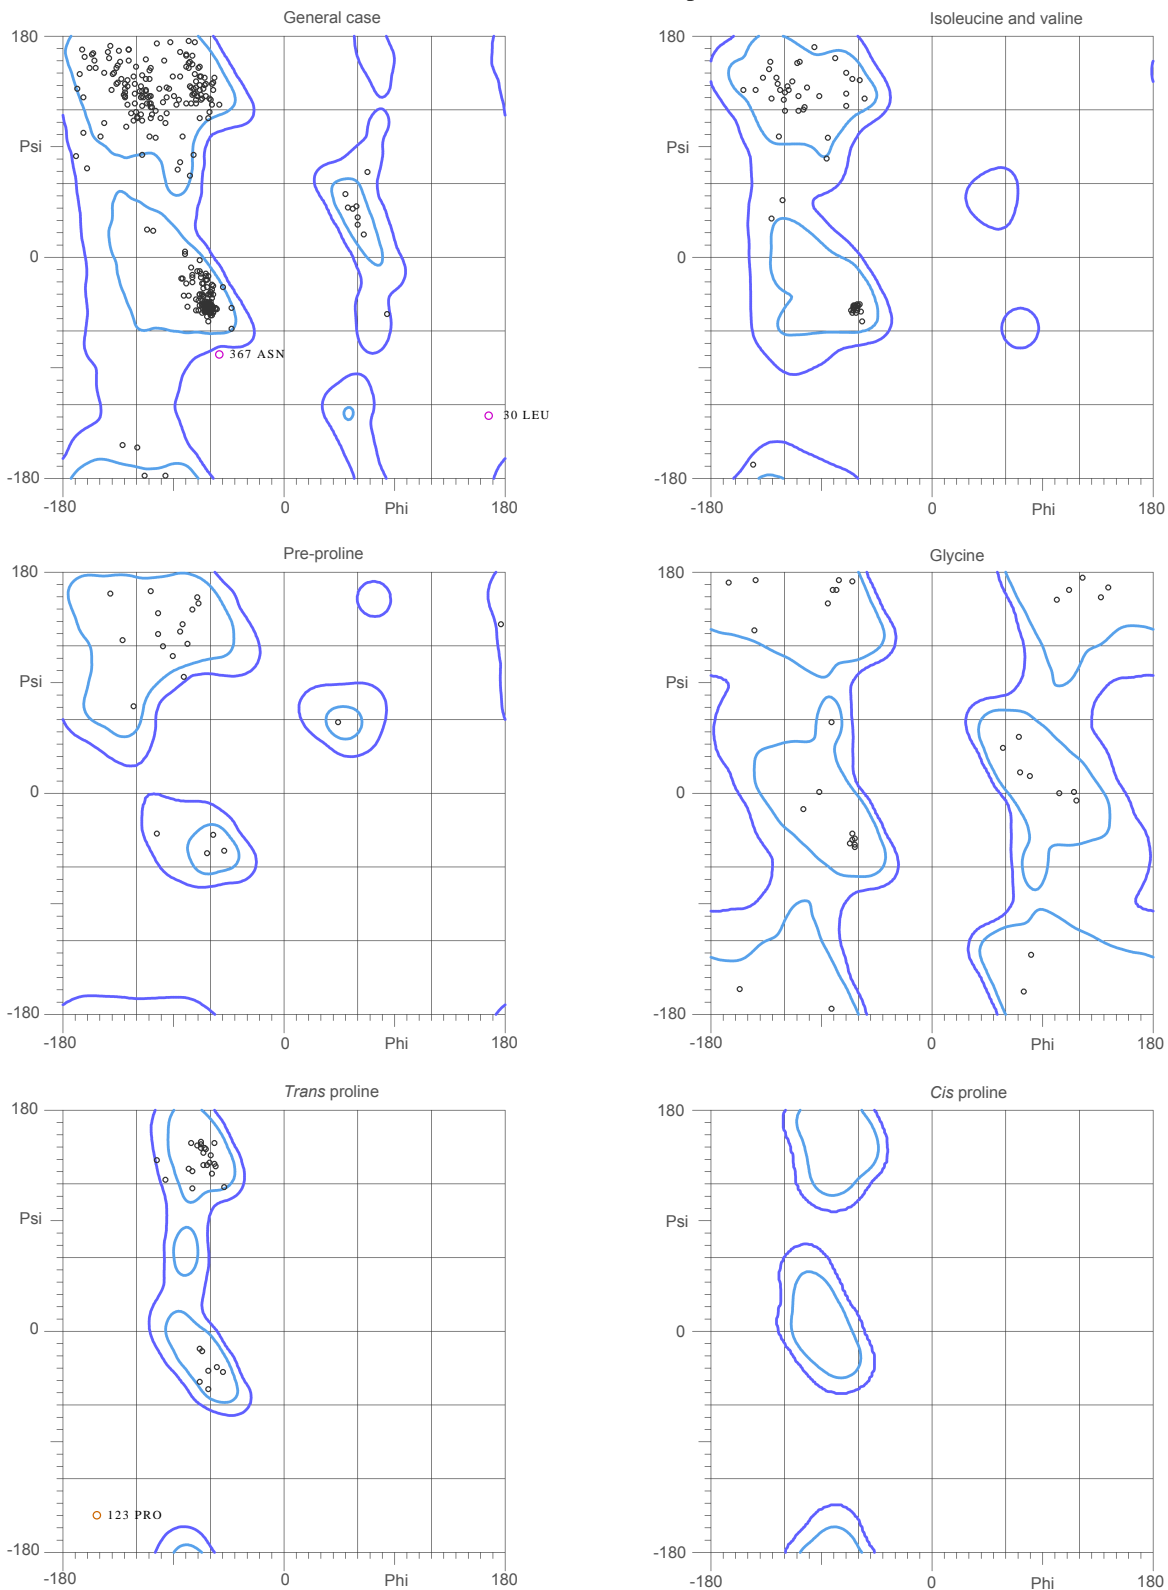

95.4% (431/452) of all residues were in favored (98%) regions.  
99.3% (449/452) of all residues were in allowed (>99.8%) regions.

There were 3 outliers (phi, psi):

- 30 LEU (167.9, -129.2)
- 123 PRO (-153.6, -150.7)
- 367 ASN (-53.2, -80.0)
