# Supplementary material for: EngineeringEscherichia colifor the production of butyl octanoate from endogenous octanoyl-CoA
Source: PeerJ journal article supplement (doi:10.7717/peerj.6971), 2019-07-01
Supplement: Supplementary_Figure_5.pdf [file Supplementary_Figure_5.pdf]

AeAAT 1 ----MASSV---RLVKKPVLAPVDPTPSTLSLSSDSDQLFLRFPTTEYLIVYASPH-G  
Ban-AAAT 1 ----MSFAVTRTSRSLTPCGVTPFGSLGLSADRVPLGRHMVRSLHVE-----  
MpAAT1 1 ----MMSFSLVQVKRLQPELITPAKSTPQETKELSDDDQESLRVQPLITMCKYKDNPSL  
AcAAT 1 -MASFPFSLVTVRNEPTLPLPSKSTPREIKQLSDDDQEGLRFOVPIVIMFYKRKL-S  
CmAAT1 1 ----DFSFHVRCQPELTAPANPTFYEKQLSDVDDQQLRLOLPPFVNIYPHNP-S  
CmAAT2 1 METMQTIDFSFQVRCQPELTAPANPTFYEKQLSDVDDQQLRFOVPLVNIYHHNP-S  
VpAAT 1 -MAEKASSLMFNVRHPELITPAKPTREIKLLSDDDQDGLRFQVPIIQFYKNN-S  
CmAAT3 1 ----MASSLVQVQVRSQPQLTPPSDPTPHEKQLSDDDQEGLRFOVPIQFYRHDP-R  
BEBT 1 --MAHDQSLSEVCRKPELITPAKQTPHEKQLSDVDDQEGLRFOVPIQFYKHNES  
BEAT 1 ----MNVTMHSSKLLKPSIPTPNHQLNLSLDQIQTPFYVGLIFHYETLSDN  
CmAAT4 1 ----MEVKVLSKETITPSSPTPHQLNLSLDQLSPMLYPLIFYPMKKSY  
RhAAT 1 ----MEKIEVSIISRDTIKPSAAS-SSHPYKLSLDQFTPTTYFPIVIFYPITDRV  
SAAT 1 ----MEKIEVSINSKHTIKPSTS-SPLQFYKLTLDQLTPPAYPIVIFYPITDHD  
VAAT 1 ----MEKIEVSIISKHTIKPSTS-SPLQFYKLTLDQLTPPSYPMVIFYPITGPA

AeAAT 52 VD--RAVTAARVKAALARSLVFYYPLAGRVTFRPD-STGLDVCVQVQAGLLEAVSVYTA  
Ban-AAAT 46 RQ--GREPARTIREALSALVYYPFAGRFVLDPEGGGEVRYACTGEGAWFLEAKADCSL  
MpAAT1 56 NK--NRNPVKAATREALSRALVYYPFAGRLREGP--NRKLVVFCNCEGELFVEASADVLL  
AcAAT 58 ME--GEDPVKVIKEALAEALVYYPFAGRLREGP--NRKLMVFCSEGLFVEADADVEV  
CmAAT1 52 IE--GRDPVKVIKEALAKALVYYPFAGRLREGP--GRKLFVFCCTGEGELFVEADADVSL  
CmAAT2 59 IE--GRDPVKVIKEALAKALVYYPFAGRLREGP--GRKLFVFCCTGEGELFVEADADVSL  
VpAAT 58 MQ--GKNPAKIKSALAEALVYYPFAGRLREGF--GRKLMVFCCTGEGELFVEADADVTL  
CmAAT3 55 MA--GTDPARVIKEALAKALVYYPFAGRLREGP--GRKLFVFCCTGEGVMFVEADADVSL  
BEBT 58 MQ--ERDPVQVIREALAEALVYYPFAGRLREVD--GRKLVVFCCTGEGVMFVEADADVTL  
BEAT 51 ----SDITLSKDESSLSETLTLYYHLAGRYN----CTDCVTECNDQIGYVETAFDVVL  
CmAAT4 51 QHQDNKAIATIKTSLSKTLSRYLLAGRII----GK-S-HCNDKGAFFVEATINSNM  
RhAAT 53 FN--LPQTLTDKNTLSQALTLYYHPLSGRIK----NN-LYLDDFEAGIPYIPEARVNFHM  
SAAT 53 FN--LPQTLADLRQALSETLTLYYPLSGRVK----NN-LYLDDFEAGIPYIPEARVNCDM  
VAAT 53 VF--NLQTLADLRHALSETLTLYYPLSGRVK----NN-LYLDDFEAGIPYIPEARVNCDM

AeAAT 109 SFQRA--PRSVTEWRKLLIVE----V--FKVVPPLVWQITWLSDCVVALGVGFSFCV  
Ban-AAAT 104 EVKYLDTPL--MIPEDALLPKPCPLN---PIDLP-LMIQVTEFVGGGFVGLISVHTI  
MpAAT1 112 EQL-GDKLFPCLLE-FLYNFPGSDG---TIDCPLLLIQVTCCLTGGFIALRINHTM  
AcAAT 114 NQLIGTIDDFGSYLE-LLHDVPGSEG---LIGCPLLLIQVTRFRGGNAFAIRNHTM  
CmAAT1 108 EEF-WDTLPYSLSSQNNIHNALNSDE---VINSPLLIQVTRLKCGGFIFGLCFNHTM  
CmAAT2 115 EQF-RDTPYSLSSMNNIHNLSNSDG---VINSPLLIQVTRLKCGGFIFGHFDHTM  
VpAAT 114 HEF-GDDLPFPCLLE-LLYDVEGSSG---LIDTPLLLIQVTRLKCGGFIFLIRNHTM  
CmAAT3 111 EQF-GDALQFPFCLLE-PLFDVPNSSG---VIDCPLLLIQVTRLKCGGFIFLIRNHTM  
BEBT 114 EQF-GDALQFPFCLLE-LLFDVPGSSG---LIDSPLLIQVTRLKCGSFIFLIRNHTM  
BEAT 102 HQFLLG---EESNNLL-LVGLSGFLSE---TETPTLAAIQNMFKCGGLVCAQFNHII  
CmAAT4 104 FDIKLE---FNNEVLTLLPCSLLCN-TKPEEYFQIVVQANIFECGGIASSLCHIKK  
RhAAT 105 IDFLRL---EKIEWLNE-FVPMAPYRKETIS-EFLPLLGIQVNIFFDS-GIAGVSVSHKI  
SAAT 105 IDFLRL---RKIECLNE-FVPIKPFMEAISDERYPLLGVQVNVFDS-GIAGVSVSHKI  
VAAT 105 NDFLRL---EKIECLNE-FVPIKPFMEAISDERYPLLGVQVNIFFNS-GIAGVSVSHKI

AeAAT 159 IDGIGSSEFLNFAEATGRARLSEFO----PKPVWDRH--LLNSAGRTN--GTH---P  
Ban-AAAT 158 ADGLGVVQFINAVAEARGLP-K--PT----VEPAVRSRE--VIPN--PPKPPGG---P  
MpAAT1 167 CDAAGLLFLTAFAEARGAH-A--PS----ILPVWERE--LLFARDPPRTCAH---H  
AcAAT 170 SDAPGLVQLITTAFAEARGAEGA--PS----VPPVWORE--FLAARQPPSTFQH---H  
CmAAT1 164 ADGFGVQVFMATAEARGAF-A--PS----ILPVQORA--LLTARDPPRTVFRH---Y  
CmAAT2 171 ADGFGVQVFMATAEARGAF-A--PS----ILPVQORA--LLTARDPPRTVFRH---Y  
VpAAT 169 SDASGLVQVMTAVGEARGQR-S--IS----IQPVWERH--LLNARDPPRTTHIH---H  
CmAAT3 166 SDASGLVQVMTAVGEARGAT-A--PS----VRPVQORA--LLNARDPPKVTCHH---R  
BEBT 169 ADAAGVLFMRAVGEARGAA-T--PS----TLPVWDRH--LLNARVPPQVTFNH---R  
BEAT 155 GDMFTLSTFNSWAKACRVCIK-----EVAHPTTEGLAP-LMPSAK-----  
CmAAT4 159 IDAATFCCFLSWATTNRELLSLDHSSPNNNMVCDVKSFSSIFPQTN--LPPFQSLIN  
RhAAT 159 NDGQTASCFLSWVAFRGYRN-----KTIHFNLSQAALLPSPRD--DPEK----  
SAAT 160 IDGGTADCFLSWCAFRGCRE-----NIIHFPSLSEAALLPSPRD--DPEK----  
VAAT 160 IDGRTSDCFLSWCAFRGSRD-----KTIHFNLSQAALLPSPRD--DPEK----

AeAAT 208 EHGKRVPLLSGFV-TRFTQERISPTSIITFDKTKELNIAMSTSQEG---E--FPYSFE  
Ban-AAAT 203 P-----V---FPSFKLHATVDLSPDHDHVS-----RHLE---LTGQRCSFTFD  
MpAAT1 214 EYEDVYGHSDGSYASSNQSNMQRSEFGAKEMRVLRK-----QIEP---HLISTCSFTFD  
AcAAT 218 EYEQVINTT--T---DDNKSITKSTFIFGPKETRAIIRS-----HFEP---HYISVCSFTFD  
CmAAT1 211 EYDQVDMKSGL---IPVNSKIDQLFVFSQLQISTLRQ----TLPA---HLDCPS--FE  
CmAAT2 218 EYDQVDMTKSTL---IPANNMIDRLFTFTQRIISTLRQ----TLPA---HLDCSS--FE  
VpAAT 216 EYDDLETKGTI---IPLDDMVHRSEFVFGPSEMAAIRR-----LVPA---HFVRS--TSE  
CmAAT3 213 EYDEVDMTKGTI---IPLDDVAHRSEFVFGPSEMAIRK-----ALPS---HLRQCS--FE

BEBT 216 **EYEEV**KGT--IF---TPFDD**AHR**ST**FG**ST**ISA**MRK-----Q**IE**P---H**L**SC**ST**T**IE**  
 BEAT 194 -V**LN**FP**PP**-----P**S**F**E**GV**KF**V**SK**RV**FH**EN**AT**TR**LR**KEATEEDGDGDD**DQ**K**SR**P**SR**VD  
 CmAAAT4 217 ND**KAV**FP**PP**-----S**S**IF**NR**RR**FR**Q**ER**SE**AT**LD**L**AKAK**SC**-----D**IP**NP**CV**EV  
 RhAAT 204 -**YVAM**MR-----M**WF**GE**KV**V**TR**RV**VD**AK**AT**S**AL**Q**DE**G**KSE**-----Y**VP**K**PS**RVQ  
 SAAT 205 -**YVDQ**ME**A**-----L**WF**AG**KV**AT**RR**EV**FG**V**KAI**SS**Q**DEAK**SE**-----S**VP**K**PS**RVH  
 VAAT 205 -**YARQ**ME**G**-----L**WF**V**GK**V**AT**RR**EV**FG**AKA**IS**V**Q**DE**AK**SE**-----S**VP**K**PS**RVQ

AeAAT 262 **VLS**GH**W**RS**WAR**S**LN**LP-----A**KQ**V**LK**LI**FS**NI**R**NR**VK**----P**S**I**AG**Y**Y**GN**AF**V**LGC**  
 Ban-AAAT 242 **VAI**AN**LW**Q**S**R**TR**AIN**LD**-----P**GV**D**VH**VC**FF**AN**TR**HL**RQ**V**VL**LP**PE**D**GY**Y**C**N**CF**Y**PVT**  
 MpAAT1 266 **LI**T**ACL**W**K**C**R**T**IL**AIN**IN**-----P**KE**AV**RV**SC**V**N**AR**C**K**H**NN**---V**R**I**EL**G**Y**Y**C**N**AF**A**FA**PA  
 AcAAT 265 **VLT**AC**LW**R**C**R**T**IC**AL**GLD-----P**PK**T**VR**IS**CA**AN**GR**C**K**H**D**---L**H**I**ER**G**Y**Y**C**N**V**F**AF**PA  
 CmAAAT1 259 **VLT**AY**W**RL**R**T**IAL**Q**FK**----P**EE**VR**FL**C**V**NR**SK**ID----I--**EL**G**Y**Y**C**N**AV**V**V**PA  
 CmAAAT2 266 **VLA**AY**W**RL**R**T**IA**F**OL**K----P**EE**VR**FL**C**V**NR**SK**ID----I--**EL**G**Y**Y**C**N**AI**V**PA**  
 VpAAT 264 **VLT**AY**W**LR**C**Y**T**IA**LQ**PD-----P**EE**NR**VI**C**V**NS**R**K**LN**---P**P**I**ET**G**Y**Y**C**N**IA**A**PA**  
 CmAAAT3 261 **VLT**AC**LW**R**F**R**T**IS**LQ**PD-----P**EE**VR**VL**C**V**NS**R**K**FN**---P**P**I**ET**G**Y**Y**C**N**AF**A**PA**  
 BEBT 263 **VLT**AC**LW**R**C**R**T**IA**IK**PN-----P**DE**VR**MI**C**V**N**AR**K**FN**---P**P**I**ED**G**Y**Y**C**N**AF**A**PA**  
 BEAT 248 **LVT**AT**LS**K**S**L**IE**MD**CA**PK-**EL**T**K**S**R**PS**L**M**V**H**M**NI**R**R**ET**KL---A**L**E-ND**V**S**C**N**FF**I**V**VN  
 CmAAAT4 264 **TL**T**CF**I**W**K**YL**M**K**V**AD**D**GD**---S**QR**PS**T**L**SH**V**N**R**K**M**L**-E---P**S**I**GE**V**S**I**C**N**I**M**W**GT**V**  
 RhAAT 250 **ALT**G**F**L**W**K**H**Q**L**A**AS**R**AL**SS**GT**-S**TR**F**S**V**AS**Q**T**V**N**I**R**K**M**N**M**---K**T**T**L**D**NA**I**C**N**I**F**L**A**S**  
 SAAT 251 **AV**T**G**F**L**W**K**H**L**I**A**AS**R**AL**T**S**GT**T**S**TR**L**S**IA**A**Q**AV**N**I**R**R**M**N**M**---E**T**I**LD**NA**I**C**N**L**I**W**IA**Q  
 VAAT 251 **AV**T**S**F**L**W**K**H**L**I**A**T**S**R**AL**T**S**GT**T**S**TR**L**S**I**A**T**O**V**N**I**R**R**M**N**M**---E**T**I**W**DN**A**I**C**N**L**I**W**I**AP**

AeAAT 313 **AQ**----**T**SV**KD**I**TE**K**L**G**Y**CA**L**V**R**CA**KER**V**G**E**Y**A**EV**V**ES**W**SW**P-----R  
 Ban-AAAT 297 **AT**----**A**PS**G**R**I**AS**AE**L**ID**V**S**I**TR**DA**KSR**P**GE**FA**WA**AG**DF**K**D**D-----P  
 MpAAT1 318 **AI**----**S**KA**EP**I**CK**N**PL**G**Y**A**EL**V**K**AK**AT**W**EE**Y**L**SV**AD**L**L**V**LR**-----G  
 AcAAT 316 **VV**----**S**RAG**M**I**ST**S**L**E**Y**T**VE**V**K**AK**AR**T**GE**Y**L**SV**AD**L**M**V**T**K-----G  
 CmAAAT1 308 **VI**----**T**TA**AK**L**CG**N**PL**G**Y**A**VL**IR**K**AK**AK**AT**ME**Y**IR**ST**VD**L**M**V**IK**-----G  
 CmAAAT2 315 **VV**----**T**TV**AK**I**CG**N**PL**G**Y**A**VL**IR**K**AK**AK**AT**KE**Y**IR**SM**VD**E**V**IK-----G  
 VpAAT 315 **AV**----**S**QA**K**I**C**EN**PF**G**Y**T**QL**V**K**Q**T**K**VD**T**EE**Y**M**SA**AD**L**M**AM**K**-----G  
 CmAAAT3 312 **AV**----**T**TAG**K**L**CQ**N**PL**G**Y**A**EL**V**R**KA**KAD**T**E**D**Y**M**S**V**AD**L**M**V**IK**-----G  
 BEBT 314 **AV**----**T**TAG**K**L**CNN**PL**G**FA**EL**IR**K**AK**RE**T**EE**Y**M**S**V**AD**L**M**V**AT-----G  
 BEAT 303 **A**ES**K**-I**TV**A**PK**I**T**D**L**-----T**ES**L**G**S**AC**GE**I**S**EV**AK**DD**A**EV**V**SS**M**V**L**NS**V**REF**Y  
 CmAAAT4 316 **A**HH**F**ST**R**NE**E**F**E**GLE**SK**L**VS**L**R**Q**S**F**K**N**K**O**Y**I**RE**I**M**GG**D**KE-**RR**NG**V**M**K**LV**GE**-I  
 RhAAT 306 **A**R**L**D**L**ND**T**AP**G**SS**DL**K**CD**L**V**N**L**NE**S**I**K**E**F**NS**DY**E**IL**K**G**KE**Y**G-**GM**CD**L**D**F**ME**EG**S  
 SAAT 308 **A**L**L**EL**S**H**T**TP**E**SD**L**K**CD**L**V**N**L**NG**S**V**K**Q**C**NG**DY**F**E**I**F**KG**KE**Y**G**-**RM**CE**Y**L**D**F**Q**RT**S**  
 VAAT 308 **A**L**L**EL**S**H**T**T**L**E**SD**L**K**CD**L**V**N**L**NG**S**V**K**Q**C**NG**D**Y**F**E**I**F**MG**KE**Y**G**-**SM**CE**Y**L**D**F**Q**RT**S**

AeAAT 356 **R**ASP**D**S**V**GL**L**-I**S**Q**W**R**EL**DR**V**DF**L**GR**P**--V**Q**V**GE**IC**C**-----D**RY**CL**EL**P**VR**-  
 Ban-AAAT 340 **Y**-E**L**E**FT**Y**NS**I**F**V**SD**W**TR**I**GE**L**D**V**D**GW**G**PL**H**V**IP**F**A**Y**LD**I**M**AV**GT**I**G**-----A**P**PA-  
 MpAAT1 361 **R**PO**Y**ST**G**S**Y**I**I**V**SD**N**TR**V**GF**GD**V**N**FG**W**GQ**--F**V**F**AG**F**V**--K**A**----L**D**I**S**F**Y**Q**H**KN  
 AcAAT 359 **R**E**L**Y**V**AG**N**Y**I**-V**SD**T**TR**V**GF**DA**L**DF**G**W**G**--F**V**Y**G**GA**A**--R**A**----F**P**I**S**E**Y**AR**F**KN  
 CmAAAT1 351 **R**E**Y**F**V**V**G**S**F**M**MS**D**L**T**R**I**GV**EN**V**DF**G**W**G**--A**I**F**G**GP**T**--T**T**G**A**R**I**TR**G**V**S**F**CV**P**F**MM  
 CmAAAT2 358 **R**E**R**F**E**H**G**P**F**M**MS**D**L**T**R**I**GE**EN**V**DF**G**W**G**--A**I**F**G**GF**I**--I**G**GC**GI**TR**G**M**S**T**A**F**MM**  
 VpAAT 358 **R**E**R**F**E**V**V**RR**Y**M**V**SD**V**T**R**AG**E**GL**V**DF**G**W**G**R**PE**F**V**Y**G**GA**A**--K**G**GV**GE**I**P**GV**T**S**F**F**V**P**F**KN  
 CmAAAT3 355 **R**E**R**F**E**V**V**RT**Y**I**V**SD**V**T**R**AG**E**D**V**DF**G**W**G**--A**M**Y**G**GA**A**--K**G**GV**GA**IP**G**V**S**F**Y**I**P**F**KN**  
 BEBT 357 **R**E**R**F**E**V**V**NT**Y**I**V**SD**V**T**R**AG**E**GE**V**DF**G**W**GE**--A**V**Y**G**GA**A**--K**G**GV**GV**IP**G**V**T**S**F**Y**I**PL**R**N  
 BEAT 353 **Y**E**W**G**K**E**K**N**V**F**Y**SS**W**C**R**F**P**L**Y**E**V**DF**G**W**GI**PS**L**V--D**T**T-----F**P**P--F**L**I**V**LM**D**E  
 CmAAAT4 374 **N**K**W**P--I**SN**Y**F**F**IS**W**KN**L**KL**NE**V**DF**G**W**G**PL**WS**--A**IA**-----G**D**P**NE**M**G**NI**VL**VD  
 RhAAT 365 **F**V**E**P--A**PE**Y**S**F**SS**W**TR**F**ED**Q**V**DF**G**W**GR**PS**W**V--G**S**F-----G**R**W**E**T**R**--N**F**T**I**F**VE**  
 SAAT 367 **S**M**E**P--A**P**D**I**Y**L**F**SS**W**T**N**F**-E**N**PL**DF**G**W**GR**T**SW**L**--G**V**A-----G**R**T**E**S**A**S**C**K**F**I**L**V**P**  
 VAAT 367 **S**M**E**P--A**PE**I**Y**L**F**SS**W**T**N**F**EN**Q**L**DF**G**W**GR**T**SW**L--G**V**A-----G**R**T**E**S**A**F**C**N**L**T**L**V**P**

AeAAT 404 -D**R**T**ES**V**K**V**M**AV**P**T**S**AV**DR**ME**Y**F**IR**SP**YS**-----  
 Ban-AAAT 392 -P**Q**K**G**TR**V**W**A**Q**VE**KE**H**M**Q**A**EL**E**M**K**G**FA-----  
 MpAAT1 412 -N**T**ED**GI**I**V**PN**CL**P**S**A**M**R**EQ**Q**EB**ER**IT**Q**EP**KE-**I**C**N**-----N**R**I**ST**S**Q**-----  
 AcAAT 409 **NR**-G**E**D**CT**V**V**L**CL**P**EA**A**M**K**R**Q**DE**I**K**M**T**EE**H**--V**D**GP**F**E**Y**KL**K**M**SK**L-----  
 CmAAAT1 406 **RN**-G**E**R**G**T**AS**I**CL**P**P**A**M**R**ER**AN**W**HAS**L**Q**V**K**Q**V**DA**V**D**SH**MQ**-T**OS**ASK-----  
 CmAAAT2 413 **RN**-G**E**R**G**I**V**PN**CL**P**P**A**M**R**ER**AN**W**HAS**L**Q**V**I**Q**V**L**K**V**DR**D**M**Q**-T**IL**S**AL**-----  
 VpAAT 415 **RK**-G**E**R**G**I**V**PT**CL**P**P**A**M**R**ER**AK**L**NE**I**L**Q**N**QL**SA**E**-E**N**K**S**V**F**V**S**AI-----  
 CmAAAT3 410 **KK**-G**E**R**G**I**V**PN**CL**P**A**P**A**M**R**EV**KE**I**D**ALL**K**AG**K**T**IG**V**D**N**K**K**P**I**F**AS**AL**-----  
 BEBT 412 **RQ**-G**E**R**G**I**V**PN**CL**P**SA**A**M**E**IA**E**A**E**A**N**N**T**L**NG**KE**-E**IA**K-----H**F**T**Q**SS**L**-----  
 BEAT 402 **AP**AG**EG**-I**A**V**R**ACL**SE**H**M**I**Q**EQ**QH**Q-----L**S**Y**S**V-----  
 CmAAAT4 424 **N**VL**D**GS**T**E**A**W**L**L**DE**KE**M**Q**L**EQ**IP**Q-----F**L**E**F**ALL**N**P**S**I**N**PH**N**Q**K**T**A**D**E**I**F**S**N**  
 RhAAT 412 **TQ**CD**EG**-I**D**A**W**T**V**DE**K**Q**M**AM**L**EQ**IP**Q-----F**A**FA**S**PN**P**R**I**S**AS**SV**G**M**D**-----  
 SAAT 416 **TQ**CG**SG**-I**E**A**W**N**L**E**E**K**M**AM**L**EQ**IP**H-----F**A**L**A**SP**K**T**L**I-----  
 VAAT 416 **T**P**C**D**T**G**TE**A**W**N**L**E**E**K**M**AM**L**EQ**IP**Q-----F**A**L**A**SP**K**T**L**I**S**R**Y**-----

|         |         |
|---------|---------|
| AeAAT   | ---     |
| Ban-AAT | ---     |
| MpAAT1  | ---     |
| AcAAT   | ---     |
| CmAAT1  | ---     |
| CmAAT2  | ---     |
| VpAAT   | ---     |
| CmAAT3  | ---     |
| BEBT    | ---     |
| BEAT    | ---     |
| CmAAT4  | 477 KLI |
| RhAAT   | ---     |
| SAAT    | ---     |
| VAAT    | ---     |
